# Supplementary material for: Rapamycin increases oxidative stress response gene expression in adult stem cells
Source: Aging (Albany NY). 2012 Apr 18;4(4):279–89. doi: 10.18632/aging.100451 (PMC3371763; doi:10.18632/aging.100451)
Supplement: Supplemental Table 1 — Selected differentially expressed genes from the oligo microarray (rapamycin-exposed SSCs vs controls) [file aging-04-279-s001.xls]

## Sheet: rapamycin-exp SSCs vs controls
Gene Symbol	Gene Sequence Name	Accession #	Fold Change	P-value
BI793804	BI793804 ie38f02.x1 Kaestner ngn3 wt Mus musculus cDNA 3', mRNA sequence [BI793804]	BI793804	35.2608	4.55e-18
Wnk3	PREDICTED: Mus musculus WNK lysine deficient protein kinase 3, transcript variant 3 (Wnk3), mRNA [XM_909586]	XM_909586	32.096	9.49e-18
Grem2	Mus musculus gremlin 2 homolog, cysteine knot superfamily (Xenopus laevis) (Grem2), mRNA [NM_011825]	NM_011825	27.3881	2.37e-21
Hbb-bh1	Mus musculus hemoglobin Z, beta-like embryonic chain (Hbb-bh1), mRNA [NM_008219]	NM_008219	27.2836	7.92e-16
Kif21a	Mus musculus kinesin family member 21A (Kif21a), transcript variant 1, mRNA [NM_001109040]	BC062896	26.8392	1.47e-21
AK038516	Mus musculus adult male hypothalamus cDNA, RIKEN full-length enriched library, clone:A230021N08 product:unclassifiable, full insert sequence. [AK038516]	AK038516	23.2067	2.2e-14
Sfrp4	Mus musculus secreted frizzled-related protein 4 (Sfrp4), mRNA [NM_016687]	NM_016687	23.1982	3.34e-15
BC021891	Mus musculus cDNA sequence BC021891 (BC021891), mRNA [NM_145608]	AK220424	22.6275	1.7e-21
Hsd17b1	Mus musculus hydroxysteroid (17-beta) dehydrogenase 1 (Hsd17b1), mRNA [NM_010475]	NM_010475	20.4453	4.15e-18
Bcan	Mus musculus brevican (Bcan), transcript variant 1, mRNA [NM_007529]	NM_007529	17.8952	6.01e-21
ENSMUST00000109215	tripartite motif-containing 7 Gene [Source:MGI (curated);Acc:Trim7-001] [ENSMUST00000109215]	NM_053166	17.7643	5.81e-16
Pde8b	Mus musculus phosphodiesterase 8B (Pde8b), mRNA [NM_172263]	NM_172263	17.6819	1.44e-15
1500001A10Rik	Mus musculus RIKEN cDNA 1500001A10 gene (1500001A10Rik), mRNA [NM_026886]	AK129457	16.8391	8.15e-11
Ssb	Mus musculus 2 days neonate thymus thymic cells cDNA, RIKEN full-length enriched library, clone:E430014C08 product:Sjogren syndrome antigen B, full insert sequence. [AK088370]	AK088370	16.6118	4.99e-16
Ttyh1	Mus musculus adult male corpus striatum cDNA, RIKEN full-length enriched library, clone:C030041G07 product:inferred: tweety homolog 1 (Drosophila), full insert sequence. [AK081274]	AK081274	16.5857	1.25e-10
Slc6a14	Mus musculus solute carrier family 6 (neurotransmitter transporter), member 14 (Slc6a14), mRNA [NM_020049]	NM_020049	16.2737	2.62e-10
AK041872	Mus musculus 3 days neonate thymus cDNA, RIKEN full-length enriched library, clone:A630043E07 product:unclassifiable, full insert sequence. [AK041872]	AK041872	16.1001	3.08e-10
1110012J17Rik	Mus musculus RIKEN cDNA 1110012J17 gene (1110012J17Rik), transcript variant 2, mRNA [NM_172963]	NM_172963	15.7983	1.22e-20
Fam19a5	Mus musculus family with sequence similarity 19, member A5 (Fam19a5), mRNA [NM_134096]	NM_134096	15.3736	1.11e-19
4930486L24Rik	Mus musculus RIKEN cDNA 4930486L24 gene (4930486L24Rik), mRNA [NM_178098]	NM_178098	15.2761	1.15e-20
Srd5a2l2	Mus musculus steroid 5 alpha-reductase 2-like 2 (Srd5a2l2), mRNA [NM_153801]	NM_153801	15.2029	6.56e-10
Scin	Mus musculus scinderin (Scin), mRNA [NM_009132]	NM_009132	14.9601	1.46e-16
Sema3c	Mus musculus 11 days embryo gonad cDNA, RIKEN full-length enriched library, clone:7030412F17 product:sema domain, immunoglobulin domain (Ig), short basic domain, secreted, (semaphorin) 3C, full insert sequence. [AK078589]	AK078589	14.6744	3.87e-20
AK053298	Mus musculus 0 day neonate eyeball cDNA, RIKEN full-length enriched library, clone:E130008E24 product:surfactant associated protein B, full insert sequence. [AK053298]	AK053298	14.6594	3.86e-11
Scx	Mus musculus scleraxis (Scx), mRNA [NM_198885]	NM_198885	14.2753	1.81e-20
Cldn23	Mus musculus claudin 23 (Cldn23), mRNA [NM_027998]	NM_027998	14.0986	2.15e-16
Accn4	Mus musculus amiloride-sensitive cation channel 4, pituitary (Accn4), mRNA [NM_183022]	NM_183022	14.0818	4.13e-09
AK078857	Mus musculus adult male colon cDNA, RIKEN full-length enriched library, clone:9030208A05 product:unclassifiable, full insert sequence [AK078857]	AK078857	14.0436	5.91e-19
Sox9	Mus musculus SRY-box containing gene 9 (Sox9), mRNA [NM_011448]	NM_011448	13.8457	0
Drp2	Mus musculus dystrophin related protein 2 (Drp2), mRNA [NM_010078]	NM_010078	13.6443	9.01e-09
Cldn11	Mus musculus claudin 11 (Cldn11), mRNA [NM_008770]	NM_008770	13.5692	2.51e-20
Nxf3	Mus musculus nuclear RNA export factor 3 (Nxf3), mRNA [NM_001024141]	NM_001024141	13.4052	2.75e-20
AK043717	Mus musculus 10 days neonate cortex cDNA, RIKEN full-length enriched library, clone:A830023H09 product:unclassifiable, full insert sequence [AK043717]	AK043717	13.3639	6.58e-12
Zfp799	Mus musculus zinc finger protein 799 (Zfp799), mRNA [NM_177359]	NM_177359	13.2813	3.32e-14
4930486L24Rik	Mus musculus RIKEN cDNA 4930486L24 gene (4930486L24Rik), mRNA [NM_178098]	NM_178098	13.2313	3.13e-20
BB531021	BB531021 RIKEN full-length enriched, 0 day neonate lung Mus musculus cDNA clone E030012P20 3'. [BB531021]	AK086934	13.116	1.33e-19
Fam110c	Mus musculus family with sequence similarity 110, member C (Fam110c), mRNA [NM_027828]	NM_027828	12.9411	2.33e-08
Kalrn	Mus musculus 9 days embryo whole body cDNA, RIKEN full-length enriched library, clone:D030062G07 product:unclassifiable, full insert sequence. [AK051053]	AK051053	12.9237	2.7e-13
BC034090	PREDICTED: Mus musculus cDNA sequence BC034090, transcript variant 1 (BC034090), mRNA [XM_148974]	XM_148974	12.7477	1.44e-10
AK042731	Mus musculus 7 days neonate cerebellum cDNA, RIKEN full-length enriched library, clone:A730019M22 product:unclassifiable, full insert sequence. [AK042731]	AK042731	12.4281	4.85e-15
Peg10	Mus musculus paternally expressed 10 (Peg10), transcript variant 1, mRNA [NM_001040611]	NM_130877	12.3735	1.79e-18
AK051274	Mus musculus 12 days embryo spinal ganglion cDNA, RIKEN full-length enriched library, clone:D130027L03 product:unclassifiable, full insert sequence. [AK051274]	AK051274	12.2596	7.09e-08
Lba1	Mus musculus lupus brain antigen 1, mRNA (cDNA clone MGC:113752 IMAGE:30536238), complete cds. [BC086653]	BC086653	12.2492	5.61e-20
6330415B21Rik	Mus musculus 7 days neonate cerebellum cDNA, RIKEN full-length enriched library, clone:A730099O13 product:hypothetical Cysteine-rich region profile containing protein, full insert sequence. [AK139309]	AK139309	12.1874	1.79e-19
Pappa	Mus musculus pregnancy-associated plasma protein A (Pappa), mRNA [NM_021362]	NM_021362	12.1617	1.27e-07
5031414D18Rik	Mus musculus RIKEN cDNA 5031414D18 gene (5031414D18Rik), mRNA [NM_198642]	NM_198642	12.0814	1.15e-07
AK042951	Mus musculus 7 days neonate cerebellum cDNA, RIKEN full-length enriched library, clone:A730042N05 product:unclassifiable, full insert sequence. [AK042951]	AK042951	11.992	6.96e-17
Sox9	Mus musculus SRY-box containing gene 9 (Sox9), mRNA [NM_011448]	NM_011448	11.9885	6.8e-20
2012-03-02	Mus musculus membrane-associated ring finger (C3HC4) 2 (March2), mRNA [NM_145486]	NM_145486	11.8392	2.61e-07
Cxadr	Mus musculus coxsackie virus and adenovirus receptor (Cxadr), transcript variant 1, mRNA [NM_001025192]	NM_001025192	11.6356	9.56e-13
Tbx22	Mus musculus T-box 22 (Tbx22), transcript variant 1, mRNA [NM_145224]	NM_145224	11.4447	8.65e-14
Dmrta1	Mus musculus doublesex and mab-3 related transcription factor like family A1 (Dmrta1), mRNA [NM_175647]	NM_175647	11.3539	1.13e-19
AK032581	Mus musculus adult male olfactory brain cDNA, RIKEN full-length enriched library, clone:6430603L18 product:unclassifiable, full insert sequence. [AK032581]	AK032581	11.3533	7.04e-07
Slc26a7	Mus musculus 2 days pregnant adult female ovary cDNA, RIKEN full-length enriched library, clone:E330015I04 product:PUTATIVE ANION TRANSPORTER homolog [Homo sapiens], full insert sequence [AK054327]	AK054327	11.199	2.15e-19
Zfp398	Mus musculus adult male corpora quadrigemina cDNA, RIKEN full-length enriched library, clone:B230352J12 product:hypothetical protein, full insert sequence. [AK046208]	AK046208	11.1627	9.09e-07
Cngb1	Mus musculus cyclic nucleotide gated channel beta 1, mRNA (cDNA clone IMAGE:4504353), partial cds [BC045114]	BC045114	11.0615	5.82e-08
Zdhhc2	Mus musculus zinc finger, DHHC domain containing 2 (Zdhhc2), mRNA [NM_178395]	NM_178395	10.828	2.97e-19
Acot5	Mus musculus acyl-CoA thioesterase 5 (Acot5), mRNA [NM_145444]	NM_145444	10.8237	1.6e-17
Pard6b	Mus musculus par-6 (partitioning defective 6) homolog beta (C. elegans), mRNA (cDNA clone MGC:35871 IMAGE:2655658), complete cds [BC025147]	BC025147	10.8071	2.56e-18
Sox8	Mus musculus SRY-box containing gene 8 (Sox8), mRNA [NM_011447]	NM_011447	10.7667	4.92e-19
D3Bwg0562e	Mus musculus DNA segment, Chr 3, Brigham & Women's Genetics 0562 expressed (D3Bwg0562e), mRNA [NM_177664]	NM_177664	10.7638	1.74e-19
AK047731	Mus musculus adult male corpus striatum cDNA, RIKEN full-length enriched library, clone:C030018G15 product:unclassifiable, full insert sequence [AK047731]	AK047731	10.747	3.9e-10
BC002199	Mus musculus cDNA sequence BC002199 (BC002199), mRNA [NM_145964]	NM_145964	10.6748	6.56e-09
AK047244	Mus musculus 10 days neonate cerebellum cDNA, RIKEN full-length enriched library, clone:B930041J07 product:hypothetical protein, full insert sequence. [AK047244]	AK047244	10.6375	2.28e-16
Hoxb8	Mus musculus homeo box B8 (Hoxb8), mRNA [NM_010461]	NM_010461	10.5375	1.97e-17
Rab3b	Mus musculus RAB3B, member RAS oncogene family (Rab3b), mRNA [NM_023537]	NM_023537	10.4551	3.38e-13
Inhbb	Mus musculus inhibin beta-B (Inhbb), mRNA [NM_008381]	NM_008381	10.4282	2.29e-19
Butr1	Mus musculus butyrophilin related 1 (Butr1), mRNA [NM_138678]	NM_138678	10.364	2.54e-19
Cyp2s1	Mus musculus cytochrome P450, family 2, subfamily s, polypeptide 1 (Cyp2s1), mRNA [NM_028775]	NM_028775	10.3559	2.51e-19
E030042N06Rik	Mus musculus 2 days pregnant adult female ovary cDNA, RIKEN full-length enriched library, clone:E330033L09 product:unclassifiable, full insert sequence. [AK087870]	AK087870	10.3092	7.93e-08
Sh3gl2	Mus musculus 10 days neonate cerebellum cDNA, RIKEN full-length enriched library, clone:B930049H17 product:unclassifiable, full insert sequence [AK047324]	AK047324	10.2626	5.27e-08
Qpct	Mus musculus glutaminyl-peptide cyclotransferase (glutaminyl cyclase) (Qpct), mRNA [NM_027455]	AK045974	10.2407	2.71e-19
Lrp8	Mus musculus low density lipoprotein receptor-related protein 8, apolipoprotein e receptor (Lrp8), transcript variant 1, mRNA [NM_053073]		10.2363	4.08e-19
AK036268	Mus musculus 16 days neonate cerebellum cDNA, RIKEN full-length enriched library, clone:9630050J22 product:unclassifiable, full insert sequence [AK036268]	AK036268	10.179	3.23e-16
Ppp1r3a	protein phosphatase 1, regulatory (inhibitor) subunit 3A Gene [Source:MGI Symbol;Acc:MGI:2153588] [ENSMUST00000045096]	NM_080464	10.1743	8.17e-09
Rgs17	Mus musculus regulator of G-protein signaling 17 (Rgs17), mRNA [NM_019958]	NM_019958	10.1211	6.91e-19
Inha	Mus musculus inhibin alpha (Inha), mRNA [NM_010564]	NM_010564	10.0444	3.36e-19
Igfbpl1	Mus musculus insulin-like growth factor binding protein-like 1 (Igfbpl1), mRNA [NM_018741]	NM_018741	9.94094	6.26e-11
Il17rb	Mus musculus IL-17 receptor homolog short isoform precursor (Evi27) mRNA, complete cds [AF208109]	AF208109	9.91038	4.88e-14
AK039803	Mus musculus 0 day neonate thymus cDNA, RIKEN full-length enriched library, clone:A430002P21 product:unclassifiable, full insert sequence. [AK039803]	AK039803	9.8845	5.33e-06
AK035834	Mus musculus 16 days neonate cerebellum cDNA, RIKEN full-length enriched library, clone:9630009A21 product:unclassifiable, full insert sequence. [AK035834]	AK035834	9.86027	2.11e-18
B130020M22Rik	Mus musculus 16 days embryo head cDNA, RIKEN full-length enriched library, clone:C130067I07 product:unclassifiable, full insert sequence. [AK048505]	AK048505	9.85995	8.65e-16
1700024P16Rik	PREDICTED: Mus musculus RIKEN cDNA 1700024P16 gene (1700024P16Rik), mRNA [XM_161350]	XM_161350	9.85748	6.52e-19
Cfi	Mus musculus complement component factor i (Cfi), mRNA [NM_007686]	NM_007686	9.82747	1.43e-18
4933416E14Rik	Mus musculus adult male testis cDNA, RIKEN full-length enriched library, clone:4933416E14 product:unclassifiable, full insert sequence [AK016831]	AK016831	9.82455	6.26e-11
Ocln	Mus musculus occludin (Ocln), mRNA [NM_008756]	NM_008756	9.80565	5.96e-18
Dpysl4	Mus musculus dihydropyrimidinase-like 4 (Dpysl4), mRNA [NM_011993]	NM_011993	9.80184	4.16e-19
D3Bwg0562e	Mus musculus DNA segment, Chr 3, Brigham & Women's Genetics 0562 expressed (D3Bwg0562e), mRNA [NM_177664]	NM_177664	9.69884	6.03e-19
Tmem114	Mus musculus transmembrane protein 114 (Tmem114), mRNA [NM_029070]	NM_029070	9.65065	4.84e-19
Aard	Mus musculus alanine and arginine rich domain containing protein (Aard), mRNA [NM_175503]	NM_175503	9.5841	5.19e-19
Wdr40b	Mus musculus WD repeat domain 40B (Wdr40b), mRNA [NM_178739]	NM_178739	9.56359	5.57e-19
ENSMUST00000112863	p21 (CDKN1A)-activated kinase 3 Gene [Source:MGI (curated);Acc:Pak3-008] [ENSMUST00000112863]		9.48412	9.42e-19
Drd4	Mus musculus dopamine receptor 4, mRNA (cDNA clone MGC:58931 IMAGE:6492837), complete cds [BC051421]	BC051421	9.46586	6.19e-19
AK049436	Mus musculus 7 days embryo whole body cDNA, RIKEN full-length enriched library, clone:C430010C20 product:unclassifiable, full insert sequence. [AK049436]	AK049436	9.43513	2e-05
Adora1	Mus musculus adenosine A1 receptor (Adora1), transcript variant 1, mRNA [NM_001008533]	NM_001008533	9.41964	6.25e-19
Cgn	Mus musculus cingulin (Cgn), mRNA [NM_001037711]	BC064474	9.41461	3.77e-18
Mrps5	Mus musculus 10 days neonate cerebellum cDNA, RIKEN full-length enriched library, clone:B930063A18 product:mitochondrial ribosomal protein S5, full insert sequence [AK047438]	AK047438	9.40295	2e-05
Etl4	Mus musculus 2 days pregnant adult female ovary cDNA, RIKEN full-length enriched library, clone:E330027G05 product:similar to HYPOTHETICAL 97.0 KDA PROTEIN [Homo sapiens], full insert sequence. [AK054453]	AK054453	9.38133	8.47e-13
Dtna	Mus musculus adult male stomach cDNA, RIKEN full-length enriched library, clone:2210407P21 product:unclassifiable, full insert sequence. [AK008850]	AK012743	9.35144	2e-05
C330005M16Rik	Mus musculus RIKEN cDNA C330005M16 gene (C330005M16Rik), mRNA [NM_175319]	NM_175319	9.30925	8.59e-19
Ap3s2	Mus musculus adaptor-related protein complex 3, sigma 2 subunit (Ap3s2), mRNA [NM_009682]	NM_009682	9.30778	2.42e-08
AK034829	Mus musculus 12 days embryo embryonic body between diaphragm region and neck cDNA, RIKEN full-length enriched library, clone:9430044C01 product:unclassifiable, full insert sequence. [AK034829]	AK034829	9.26452	2e-05
Tmem184a	Mus musculus transmembrane protein 184a (Tmem184a), mRNA [NM_144914]	NM_144914	9.26376	7.38e-19
AK037330	Mus musculus 16 days neonate thymus cDNA, RIKEN full-length enriched library, clone:A130007E13 product:unclassifiable, full insert sequence. [AK037330]	AK037330	9.25516	1.97e-17
NAP053619-1	Unknown		9.17028	2e-05
Clu	Mus musculus clusterin (Clu), mRNA [NM_013492]	NM_013492	9.15449	8.37e-19
Shbg	Mus musculus sex hormone binding globulin (Shbg), mRNA [NM_011367]	NM_011367	9.13598	8.6e-19
Kndc1	Mus musculus kinase non-catalytic C-lobe domain (KIND) containing 1 (Kndc1), mRNA [NM_177261]	NM_177261	9.1268	1.04e-18
Pard6b	Mus musculus par-6 (partitioning defective 6) homolog beta (C. elegans), mRNA (cDNA clone MGC:35871 IMAGE:2655658), complete cds [BC025147]	BC025147	9.1006	1.01e-18
Plxnc1	Mus musculus plexin C1 (Plxnc1), mRNA [NM_018797]	AK011113	9.098	9.53e-19
AK036012	Mus musculus 16 days neonate cerebellum cDNA, RIKEN full-length enriched library, clone:9630027C04 product:unclassifiable, full insert sequence. [AK036012]	AK036012	9.02606	9.27e-08
Adora1	Mus musculus adenosine A1 receptor (Adora1), transcript variant 1, mRNA [NM_001008533]	NM_001008533	8.98297	1.03e-18
AK041711	Mus musculus 3 days neonate thymus cDNA, RIKEN full-length enriched library, clone:A630031G17 product:unclassifiable, full insert sequence. [AK041711]	AK041711	8.92154	3e-05
Jakmip2	Mus musculus 12 days embryo eyeball cDNA, RIKEN full-length enriched library, clone:D230008E15 product:unclassifiable, full insert sequence. [AK051838]	AK051838	8.91508	4e-05
5031426D15Rik	Mus musculus 11 days pregnant adult female ovary and uterus cDNA, RIKEN full-length enriched library, clone:5031426D15 product:unclassifiable, full insert sequence. [AK019879]	AK019879	8.91208	4.98e-07
Gprasp2	PREDICTED: Mus musculus G protein-coupled receptor associated sorting protein 2 (Gprasp2), mRNA [XM_001474790]	XM_142154	8.90773	1.13e-18
Negr1	Mus musculus neuronal growth regulator 1 (Negr1), transcript variant 2, mRNA [NM_177274]	NM_177274	8.90308	2e-05
Mro	Mus musculus Maestro (Mro), mRNA [NM_027741]	NM_027741	8.72429	1.44e-18
Mmp12	Mus musculus matrix metallopeptidase 12 (Mmp12), mRNA [NM_008605]	NM_008605	8.66361	1.26e-16
Gpr37	Mus musculus G protein-coupled receptor 37 (Gpr37), mRNA [NM_010338]	NM_010338	8.65685	1.76e-18
Ppm1k	Mus musculus protein phosphatase 1K (PP2C domain containing) (Ppm1k), mRNA [NM_175523]	NM_175523	8.64715	4.73e-17
Gpm6b	Mus musculus 15 days embryo male testis cDNA, RIKEN full-length enriched library, clone:8030496P19 product:glycoprotein m6b, full insert sequence. [AK020224]	AK020224	8.62584	5e-05
Trim7	Mus musculus adult male testis cDNA, RIKEN full-length enriched library, clone:4931415C11 product:GLYCOGENIN-INTERACTING PROTEIN 2 homolog [Mus musculus], full insert sequence [AK029860]	AK029860	8.57398	2.17e-17
Rragb	Mus musculus Ras-related GTP binding B (Rragb), mRNA [NM_001004154]	NM_001004154	8.5113	6.05e-18
Fndc5	Mus musculus fibronectin type III domain containing 5 (Fndc5), mRNA [NM_027402]	NM_027402	8.45772	2.02e-18
Bex2	Mus musculus brain expressed X-linked 2 (Bex2), mRNA [NM_009749]	NM_009749	8.44378	2.09e-18
Rps6ka2	Mus musculus ribosomal protein S6 kinase, polypeptide 2 (Rps6ka2), mRNA [NM_011299]	NM_011299	8.42573	3.24e-17
Tmem56	Mus musculus transmembrane protein 56 (Tmem56), mRNA [NM_178936]	NM_178936	8.42306	9e-05
Etd	Mus musculus embryonic testis differentiation (Etd), mRNA [NM_175147]	NM_175147	8.40243	2.17e-18
Gspt2	Mus musculus 9 days embryo whole body cDNA, RIKEN full-length enriched library, clone:D030026K16 product:G1 to phase transition 2, full insert sequence. [AK050859]	AK050859	8.38073	4.76e-09
Nkx3-1	Mus musculus NK-3 transcription factor, locus 1 (Drosophila) (Nkx3-1), mRNA [NM_010921]	NM_010921	8.37717	1.31e-13
Sytl4	Mus musculus synaptotagmin-like 4 (Sytl4), mRNA [NM_013757]	NM_013757	8.36097	2.38e-18
AK035080	Mus musculus 12 days embryo embryonic body between diaphragm region and neck cDNA, RIKEN full-length enriched library, clone:9430085G19 product:unclassifiable, full insert sequence [AK035080]	AK035080	8.33757	0.00012
Rab3b	Mus musculus RAB3B, member RAS oncogene family (Rab3b), mRNA [NM_023537]	NM_023537	8.31105	3.04e-18
D230046B21Rik	Mus musculus 7 days neonate cerebellum cDNA, RIKEN full-length enriched library, clone:A730020N04 product:unclassifiable, full insert sequence. [AK042749]	AK042749	8.29211	0.00014
Slc6a14	Mus musculus solute carrier family 6 (neurotransmitter transporter), member 14 (Slc6a14), mRNA [NM_020049]	NM_020049	8.28069	4.16e-15
Alox12e	Mus musculus arachidonate lipoxygenase, epidermal (Alox12e), mRNA [NM_145684]	NM_145684	8.27959	6.81e-14
AK050314	Mus musculus adult male liver tumor cDNA, RIKEN full-length enriched library, clone:C730036J20 product:unclassifiable, full insert sequence. [AK050314]	AK050314	8.24803	4e-05
Lrrn4	Mus musculus leucine rich repeat neuronal 4 (Lrrn4), mRNA [NM_177303]	NM_177303	8.23956	7.05e-14
Orc4l	Mus musculus 7 days embryo whole body cDNA, RIKEN full-length enriched library, clone:C430020D18 product:origin recognition complex, subunit 4, full insert sequence. [AK049534]	AK049534	8.23586	0.00017
Ptprv	Mus musculus protein tyrosine phosphatase, receptor type, V (Ptprv), mRNA [NM_007955]	NM_007955	8.19256	3.46e-18
Atp13a4	Mus musculus ATPase type 13A4 (Atp13a4), mRNA [NM_172613]	NM_172613	8.18211	4.79e-18
Zfp275	Mus musculus zinc finger protein 275 (Zfp275), mRNA [NM_031494]	NM_031494	8.15664	3.27e-18
Rnf222	Mus musculus ring finger protein 222 (Rnf222), mRNA [NM_177060]	NM_177060	8.11332	6.13e-17
C530042K13Rik	Mus musculus 12 days embryo spinal cord cDNA, RIKEN full-length enriched library, clone:C530042K13 product:unclassifiable, full insert sequence [AK049699]	AK043921	8.10473	1.9e-09
Cdan1	Mus musculus congenital dyserythropoietic anemia, type I (human) (Cdan1), mRNA [NM_026891]	XM_485054	8.09023	9.09e-10
Slc6a4	Mus musculus solute carrier family 6 (neurotransmitter transporter, serotonin), member 4 (Slc6a4), mRNA [NM_010484]	NM_010484	8.01429	5.49e-16
Kcng3	Mus musculus potassium voltage-gated channel, subfamily G, member 3 (Kcng3), mRNA [NM_153512]	NM_153512	8.0086	5e-05
Arap2	Mus musculus ArfGAP with RhoGAP domain, ankyrin repeat and PH domain 2 (Arap2), mRNA [NM_178407]	BU557601	7.98629	4.26e-18
Caskin1	Mus musculus CASK interacting protein 1 (Caskin1), mRNA [NM_027937]	NM_027937	7.96388	3.93e-17
Espn	Mus musculus espin (Espn), transcript variant 6, mRNA [NM_019585]	NM_019585	7.9612	4.76e-18
Ubr5	Mus musculus ubiquitin protein ligase E3 component n-recognin 5 (Ubr5), transcript variant 1, mRNA [NM_001081359]	XM_898869	7.93797	1.77e-12
Fam70a	Mus musculus family with sequence similarity 70, member A (Fam70a), mRNA [NM_172930]	NM_172930	7.92211	4.47e-18
A730017C20Rik	Mus musculus RIKEN cDNA A730017C20 gene (A730017C20Rik), mRNA [NM_173759]	NM_173759	7.91687	1.43e-17
Scara5	Mus musculus 15 days embryo male testis cDNA, RIKEN full-length enriched library, clone:8030448C24 product:hypothetical protein, full insert sequence. [AK033154]	AK033154	7.90949	0.00018
Fam175a	Mus musculus family with sequence similarity 175, member A (Fam175a), mRNA [NM_172405]	NM_172405	7.83915	0.00016
Clec12b	Mus musculus C-type lectin domain family 12, member B (Clec12b), mRNA [NM_027709]	AK016908	7.80964	5.33e-18
Slc4a5	PREDICTED: Mus musculus RIKEN cDNA C330016K18 gene, transcript variant 3 (C330016K18Rik), mRNA [XM_888058]	XM_888058	7.79976	7.58e-07
AK086995	Mus musculus 0 day neonate lung cDNA, RIKEN full-length enriched library, clone:E030018P04 product:unclassifiable, full insert sequence. [AK086995]	AK086995	7.78607	0.00023
Klhl23	Mus musculus kelch-like 23 (Drosophila) (Klhl23), mRNA [NM_177784]	NM_177784	7.77656	9.43e-16
Zmat1	Mus musculus zinc finger, matrin type 1 (Zmat1), mRNA [NM_175446]	NM_175446	7.77536	7.36e-18
Otud5	Mus musculus NOD-derived CD11c +ve dendritic cells cDNA, RIKEN full-length enriched library, clone:F630004F08 product:SI:bZ30I22.1 (Novel protein similar to human FLJ12550) (Fragment) homolog [Brachydanio rerio], full insert sequence [AK169921]	AK169921	7.76893	1.04e-06
Aars	Mus musculus 0 day neonate lung cDNA, RIKEN full-length enriched library, clone:E030042J02 product:unclassifiable, full insert sequence. [AK087291]	AK087291	7.76041	0.0001
Fam40b	Mus musculus adult male aorta and vein cDNA, RIKEN full-length enriched library, clone:A530059G24 product:hypothetical protein, full insert sequence. [AK041004]	AK041004	7.74683	1.9e-12
Pard3b	Mus musculus par-3 partitioning defective 3 homolog B (C. elegans) (Pard3b), mRNA [NM_001081050]	AK007379	7.73965	1.75e-10
Mageb18	Mus musculus melanoma antigen family B, 18 (Mageb18), mRNA [NM_173783]	NM_173783	7.72825	0.00035
Slc2a12	Mus musculus solute carrier family 2 (facilitated glucose transporter), member 12 (Slc2a12), mRNA [NM_178934]	NM_178934	7.71586	3.49e-17
Drd4	Mus musculus dopamine receptor 4 (Drd4), mRNA [NM_007878]	NM_007878	7.70049	6.21e-18
AK036244	Mus musculus 16 days neonate cerebellum cDNA, RIKEN full-length enriched library, clone:9630048C11 product:unclassifiable, full insert sequence. [AK036244]	AK036244	7.66044	5e-05
Rshl3	PREDICTED: Mus musculus radial spokehead-like 3 (Rshl3), mRNA [XM_137041]	XM_137041	7.66016	0.00029
Syne1	Mus musculus synaptic nuclear envelope 1 (Syne1), transcript variant 1, mRNA [NM_153399]	AK122550	7.5714	0.00036
H2-Q10	Mus musculus histocompatibility 2, Q region locus 10 (H2-Q10), mRNA [NM_010391]	NM_010391	7.56933	9.18e-18
Papss2	Mus musculus 3'-phosphoadenosine 5'-phosphosulfate synthase 2 (Papss2), mRNA [NM_011864]	NM_011864	7.5505	6.28e-07
Aass	Mus musculus aminoadipate-semialdehyde synthase (Aass), nuclear gene encoding mitochondrial protein, mRNA [NM_013930]	NM_013930	7.53722	8.41e-18
BB549637	BB549637 RIKEN full-length enriched, 2 days pregnant adult female oviduct Mus musculus cDNA clone E230016M20 3'. [BB549637]	AK054077	7.52958	5.33e-07
NAP123875-1	Unknown		7.52003	2.51e-17
Scara3	Mus musculus scavenger receptor class A, member 3 (Scara3), mRNA [NM_172604]	NM_172604	7.46928	1.17e-17
Trim6	Mus musculus tripartite motif-containing 6 (Trim6), mRNA [NM_001013616]	NM_001013616	7.46796	6.36e-14
Ttyh1	Mus musculus tweety homolog 1 (Drosophila) (Ttyh1), transcript variant 2, mRNA [NM_021324]	NM_021324	7.46546	9.24e-18
Ppp2r2c	Mus musculus protein phosphatase 2 (formerly 2A), regulatory subunit B (PR 52), gamma isoform (Ppp2r2c), mRNA [NM_172994]	NM_172994	7.44286	1.02e-17
Ssh1	Mus musculus 0 day neonate eyeball cDNA, RIKEN full-length enriched library, clone:E130120I19 product:unclassifiable, full insert sequence. [AK087447]	AK087447	7.43351	0.00042
AK042315	Mus musculus 3 days neonate thymus cDNA, RIKEN full-length enriched library, clone:A630081H06 product:unclassifiable, full insert sequence. [AK042315]	AK042315	7.37526	0.00054
BC023202	Mus musculus 12 days embryo spinal cord cDNA, RIKEN full-length enriched library, clone:C530014B18 product:unclassifiable, full insert sequence [AK141429]	AK141429	7.37301	1.26e-17
Epb4.1l3	Mus musculus 15 days embryo head cDNA, RIKEN full-length enriched library, clone:D930022I19 product:unclassifiable, full insert sequence. [AK086340]	AK086340	7.3713	1.66e-13
Gstm7	Mus musculus adult male kidney cDNA, RIKEN full-length enriched library, clone:0610005A07 product:GLUTATHIONE S-TRANSFERASE, MU TYPE 3 (YB3) homolog [Mus musculus], full insert sequence. [AK002213]	AK002213	7.34355	1.15e-17
Daam2	Mus musculus dishevelled associated activator of morphogenesis 2 (Daam2), mRNA [NM_001008231]	AK122266	7.32691	1.18e-17
Phf16	Mus musculus mRNA for mKIAA0215 protein. [AK129091]	AK129091	7.2941	1.38e-17
Syt7	Mus musculus synaptotagmin VII (Syt7), transcript variant 3, mRNA [NM_173068]	AK080792	7.28769	4.24e-16
Lrba	Mus musculus LPS-responsive beige-like anchor (Lrba), transcript variant 3, mRNA [NM_001077687]	AF188507	7.28226	3.93e-12
Scrn1	Mus musculus mRNA for mKIAA0193 protein [AK129084]	AK129084	7.26901	1.33e-17
Mapk13	Mus musculus mitogen-activated protein kinase 13 (Mapk13), mRNA [NM_011950]	NM_011950	7.2576	1.46e-17
Lpar3	Mus musculus lysophosphatidic acid receptor 3 (Lpar3), mRNA [NM_022983]	NM_022983	7.25664	1.38e-17
Best3	Mus musculus 7 days embryo whole body cDNA, RIKEN full-length enriched library, clone:C430017E22 product:unclassifiable, full insert sequence [AK049492]	AK049492	7.2537	2.81e-11
Uxs1	UDP-glucuronate decarboxylase 1 Gene [Source:MGI Symbol;Acc:MGI:1915133] [ENSMUST00000076997]	NM_026430	7.24821	1.98e-17
Nr0b1	Mus musculus nuclear receptor subfamily 0, group B, member 1 (Nr0b1), mRNA [NM_007430]	NM_007430	7.246	1.38e-17
Rasgef1c	Mus musculus RasGEF domain family, member 1C (Rasgef1c), mRNA [NM_029004]	NM_029004	7.23339	5.5e-11
Tspyl2	Mus musculus TSPY-like 2 (Tspyl2), mRNA [NM_029836]	NM_029836	7.23044	1.68e-17
Dtna	Mus musculus dystrobrevin alpha (Dtna), transcript variant 1, mRNA [NM_207650]	NM_207650	7.21456	1.56e-15
Lpar2	Mus musculus lysophosphatidic acid receptor 2 (Lpar2), mRNA [NM_020028]	NM_020028	7.21329	1.5e-16
Asah2	Mus musculus 3 days neonate thymus cDNA, RIKEN full-length enriched library, clone:A630048A04 product:N-acylsphingosine amidohydrolase 2, full insert sequence. [AK041937]	AK041937	7.20966	0.00086
Mum1l1	Mus musculus melanoma associated antigen (mutated) 1-like 1 (Mum1l1), mRNA [NM_175541]	NM_175541	7.20904	1.55e-17
Gca	Mus musculus grancalcin (Gca), mRNA [NM_145523]	NM_145523	7.2073	1.81e-17
Mtap1b	Mus musculus microtubule-associated protein 1B (Mtap1b), mRNA [NM_008634]	BC045135	7.20436	1.89e-17
2210016H18Rik	Mus musculus adult male stomach cDNA, RIKEN full-length enriched library, clone:2210016H18 product:unclassifiable, full insert sequence [AK008737]	AK008737	7.18419	1.93e-17
Cst11	Mus musculus cystatin 11 (Cst11), mRNA [NM_030059]	NM_030059	7.18207	1.46e-16
BC051665	Mus musculus cDNA sequence BC051665 (BC051665), mRNA [NM_199148]	NM_199148	7.17776	1.64e-17
Cst12	Mus musculus adult male testis cDNA, RIKEN full-length enriched library, clone:1700006F03 product:CYSTATIN TE-1 homolog [Rattus norvegicus], full insert sequence. [AK005670]	AK005670	7.1768	1.54e-17
D730048I06Rik	Mus musculus RIKEN cDNA D730048I06 gene (D730048I06Rik), mRNA [NM_026593]	NM_026593	7.17595	0.00079
2310046K01Rik	Mus musculus RIKEN cDNA 2310046K01 gene (2310046K01Rik), mRNA [NM_027172]	NM_027172	7.15062	1.62e-17
A630057J21Rik	Mus musculus 3 days neonate thymus cDNA, RIKEN full-length enriched library, clone:A630057J21 product:unclassifiable, full insert sequence. [AK042094]	AK042094	7.14767	3.62e-07
Mro	Mus musculus adult male testis cDNA, RIKEN full-length enriched library, clone:4930507C04 product:unclassifiable, full insert sequence. [AK015725]	AK015725	7.12399	2.06e-17
LOC435145	PREDICTED: Mus musculus similar to hCG1788605 (LOC435145), mRNA [XM_487043]	XM_487043	7.10541	3.71e-16
Etnk2	Mus musculus ethanolamine kinase 2 (Etnk2), mRNA [NM_175443]	XM_903670	7.09983	1.78e-17
BC006965	Mus musculus cDNA sequence BC006965, mRNA (cDNA clone IMAGE:5030517). [BC038907]	BC038907	7.07057	2.47e-06
Lgr4	Mus musculus leucine-rich repeat-containing G protein-coupled receptor 4 (Lgr4), mRNA [NM_172671]	AK033699	7.06232	1.17e-16
Cpe	Mus musculus carboxypeptidase E (Cpe), mRNA [NM_013494]	NM_013494	7.05988	1.92e-17
Fam102a	Mus musculus family with sequence similarity 102, member A (Fam102a), mRNA [NM_153560]	NM_153560	7.04204	2.01e-17
AA438147	Mus musculus 16 days embryo lung cDNA, RIKEN full-length enriched library, clone:8430440E09 product:RAN binding protein 16, full insert sequence. [AK033408]	AK033408	7.03872	6.17e-12
Zdhhc2	Mus musculus adult retina cDNA, RIKEN full-length enriched library, clone:A930029O05 product:SMALL REC homolog [Rattus norvegicus], full insert sequence. [AK044652]	AK044652	7.03343	0.00079
Amhr2	Mus musculus anti-Mullerian hormone type 2 receptor (Amhr2), mRNA [NM_144547]	NM_144547	7.02132	2.06e-17
Lama1	Mus musculus laminin, alpha 1 (Lama1), mRNA [NM_008480]	NM_008480	7.02008	3.45e-17
Tyro3	Mus musculus TYRO3 protein tyrosine kinase 3 (Tyro3), mRNA [NM_019392]	NM_019392	7.01207	2.34e-17
Drp2	Mus musculus dystrophin related protein 2 (Drp2), mRNA [NM_010078]	NM_010078	7.01033	6.02e-15
Slc41a2	Mus musculus solute carrier family 41, member 2 (Slc41a2), mRNA [NM_177388]	NM_177388	7.00875	2.24e-17
Wif1	Mus musculus Wnt inhibitory factor 1 (Wif1), mRNA [NM_011915]	NM_011915	6.95714	6.67e-16
2310045A20Rik	Mus musculus RIKEN cDNA 2310045A20 gene (2310045A20Rik), mRNA [NM_172710]	NM_172710	6.95281	8.49e-14
ENSMUSG00000054618	Mus musculus 0 day neonate thymus cDNA, RIKEN full-length enriched library, clone:A430069L09 product:hypothetical protein, full insert sequence. [AK040144]	AK040144	6.94564	8.59e-11
Usp27x	Mus musculus 12 days embryo head cDNA, RIKEN full-length enriched library, clone:3002003A21 product:ubiquitin specific protease 27, X chromosome, full insert sequence [AK028249]	NM_019461	6.94266	0.00113
AK045358	Mus musculus adult male corpora quadrigemina cDNA, RIKEN full-length enriched library, clone:B230105H23 product:voltage-dependent anion channel 3, full insert sequence [AK045358]	AK045358	6.9193	0.00105
Uba6	Mus musculus 0 day neonate eyeball cDNA, RIKEN full-length enriched library, clone:E130112E08 product:MOP-4 homolog [Homo sapiens], full insert sequence. [AK053583]	AK053583	6.91163	0.00135
Acsl6	Mus musculus adult male brain UNDEFINED_CELL_LINE cDNA, RIKEN full-length enriched library, clone:M5C1038B08 product:acyl-CoA synthetase long-chain family member 6, full insert sequence [AK147421]	AK147421	6.90988	1.94e-08
A930041I02Rik	Mus musculus RIKEN cDNA A930041I02 gene (A930041I02Rik), mRNA [NM_178778]	NM_178778	6.90337	1e-05
A330078L11Rik	Mus musculus 0 day neonate skin cDNA, RIKEN full-length enriched library, clone:4631422E18 product:unclassifiable, full insert sequence. [AK028476]	AK028476	6.88253	0.00148
Dtna	Mus musculus dystrobrevin alpha (Dtna), transcript variant 2, mRNA [NM_010087]	NM_010087	6.8797	1.01e-16
Epha8	Mus musculus Eph receptor A8 (Epha8), mRNA [NM_007939]	NM_007939	6.87173	3.97e-10
Traf4	Mus musculus Tnf receptor associated factor 4 (Traf4), mRNA [NM_009423]	NM_009423	6.8699	0.00075
AK086673	Mus musculus 15 days embryo head cDNA, RIKEN full-length enriched library, clone:D930045B15 product:unclassifiable, full insert sequence. [AK086673]	AK086673	6.86217	0.00067
Sh2d4a	Mus musculus SH2 domain containing 4A (Sh2d4a), mRNA [NM_028182]	AK008803	6.85101	1.09e-15
Arap2	Mus musculus ArfGAP with RhoGAP domain, ankyrin repeat and PH domain 2 (Arap2), mRNA [NM_178407]	XM_900367	6.83577	2.97e-14
Pm20d1	Mus musculus cDNA fis, clone TRACH3014415, weakly similar to Carboxypeptidase S precursor (EC 3.4.17.4). [AK128969]	AK128969	6.81186	3.77e-12
Slc30a2	Mus musculus 13 days embryo male testis cDNA, RIKEN full-length enriched library, clone:6030430C21 product:ZINC TRANSPORTER 2 (ZNT-2) homolog [Rattus norvegicus], full insert sequence [AK031425]	AK031425	6.78626	3.33e-17
Ildr2	Mus musculus DNA segment, Chr 1, ERATO Doi 471, expressed, mRNA (cDNA clone IMAGE:5064213), partial cds [BC035277]	BC035277	6.78062	4.18e-17
Trub1	Mus musculus TruB pseudouridine (psi) synthase homolog 1 (E. coli), mRNA (cDNA clone IMAGE:5059520), with apparent retained intron [BC039287]	BC039287	6.76495	1.56e-09
AK052139	Mus musculus 12 days embryo eyeball cDNA, RIKEN full-length enriched library, clone:D230050G01 product:unclassifiable, full insert sequence. [AK052139]	AK052139	6.75908	1.19e-06
Pcsk1n	Mus musculus proprotein convertase subtilisin/kexin type 1 inhibitor (Pcsk1n), mRNA [NM_013892]	NM_013892	6.74357	3.63e-17
Lingo2	Mus musculus leucine rich repeat and Ig domain containing 2 (Lingo2), mRNA [NM_175516]	NM_175516	6.73845	8.66e-16
Ppig	Mus musculus peptidyl-prolyl isomerase G (cyclophilin G) (Ppig), mRNA [NM_001081086]	AK045812	6.73605	0.00163
ENSMUST00000120664	phosphodiesterase 4D, cAMP specific Gene [Source:MGI (curated);Acc:Pde4d-001] [ENSMUST00000120664]	AK081466	6.72375	8.2e-16
AI452195	Mus musculus adult male corpora quadrigemina cDNA, RIKEN full-length enriched library, clone:B230105D18 product:hypothetical protein, full insert sequence. [AK140033]	AK140033	6.70254	4.61e-16
AK046735	Mus musculus adult male cortex cDNA, RIKEN full-length enriched library, clone:B530005J22 product:unclassifiable, full insert sequence [AK046735]	AK046735	6.70226	0.0007
Tnik	Mus musculus adult male pituitary gland cDNA, RIKEN full-length enriched library, clone:5330404O20 product:hypothetical protein, full insert sequence. [AK133568]	AK021275	6.68027	8.16e-15
4933402E13Rik	Mus musculus adult male testis cDNA, RIKEN full-length enriched library, clone:4933402E13 product:hypothetical MAGE family containing protein, full insert sequence. [AK016614]	AK016614	6.67833	4.17e-17
6530401N04Rik	Mus musculus RIKEN cDNA 6530401N04 gene (6530401N04Rik), mRNA [NM_029545]	NM_029545	6.65609	4.63e-14
Dock3	Mus musculus mRNA for mKIAA0299 protein. [AK172930]	AK172930	6.64673	1.86e-07
Dtna	Mus musculus dystrobrevin alpha (Dtna), transcript variant 1, mRNA [NM_207650]	NM_207650	6.64663	5.22e-17
Rorc	Mus musculus RAR-related orphan receptor gamma (Rorc), mRNA [NM_011281]	NM_011281	6.60792	1.71e-16
Dtna	Mus musculus dystrobrevin alpha (Dtna), transcript variant 1, mRNA [NM_207650]	NM_207650	6.59766	7.28e-17
Gstm6	Mus musculus glutathione S-transferase, mu 6 (Gstm6), mRNA [NM_008184]	NM_008184	6.59408	5e-17
Hdac2	Mus musculus 12 days embryo spinal ganglion cDNA, RIKEN full-length enriched library, clone:D130072G11 product:histone deacetylase 2, full insert sequence. [AK051753]	AK051753	6.57488	0.0022
AW555464	Mus musculus expressed sequence AW555464 (AW555464), mRNA [NM_001024602]	NM_001024602	6.56185	5.48e-17
C1ql1	Mus musculus complement component 1, q subcomponent-like 1 (C1ql1), mRNA [NM_011795]	NM_011795	6.55748	1.37e-13
Myo5b	Mus musculus myosin Vb (Myo5b), mRNA [NM_201600]	NM_201600	6.53013	3.42e-16
Slc7a1	Mus musculus solute carrier family 7 (cationic amino acid transporter, y+ system), member 1 (Slc7a1), mRNA [NM_007513]	BC051230	6.51086	6.04e-17
AK080387	Mus musculus 3 days neonate thymus cDNA, RIKEN full-length enriched library, clone:A630088O04 product:unclassifiable, full insert sequence. [AK080387]	AK080387	6.50959	3.31e-08
Kif21a	Mus musculus kinesin family member 21A (Kif21a), transcript variant 3, mRNA [NM_016705]	NM_016705	6.50084	8.17e-17
Dhh	Mus musculus desert hedgehog (Dhh), mRNA [NM_007857]	NM_007857	6.49928	6.13e-17
TC1683744	Q4T3J6_TETNG (Q4T3J6) Chromosome undetermined SCAF10022, whole genome shotgun sequence, partial (10%) [TC1683744]		6.49604	0.002
Bbox1	Mus musculus butyrobetaine (gamma), 2-oxoglutarate dioxygenase 1 (gamma-butyrobetaine hydroxylase) (Bbox1), mRNA [NM_130452]	NM_130452	6.49212	3.87e-16
Gpr137c	Mus musculus G protein-coupled receptor 137C (Gpr137c), mRNA [NM_027518]	XM_354808	6.48802	0.00169
Ldhb	Mus musculus lactate dehydrogenase B (Ldhb), mRNA [NM_008492]	NM_008492	6.47548	6.45e-17
2410003J06Rik	Mus musculus RIKEN cDNA 2410003J06 gene (2410003J06Rik), transcript variant 1, mRNA [NM_028025]	AK010362	6.47367	6.51e-17
Nfrkb	Mus musculus nuclear factor related to kappa B binding protein (Nfrkb), mRNA [NM_172766]	NM_172766	6.44884	0.00106
Pde4d	Mus musculus 16 days neonate cerebellum cDNA, RIKEN full-length enriched library, clone:9630011N22 product:hypothetical Proline-rich region profile containing protein, full insert sequence. [AK035860]	AK035860	6.43631	0.00048
Kirrel2	Mus musculus kin of IRRE like 2 (Drosophila) (Kirrel2), mRNA [NM_172898]	NM_172898	6.43298	2.42e-06
AK048651	Mus musculus 16 days embryo head cDNA, RIKEN full-length enriched library, clone:C130093M03 product:unclassifiable, full insert sequence. [AK048651]	AK048651	6.41977	0.00302
Erbb4	Mus musculus v-erb-a erythroblastic leukemia viral oncogene homolog 4 (avian) (Erbb4), mRNA [NM_010154]	XM_136682	6.41817	0.00218
Tyro3	Mus musculus TYRO3 protein tyrosine kinase 3 (Tyro3), mRNA [NM_019392]	NM_019392	6.41194	7.57e-17
Tfam	Mus musculus transcription factor A, mitochondrial (Tfam), nuclear gene encoding mitochondrial protein, mRNA [NM_009360]	NM_009360	6.41088	3.22e-08
A630077J23Rik	Mus musculus 3 days neonate thymus cDNA, RIKEN full-length enriched library, clone:A630077J23 product:unclassifiable, full insert sequence [AK042273]	AK042273	6.40281	1.91e-16
BB636721	BB636721 RIKEN full-length enriched, adult male aorta and vein Mus musculus cDNA clone A530025H02 5', mRNA sequence [BB636721]	AK079958	6.39653	0.00224
AK082027	Mus musculus 16 days embryo head cDNA, RIKEN full-length enriched library, clone:C130096I01 product:unclassifiable, full insert sequence [AK082027]	AK082027	6.38361	0.00255
ENSMUST00000070283	DENN/MADD domain containing 1B Gene [Source:MGI Symbol;Acc:MGI:2447812] [ENSMUST00000070283]	NM_183217	6.37939	0.00272
Zbtb46	Mus musculus 0 day neonate kidney cDNA, RIKEN full-length enriched library, clone:D630009O07 product:BTB (POZ) domain containing 4, full insert sequence. [AK085310]	AK085310	6.3778	0.00278
Fbxo21	Mus musculus F-box protein 21 (Fbxo21), mRNA [NM_145564]	NM_145564	6.37289	8.16e-17
Tnik	Mus musculus TRAF2 and NCK interacting kinase, mRNA (cDNA clone IMAGE:6333274), containing frame-shift errors. [BC050866]	BC050866	6.35351	1.02e-16
Diap2	Mus musculus adult male aorta and vein cDNA, RIKEN full-length enriched library, clone:A530048N20 product:unclassifiable, full insert sequence. [AK040942]	AK040942	6.34924	0.00315
Ppp2r5e	Mus musculus 0 day neonate skin cDNA, RIKEN full-length enriched library, clone:4633401M22 product:unclassifiable, full insert sequence [AK076303]	AK014554	6.33602	0.00011
Kif1a	Mus musculus kinesin family member 1A (Kif1a), transcript variant 1, mRNA [NM_008440]	AK220487	6.32576	9.63e-17
AK048602	Mus musculus 16 days embryo head cDNA, RIKEN full-length enriched library, clone:C130085F16 product:unclassifiable, full insert sequence [AK048602]	AK048602	6.32406	4.97e-06
A930005G22Rik	Mus musculus adult retina cDNA, RIKEN full-length enriched library, clone:A930005G22 product:unclassifiable, full insert sequence [AK044281]	AK044281	6.31037	0.0039
Pip5k1b	Mus musculus phosphatidylinositol-4-phosphate 5-kinase, type 1 beta (Pip5k1b), mRNA [NM_008846]	NM_008846	6.3069	1.8e-16
Nt5e	Mus musculus 5' nucleotidase, ecto (Nt5e), mRNA [NM_011851]	NM_011851	6.30381	1.14e-16
Auts2	Mus musculus autism susceptibility candidate 2 (Auts2), mRNA [NM_177047]	AK147478	6.2855	2.38e-16
AK085052	Mus musculus 13 days embryo lung cDNA, RIKEN full-length enriched library, clone:D430030H08 product:unclassifiable, full insert sequence. [AK085052]	AK085052	6.2827	0.00267
3632454L22Rik	Mus musculus adult male hypothalamus cDNA, RIKEN full-length enriched library, clone:A230025D19 product:unclassifiable, full insert sequence. [AK038525]	AK028332	6.27119	6e-05
Fam65c	Mus musculus adult male tongue cDNA, RIKEN full-length enriched library, clone:2310033K02 product:weakly similar to DJ530I15.2 (NOVEL PROTEIN SIMILAR TO PLACENTAL PROTEIN DIFF40) (FRAGMENT) [Homo sapiens], full insert sequence. [AK009597]	AK009597	6.26977	0.00349
Myh1	Mus musculus myosin, heavy polypeptide 1, skeletal muscle, adult (Myh1), mRNA [NM_030679]	NM_030679	6.26031	1.86e-15
Csdc2	Mus musculus cold shock domain containing C2, RNA binding (Csdc2), mRNA [NM_145473]	NM_145473	6.26029	1.23e-16
Shc4	Mus musculus adult female vagina cDNA, RIKEN full-length enriched library, clone:9930029B02 product:hypothetical protein, full insert sequence. [AK036946]	AK036946	6.25839	3.67e-07
H2-Q10	Mus musculus histocompatibility 2, Q region locus 10 (H2-Q10), mRNA [NM_010391]	NM_010391	6.25622	1.12e-16
AK039656	Mus musculus adult male spinal cord cDNA, RIKEN full-length enriched library, clone:A330078N24 product:unclassifiable, full insert sequence. [AK039656]	AK039656	6.24701	1e-05
AK045058	Mus musculus 9.5 days embryo parthenogenote cDNA, RIKEN full-length enriched library, clone:B130023L04 product:unclassifiable, full insert sequence. [AK045058]	AK045058	6.24353	2.09e-12
Msh2	Mus musculus 15 days embryo male testis cDNA, RIKEN full-length enriched library, clone:8030473G08 product:mutS homolog 2 (E. coli), full insert sequence. [AK078775]	AK078775	6.21637	2.92e-13
Olfr39	Mus musculus olfactory receptor 39 (Olfr39), mRNA [NM_146825]	NM_146825	6.21608	3.5e-12
Tnik	Mus musculus TRAF2 and NCK interacting kinase, mRNA (cDNA clone IMAGE:6333274), containing frame-shift errors. [BC050866]	BC050866	6.20175	8.5e-16
Zdhhc2	Mus musculus adult male adrenal gland cDNA, RIKEN full-length enriched library, clone:B330016H11 product:SMALL REC homolog [Rattus norvegicus], full insert sequence [AK046533]	AK046533	6.19465	1.49e-16
OTTMUSG00000016816	PREDICTED: Mus musculus similar to DNA cytosine-5 methyltransferase 3B2 (LOC668932), mRNA [XM_001004878]	XM_001004878	6.19002	1.82e-07
CF586908	AGENCOURT_8784932_updated NIH_MGC_140 Mus musculus cDNA clone IMAGE:6436450 5', mRNA sequence [CF586908]	AK031316	6.18578	0.00317
Ppp1r9a	Mus musculus protein phosphatase 1, regulatory (inhibitor) subunit 9A (Ppp1r9a), mRNA [NM_181595]	NM_181595	6.17928	1.06e-14
AK044510	Mus musculus adult retina cDNA, RIKEN full-length enriched library, clone:A930017M14 product:laminin, alpha 1, full insert sequence. [AK044510]	AK044510	6.1596	2.84e-16
D19Bwg1357e	Mus musculus 2 days neonate thymus thymic cells cDNA, RIKEN full-length enriched library, clone:E430001I07 product:inferred: DNA segment, Chr 19, Brigham and Women's Genetics 1357 expressed, full insert sequence [AK087957]	AK087957	6.15582	0.00415
Fshr	Mus musculus follicle stimulating hormone receptor (Fshr), mRNA [NM_013523]	NM_013523	6.1393	1.86e-16
Zmat1	Mus musculus zinc finger, matrin type 1 (Zmat1), mRNA [NM_175446]	NM_175446	6.13699	1.48e-16
Vdr	Mus musculus vitamin D receptor (Vdr), mRNA [NM_009504]	NM_009504	6.13606	1.63e-16
Igfbp3	Mus musculus 9.5 days embryo parthenogenote cDNA, RIKEN full-length enriched library, clone:B130018L24 product:unclassifiable, full insert sequence. [AK045003]	AK045003	6.10755	1.6e-14
Lrba	Mus musculus LPS-responsive beige-like anchor (Lrba), transcript variant 2, mRNA [NM_001077688]	AF188506	6.0782	0.00521
Ppp1r9a	Mus musculus 10, 11 days embryo whole body cDNA, RIKEN full-length enriched library, clone:2810430P21 product:hypothetical protein, full insert sequence. [AK013208]	AK013208	6.0712	9.04e-13
3110035C09Rik	Mus musculus 13 days embryo head cDNA, RIKEN full-length enriched library, clone:3110035C09 product:unclassifiable, full insert sequence [AK014122]	AK014122	6.05984	2.19e-11
Mpzl2	Mus musculus myelin protein zero-like 2 (Mpzl2), mRNA [NM_007962]	NM_007962	6.05655	1.8e-16
AK045477	Mus musculus adult male corpora quadrigemina cDNA, RIKEN full-length enriched library, clone:B230206C05 product:unclassifiable, full insert sequence. [AK045477]	AK045477	6.05081	3.8e-09
Zc3h7b	Mus musculus zinc finger CCCH type containing 7B (Zc3h7b), mRNA [NM_001081016]	XM_001001617	6.04937	1.81e-16
AK035522	Mus musculus adult male urinary bladder cDNA, RIKEN full-length enriched library, clone:9530060O09 product:unclassifiable, full insert sequence [AK035522]	AK035522	6.04899	0.00041
Pard6b	Mus musculus par-6 (partitioning defective 6) homolog beta (C. elegans) (Pard6b), mRNA [NM_021409]	NM_021409	6.01558	2.6e-15
Cldn7	Mus musculus claudin 7 (Cldn7), mRNA [NM_016887]	NM_016887	6.0151	3.36e-16
9530001N24Rik	Mus musculus adult male urinary bladder cDNA, RIKEN full-length enriched library, clone:9530001N24 product:unclassifiable, full insert sequence. [AK020533]	AK020533	6.01473	0.00434
AK040858	Mus musculus adult male aorta and vein cDNA, RIKEN full-length enriched library, clone:A530031F03 product:unclassifiable, full insert sequence. [AK040858]	AK040858	6.00834	1.09e-08
ENSMUST00000100305	helicase with zinc finger domain Gene [Source:MGI (curated);Acc:Helz-002] [ENSMUST00000100305]	AK044226	5.99888	4.45e-14
Trpm3	Mus musculus 0 day neonate eyeball cDNA, RIKEN full-length enriched library, clone:E130119P07 product:MELASTATIN 2 (FRAGMENT) homolog [Homo sapiens], full insert sequence. [AK053673]	AK053673	5.99167	5e-05
Slc16a14	Mus musculus solute carrier family 16 (monocarboxylic acid transporters), member 14 (Slc16a14), mRNA [NM_027921]	NM_027921	5.98412	0.00486
2310046K01Rik	Mus musculus RIKEN cDNA 2310046K01 gene (2310046K01Rik), mRNA [NM_027172]	NM_027172	5.98145	2.19e-16
Rasl10a	Mus musculus RAS-like, family 10, member A (Rasl10a), mRNA [NM_145216]	NM_145216	5.97357	4.42e-16
Maged1	Mus musculus melanoma antigen, family D, 1 (Maged1), mRNA [NM_019791]	NM_019791	5.96185	2.25e-16
ENSMUST00000107269	pogo transposable element with ZNF domain Gene [Source:MGI (curated);Acc:Pogz-010] [ENSMUST00000107269]	AK122288	5.96037	0.00445
AK033595	Mus musculus adult male cecum cDNA, RIKEN full-length enriched library, clone:9130022D06 product:unclassifiable, full insert sequence [AK033595]	AK033595	5.93807	1.88e-13
Cpe	Mus musculus carboxypeptidase E (Cpe), mRNA [NM_013494]	NM_013494	5.93103	2.44e-16
EG245190	PREDICTED: Mus musculus predicted gene, EG245190 (EG245190), mRNA [XM_486328]	XM_486328	5.92845	2.92e-16
C230021P08Rik	Mus musculus Riken cDNA C230021P08 gene (C230021P08Rik), mRNA [NM_001001884]	NM_001001884	5.91237	5.46e-12
Hpdl	Mus musculus 4-hydroxyphenylpyruvate dioxygenase-like (Hpdl), mRNA [NM_146256]	NM_146256	5.9058	3.01e-16
Tmie	Mus musculus transmembrane inner ear (Tmie), mRNA [NM_146260]	NM_146260	5.90333	5.95e-16
Adamts3	AGENCOURT_18672698 NIH_MGC_189 Mus musculus cDNA clone IMAGE:30840140 5', mRNA sequence [CK790536]	CK790536	5.90242	0.00583
Ercc6	Mus musculus excision repair cross-complementing rodent repair deficiency, complementation group 6 (Ercc6), mRNA [NM_001081221]	AK048416	5.89562	4.15e-14
ENSMUST00000053608	ATPB2 GENE [Source:UniProtKB/TrEMBL;Acc:Q99386] [ENSMUST00000053608]		5.89066	3e-16
Ankrd58	Mus musculus ankyrin repeat domain 58 (Ankrd58), mRNA [NM_173779]	NM_173779	5.87783	3.51e-15
Ctnnal1	Mus musculus catenin (cadherin associated protein), alpha-like 1 (Ctnnal1), mRNA [NM_018761]	NM_018761	5.87182	3.2e-15
Kl	Mus musculus mRNA for secreted isoform of Klotho protein, complete cds [AB010088]	AB010088	5.86991	0.00509
Pard3b	Mus musculus par-3 partitioning defective 3 homolog B (C. elegans) (Pard3b), mRNA [NM_001081050]	XM_110852	5.86613	4.99e-16
AK050382	Mus musculus adult male liver tumor cDNA, RIKEN full-length enriched library, clone:C730042C18 product:unclassifiable, full insert sequence [AK050382]	AK050382	5.85437	0.00018
Frzb	Mus musculus frizzled-related protein (Frzb), mRNA [NM_011356]	NM_011356	5.82404	8.06e-16
Shprh	Mus musculus SNF2 histone linker PHD RING helicase (Shprh), transcript variant 2, mRNA [NM_172937]	NM_172937	5.82129	0.00625
Nav3	Mus musculus mRNA for mKIAA0938 protein. [AK122404]	XM_001003712	5.81916	3.84e-06
Lphn1	Mus musculus latrophilin 1 (Lphn1), mRNA [NM_181039]	AK147455	5.81608	3.35e-16
Gatm	Mus musculus glycine amidinotransferase (L-arginine:glycine amidinotransferase) (Gatm), nuclear gene encoding mitochondrial protein, mRNA [NM_025961]	NM_025961	5.81435	3.35e-16
Ric3	Mus musculus resistance to inhibitors of cholinesterase 3 homolog (C. elegans) (Ric3), transcript variant 1, mRNA [NM_001038624]	NM_001038624	5.81174	1.18e-13
2012-09-06	Mus musculus 2 days neonate thymus thymic cells cDNA, RIKEN full-length enriched library, clone:C920001C06 product:hypothetical protein, full insert sequence. [AK083302]	AK083302	5.80754	1.53e-07
Espn	Mus musculus espin (Espn), transcript variant 1, mRNA [NM_207687]	NM_207687	5.79753	3.67e-16
Rgmb	Mus musculus RGM domain family, member B, mRNA (cDNA clone IMAGE:5351870), partial cds. [BC030405]	BC030405	5.79677	2.6e-07
AK079181	Mus musculus adult male urinary bladder cDNA, RIKEN full-length enriched library, clone:9530010B05 product:unclassifiable, full insert sequence. [AK079181]	AK079181	5.79372	0.00477
			5.79319	0
Kcnh2	Mus musculus potassium voltage-gated channel, subfamily H (eag-related), member 2 (Kcnh2), mRNA [NM_013569]	NM_013569	5.77982	4.45e-16
Lin28b	Mus musculus 9.5 days embryo parthenogenote cDNA, RIKEN full-length enriched library, clone:B130011C22 product:hypothetical protein, full insert sequence. [AK044904]	AK044904	5.77946	0.00615
AK044880	Mus musculus 9.5 days embryo parthenogenote cDNA, RIKEN full-length enriched library, clone:B130009M12 product:coatomer protein complex, subunit gamma 2, full insert sequence [AK044880]	AK044880	5.77914	5e-05
Xpo1	Mus musculus exportin 1, CRM1 homolog (yeast) (Xpo1), transcript variant 1, mRNA [NM_134014]	NM_134014	5.77733	0.00643
Plekhh2	Mus musculus pleckstrin homology domain containing, family H (with MyTH4 domain) member 2 (Plekhh2), mRNA [NM_177606]	NM_177606	5.77426	0.00805
Rhpn2	Mus musculus rhophilin, Rho GTPase binding protein 2 (Rhpn2), mRNA [NM_027897]	NM_027897	5.7677	3.93e-16
Scd2	Mus musculus stearoyl-Coenzyme A desaturase 2 (Scd2), mRNA [NM_009128]	NM_009128	5.76117	3.87e-16
NAP061671-1	Unknown		5.74918	0.00635
Daam2	Mus musculus dishevelled associated activator of morphogenesis 2 (Daam2), mRNA [NM_001008231]	NM_001008231	5.73635	1.78e-15
D930050A07Rik	Mus musculus 15 days embryo head cDNA, RIKEN full-length enriched library, clone:D930050A07 product:unclassifiable, full insert sequence [AK053100]	AK053100	5.73374	4.79e-15
Gpr37	Mus musculus adult retina cDNA, RIKEN full-length enriched library, clone:A930017K23 product:G PROTEIN-COUPLED RECEPTOR 37, full insert sequence. [AK044508]	AK044508	5.72671	0.00058
Slc7a4	Mus musculus solute carrier family 7 (cationic amino acid transporter, y+ system), member 4 (Slc7a4), mRNA [NM_144852]	NM_144852	5.72185	4.59e-16
Mmaa	Mus musculus methylmalonic aciduria (cobalamin deficiency) type A (Mmaa), nuclear gene encoding mitochondrial protein, mRNA [NM_133823]	NM_133823	5.71977	0.00747
Dync1i1	Mus musculus dynein cytoplasmic 1 intermediate chain 1 (Dync1i1), mRNA [NM_010063]	NM_010063	5.71218	4.57e-16
TC1611910	Unknown		5.70963	0.00879
Slc9a2	Mus musculus adult male testis cDNA, RIKEN full-length enriched library, clone:4932415O19 product:SODIUM [AK077026]	AK077026	5.70723	5.16e-16
E030049G20Rik	Mus musculus RIKEN cDNA E030049G20 gene (E030049G20Rik), transcript variant 2, mRNA [NM_172484]	NM_172484	5.70363	2.05e-15
Pvrl2	Mus musculus poliovirus receptor-related 2 (Pvrl2), mRNA [NM_008990]	NM_008990	5.70327	1.29e-15
Sox8	Mus musculus SRY-box containing gene 8 (Sox8), mRNA [NM_011447]	NM_011447	5.69555	1.12e-15
NAP022465-001	Unknown		5.69169	1.08e-11
Srfbp1	Mus musculus lung RCB-0558 LLC cDNA, RIKEN full-length enriched library, clone:G730041G14 product:hypothetical protein, full insert sequence [AK144845]	NM_026040	5.68874	2.09e-08
AB041544	Mus musculus brain cDNA, clone MNCb-2622, similar to AB033102 KIAA1276 protein (Homo sapiens). [AB041544]	AB041544	5.68257	0.00201
Lphn1	Mus musculus latrophilin 1 (Lphn1), mRNA [NM_181039]	AK013763	5.6708	5.08e-16
Gata4	Mus musculus GATA binding protein 4 (Gata4), mRNA [NM_008092]	NM_008092	5.67065	0
Cst9	Mus musculus cystatin 9 (Cst9), mRNA [NM_009979]	NM_009979	5.66879	5.03e-16
Tpd52l1	Mus musculus tumor protein D52-like 1 (Tpd52l1), mRNA [NM_009413]	NM_009413	5.66196	5.22e-16
Tmem144	Mus musculus transmembrane protein 144 (Tmem144), mRNA [NM_027495]	NM_027495	5.66149	1.21e-15
Rprm	Mus musculus reprimo, TP53 dependent G2 arrest mediator candidate (Rprm), mRNA [NM_023396]	NM_023396	5.6614	0.00884
Reep1	Mus musculus receptor accessory protein 1 (Reep1), mRNA [NM_178608]	NM_178608	5.65998	5.17e-16
Rhot1	Mus musculus 7 days neonate cerebellum cDNA, RIKEN full-length enriched library, clone:A730085D20 product:unclassifiable, full insert sequence. [AK043323]	AK043323	5.65754	5.53e-06
2410003J06Rik	Mus musculus RIKEN cDNA 2410003J06 gene (2410003J06Rik), transcript variant 1, mRNA [NM_028025]	AK010362	5.65466	5.5e-16
Ubash3a	Mus musculus ubiquitin associated and SH3 domain containing, A (Ubash3a), mRNA [NM_177823]	NM_177823	5.65229	0.00223
Gpm6b	Mus musculus glycoprotein m6b (Gpm6b), mRNA [NM_023122]	NM_023122	5.64978	5.42e-16
Txlnb	Mus musculus taxilin beta (Txlnb), mRNA [NM_138628]	NM_138628	5.63997	2.38e-12
Tmem206	Mus musculus transmembrane protein 206 (Tmem206), mRNA [NM_025864]	NM_025864	5.63988	5.5e-16
Fndc5	Mus musculus fibronectin type III domain containing 5 (Fndc5), mRNA [NM_027402]	NM_027402	5.63528	5.58e-16
Pop1	Mus musculus adult male diencephalon cDNA, RIKEN full-length enriched library, clone:9330153B03 product:RIKEN cDNA 4932434G09 gene, full insert sequence [AK034063]	AK034063	5.63046	8e-05
Fbxo17	Mus musculus F-box protein 17 (Fbxo17), mRNA [NM_015796]	NM_015796	5.62897	1.25e-15
TC1644790	Unknown		5.62292	1.66e-08
Rprm	Mus musculus reprimo, TP53 dependent G2 arrest mediator candidate (Rprm), mRNA [NM_023396]	NM_023396	5.6221	0.00814
AK043468	Mus musculus 7 days neonate cerebellum cDNA, RIKEN full-length enriched library, clone:A730098I17 product:unclassifiable, full insert sequence. [AK043468]	AK043468	5.61252	1.38e-15
Rhox5	Mus musculus reproductive homeobox 5 (Rhox5), mRNA [NM_008818]	NM_008818	5.61056	5.97e-16
AI851716	Mus musculus adult male pituitary gland cDNA, RIKEN full-length enriched library, clone:5330440P20 product:unclassifiable, full insert sequence [AK133701]	AK133701	5.61032	7.88e-07
6720422M22Rik	Mus musculus 12 days embryo male wolffian duct includes surrounding region cDNA, RIKEN full-length enriched library, clone:6720422M22 product:unclassifiable, full insert sequence [AK032738]	AK032738	5.58399	3.2e-08
Helt	Mus musculus Hey-like transcription factor (zebrafish) (Helt), mRNA [NM_173789]	NM_173789	5.58261	6.82e-16
Hps3	Mus musculus 0 day neonate thymus cDNA, RIKEN full-length enriched library, clone:A430107C19 product:Hermansky-Pudlak syndrome 3 homolog (human), full insert sequence. [AK079896]	AK079896	5.58067	0.00027
AK083178	Mus musculus adult male hippocampus cDNA, RIKEN full-length enriched library, clone:C630023P15 product:unclassifiable, full insert sequence. [AK083178]	AK083178	5.57454	5.43e-11
6330526H18Rik	Mus musculus adult male medulla oblongata cDNA, RIKEN full-length enriched library, clone:6330526H18 product:similar to NEPRILYSIN-LIKE PEPTIDASE GAMMA [Mus musculus], full insert sequence [AK018221]	AK018221	5.55233	0.00903
Ctnnal1	Mus musculus catenin (cadherin associated protein), alpha-like 1 (Ctnnal1), mRNA [NM_018761]	NM_018761	5.54913	7.2e-16
AK045389	Mus musculus adult male corpora quadrigemina cDNA, RIKEN full-length enriched library, clone:B230112D21 product:unclassifiable, full insert sequence [AK045389]	AK045389	5.53377	0.00913
AK046927	Mus musculus 10 days neonate cerebellum cDNA, RIKEN full-length enriched library, clone:B930003O19 product:unclassifiable, full insert sequence. [AK046927]	AK046927	5.52715	0.0091
Wipf3	PREDICTED: Mus musculus WAS [XM_620310]	AK078889	5.50377	8.2e-16
Ppt1	Mus musculus B16 F10Y cells cDNA, RIKEN full-length enriched library, clone:G370087F11 product:palmitoyl-protein thioesterase 1, full insert sequence. [AK148314]	AK148314	5.48926	3.01e-14
BC006770	Mus musculus LOC434536, mRNA (cDNA clone MGC:8099 IMAGE:3588650), complete cds. [BC006770]	BC006770	5.48645	6.49e-13
Dmrtc1a	Mus musculus DMRT-like family C1a (Dmrtc1a), transcript variant 2, mRNA [NM_029378]	NM_027591	5.48557	8.83e-16
Nags	Mus musculus N-acetylglutamate synthase (Nags), transcript variant 2, mRNA [NM_178053]	NM_178053	5.48324	9.91e-16
5430401H09Rik	Mus musculus 6 days neonate head cDNA, RIKEN full-length enriched library, clone:5430401H09 product:unclassifiable, full insert sequence [AK017255]	AK017255	5.48106	0.00957
2810021J22Rik	Mus musculus RIKEN cDNA 2810021J22 gene (2810021J22Rik), mRNA [NM_172403]	NM_172403	5.47928	0.00952
Pcsk1n	Mus musculus proprotein convertase subtilisin/kexin type 1 inhibitor (Pcsk1n), mRNA [NM_013892]	NM_013892	5.47753	8.89e-16
Minpp1	Mus musculus multiple inositol polyphosphate histidine phosphatase 1 (Minpp1), mRNA [NM_010799]	NM_010799	5.47223	9.9e-16
Nxnl2	Mus musculus nucleoredoxin-like 2 (Nxnl2), mRNA [NM_029173]	NM_029173	5.46195	9.48e-16
Cdk5	Mus musculus cyclin-dependent kinase 5 (Cdk5), mRNA [NM_007668]	NM_007668	5.46005	9.46e-16
Slc2a2	Mus musculus solute carrier family 2 (facilitated glucose transporter), member 2 (Slc2a2), mRNA [NM_031197]	NM_031197	5.45899	0.00097
Akr1b8	Mus musculus aldo-keto reductase family 1, member B8 (Akr1b8), mRNA [NM_008012]	NM_008012	5.45736	9.45e-16
Neo1	Mus musculus 13 days embryo lung cDNA, RIKEN full-length enriched library, clone:D430023D05 product:neogenin, full insert sequence. [AK052439]	AK052439	5.44136	6.1e-08
Phf8	Mus musculus PHD finger protein 8 (Phf8), transcript variant 2, mRNA [NM_001113354]	AK122447	5.43228	1.03e-15
Sh3gl2	Mus musculus SH3-domain GRB2-like 2 (Sh3gl2), mRNA [NM_019535]	NM_019535	5.42333	1.11e-15
Prss12	Mus musculus protease, serine, 12 neurotrypsin (motopsin) (Prss12), mRNA [NM_008939]	NM_008939	5.40459	1.19e-15
Fam148c	Mus musculus family with sequence similarity 148, member C (Fam148c), mRNA [NM_198614]	NM_198614	5.3627	1.43e-11
Snx7	Mus musculus 10 days neonate cortex cDNA, RIKEN full-length enriched library, clone:A830047E18 product:unclassifiable, full insert sequence [AK043893]	AK043893	5.35503	0.0013
Nsbp1	Mus musculus nucleosome binding protein 1 (Nsbp1), mRNA [NM_016710]	NM_016710	5.35442	1.34e-15
Sfrs17b	Mus musculus splicing factor, arginine/serine-rich 17b (Sfrs17b), mRNA [NM_001081956]	AK046007	5.3537	5.24e-15
Agpat4	Mus musculus 1-acylglycerol-3-phosphate O-acyltransferase 4 (lysophosphatidic acid acyltransferase, delta) (Agpat4), mRNA [NM_026644]	NM_026644	5.34967	1.33e-15
Abtb2	Mus musculus ankyrin repeat and BTB (POZ) domain containing 2 (Abtb2), mRNA [NM_178890]	NM_178890	5.34864	1.36e-15
D330027G24Rik	Mus musculus 13 days embryo heart cDNA, RIKEN full-length enriched library, clone:D330027G24 product:unclassifiable, full insert sequence [AK052318]	AK052318	5.34419	1.4e-15
AK087341	Mus musculus 0 day neonate lung cDNA, RIKEN full-length enriched library, clone:E030046L10 product:unclassifiable, full insert sequence. [AK087341]	AK087341	5.34328	2.11e-10
Ncoa2	Mus musculus nuclear receptor coactivator 2 (Ncoa2), transcript variant 1, mRNA [NM_008678]	AK028964	5.33389	2.11e-15
AK041272	Mus musculus adult male aorta and vein cDNA, RIKEN full-length enriched library, clone:A530096H12 product:unclassifiable, full insert sequence. [AK041272]	AK041272	5.31995	1e-05
Chchd10	Mus musculus coiled-coil-helix-coiled-coil-helix domain containing 10 (Chchd10), mRNA [NM_175329]	NM_175329	5.30882	1.51e-15
Kcng2	PREDICTED: Mus musculus potassium voltage-gated channel, subfamily G, member 2 (Kcng2), mRNA [XM_140499]	XM_140499	5.30651	3.58e-15
Ctsl	Mus musculus cathepsin L (Ctsl), mRNA [NM_009984]	NM_009984	5.29836	1.56e-15
Capn6	Mus musculus calpain 6 (Capn6), mRNA [NM_007603]	NM_007603	5.29406	1.8e-15
Kalrn	Mus musculus 2 days neonate thymus thymic cells cDNA, RIKEN full-length enriched library, clone:E430024L14 product:KALIRIN-12A homolog [Rattus norvegicus], full insert sequence. [AK088732]	AK088732	5.28832	1.71e-15
AK085206	Mus musculus 13 days embryo stomach cDNA, RIKEN full-length enriched library, clone:D530014A10 product:unclassifiable, full insert sequence. [AK085206]	AK085206	5.28306	2.49e-12
Arl4a	Mus musculus ADP-ribosylation factor-like 4A (Arl4a), transcript variant 2, mRNA [NM_001039515]	NM_007487	5.28131	1.2e-12
Ccdc75	Mus musculus adult male hippocampus cDNA, RIKEN full-length enriched library, clone:C630005A03 product:unclassifiable, full insert sequence. [AK049867]	AK049867	5.2813	9.32e-06
Prmt6	Mus musculus protein arginine N-methyltransferase 6 (Prmt6), mRNA [NM_178891]	AK034732	5.28025	4.84e-11
Dcbld1	Mus musculus discoidin, CUB and LCCL domain containing 1 (Dcbld1), mRNA [NM_025705]	BC026771	5.2751	6.58e-15
AK040820	Mus musculus adult male aorta and vein cDNA, RIKEN full-length enriched library, clone:A530027I12 product:unclassifiable, full insert sequence [AK040820]	AK040820	5.27201	1.66e-09
ENSMUST00000106746	helicase with zinc finger domain Gene [Source:MGI (curated);Acc:Helz-002] [ENSMUST00000106746]	AK020667	5.26994	2.04e-15
Clcn2	Mus musculus chloride channel CLC-2 (Clcn2) mRNA, complete cds. [AF097415]	NM_009900	5.2644	1.75e-15
Agpat4	Mus musculus 1-acylglycerol-3-phosphate O-acyltransferase 4 (lysophosphatidic acid acyltransferase, delta) (Agpat4), mRNA [NM_026644]	NM_026644	5.25925	1.78e-15
Zfp280c	Mus musculus zinc finger protein 280c (Zfp280c), mRNA [NM_153532]	NM_153532	5.25911	6.69e-15
Plce1	Mus musculus phospholipase C, epsilon 1 (Plce1), mRNA [NM_019588]	AK122521	5.25754	2.18e-12
Rnpc3	Mus musculus RNA-binding region (RNP1, RRM) containing 3 (Rnpc3), transcript variant 1, mRNA [NM_001038696]	NM_001038696	5.2512	7.89e-07
AK050249	Mus musculus adult male liver tumor cDNA, RIKEN full-length enriched library, clone:C730030P06 product:unclassifiable, full insert sequence. [AK050249]	AK050249	5.2492	6.63e-07
Zcchc18	Mus musculus zinc finger, CCHC domain containing 18 (Zcchc18), transcript variant 1, mRNA [NM_001035510]	NM_025893	5.24359	2.05e-15
Odz4	Mus musculus odd Oz/ten-m homolog 4 (Drosophila) (Odz4), mRNA [NM_011858]	AK147579	5.23997	6.23e-15
Alad	Mus musculus aminolevulinate, delta-, dehydratase (Alad), mRNA [NM_008525]	NM_008525	5.23738	1.91e-15
Aloxe3	Mus musculus arachidonate lipoxygenase 3 (Aloxe3), mRNA [NM_011786]	NM_011786	5.23375	3.54e-15
Fhod3	Mus musculus formin homology 2 domain containing 3 (Fhod3), mRNA [NM_175276]	NM_175276	5.23182	2.81e-08
5730419A17Rik	Mus musculus 8 days embryo whole body cDNA, RIKEN full-length enriched library, clone:5730419A17 product:unclassifiable, full insert sequence. [AK017574]	AK017574	5.22667	1.99e-10
Cblc	Mus musculus Casitas B-lineage lymphoma c (Cblc), mRNA [NM_023224]	NM_023224	5.21201	0.00019
Lsr	Mus musculus lipolysis stimulated lipoprotein receptor (Lsr), mRNA [NM_017405]	NM_017405	5.211	2.09e-15
Ctnnal1	Mus musculus 13 days embryo male testis cDNA, RIKEN full-length enriched library, clone:6030402G09 product:catenin alpha-like 1, full insert sequence. [AK077879]	AK077879	5.20829	5.01e-11
Raly	Mus musculus hnRNP-associated with lethal yellow (Raly), transcript variant 2, mRNA [NM_023130]	NM_023130	5.20504	2.13e-15
Grm8	Mus musculus glutamate receptor, metabotropic 8 (Grm8), mRNA [NM_008174]	NM_008174	5.20067	0.00095
Cct4	Mus musculus 10 days embryo whole body cDNA, RIKEN full-length enriched library, clone:2610204B21 product:unclassifiable, full insert sequence [AK011873]	AK011873	5.19789	2.06e-10
Fkbp15	Mus musculus mRNA for mKIAA0674 protein [AK122343]	AK122343	5.192	7.17e-12
Pdgfc	Mus musculus platelet-derived growth factor, C polypeptide (Pdgfc), mRNA [NM_019971]	NM_019971	5.18808	2.99e-15
AK085108	Mus musculus 13 days embryo lung cDNA, RIKEN full-length enriched library, clone:D430037I24 product:unclassifiable, full insert sequence. [AK085108]	AK085108	5.18493	3.43e-14
Nobox	Mus musculus NOBOX oogenesis homeobox (Nobox), mRNA [NM_130869]	NM_130869	5.17886	4.71e-08
3110035E14Rik	Mus musculus RIKEN cDNA 3110035E14 gene (3110035E14Rik), mRNA [NM_178399]	NM_178399	5.16841	3.59e-15
Pdgfc	Mus musculus platelet-derived growth factor, C polypeptide (Pdgfc), mRNA [NM_019971]	NM_019971	5.15389	4.12e-15
Grb14	Mus musculus adult male diencephalon cDNA, RIKEN full-length enriched library, clone:9330158P05 product:unclassifiable, full insert sequence [AK034134]	AK034134	5.15243	5.75e-06
Rab11fip1	Mus musculus RAB11 family interacting protein 1 (class I) (Rab11fip1), mRNA [NM_001080813]	XM_134088	5.15208	7.29e-15
Txk	Mus musculus mRNA, one isoform of PTK-RL18. [D83202]	NM_013698	5.15016	2.91e-10
Sdf4	Mus musculus stromal cell derived factor 4 (Sdf4), mRNA [NM_011341]	NM_011341	5.14814	1e-05
AK079702	Mus musculus 0 day neonate thymus cDNA, RIKEN full-length enriched library, clone:A430019E01 product:unclassifiable, full insert sequence. [AK079702]	AK079702	5.1472	2e-05
Slc11a2	Mus musculus B16 F10Y cells cDNA, RIKEN full-length enriched library, clone:G370074D17 product:solute carrier family 11 (proton-coupled divalent metal ion transporters), member 2, full insert sequence. [AK148276]	AK148276	5.14456	2.89e-15
AK052354	Mus musculus 13 days embryo heart cDNA, RIKEN full-length enriched library, clone:D330037B11 product:unclassifiable, full insert sequence. [AK052354]	AK052354	5.1412	0.00024
Wnk3	PREDICTED: Mus musculus WNK lysine deficient protein kinase 3, transcript variant 3 (Wnk3), mRNA [XM_909586]	XM_909586	5.13715	0.00011
2810011L19Rik	Mus musculus RIKEN cDNA 2810011L19 gene, mRNA (cDNA clone IMAGE:6810678), partial cds [BC059025]	BC059025	5.13378	0.00116
9130011L11Rik	Mus musculus adult male cecum cDNA, RIKEN full-length enriched library, clone:9130011L11 product:unclassifiable, full insert sequence. [AK018612]	AK018612	5.12586	0.00014
2310057J16Rik	Mus musculus RIKEN cDNA 2310057J16 gene (2310057J16Rik), mRNA [NM_027171]	NM_027171	5.12541	2.88e-15
Npr1	Mus musculus natriuretic peptide receptor 1 (Npr1), mRNA [NM_008727]	NM_008727	5.12395	2.58e-14
Tmem64	Mus musculus NOD-derived CD11c +ve dendritic cells cDNA, RIKEN full-length enriched library, clone:F630113L19 product:Similar to LD47277p homolog [Mus musculus], full insert sequence [AK170682]	AK170682	5.11759	3.02e-15
Ddr1	Mus musculus Cak receptor kinase mRNA, complete cds. [L57509]	NM_007584	5.11514	2.93e-15
Nfat5	Mus musculus nuclear factor of activated T-cells 5 (Nfat5), transcript variant a, mRNA [NM_133957]	NM_133957	5.1065	3.03e-15
Chrdl2	Mus musculus chordin-like 2 (Chrdl2), mRNA [NM_133709]	NM_133709	5.10632	2.34e-12
Rgmb	Mus musculus RGM domain family, member B (Rgmb), mRNA [NM_178615]	NM_178615	5.09336	6.29e-09
Tox	Mus musculus thymocyte selection-associated high mobility group box (Tox), mRNA [NM_145711]	NM_145711	5.08677	8.57e-15
Wtap	Mus musculus Wilms' tumour 1-associating protein (Wtap), transcript variant 2, mRNA [NM_175394]	AK041341	5.0743	0.0013
Rab31	Mus musculus RAB31, member RAS oncogene family (Rab31), mRNA [NM_133685]	NM_133685	5.06672	3.45e-15
BC021891	Mus musculus cDNA sequence BC021891 (BC021891), mRNA [NM_145608]	NM_145608	5.06368	4.88e-15
Fam60a	Mus musculus family with sequence similarity 60, member A (Fam60a), mRNA [NM_019643]	NM_019643	5.05919	3.93e-15
Dock7	Mus musculus dedicator of cytokinesis 7, mRNA (cDNA clone IMAGE:3595169), with apparent retained intron. [BC006868]	BC006868	5.05869	1.76e-14
4930502E18Rik	Mus musculus adult male testis cDNA, RIKEN full-length enriched library, clone:4930502E18 product:hypothetical protein, full insert sequence. [AK015678]	AK015678	5.0561	3.95e-15
Rian	Mus musculus 10 days neonate head cDNA, RIKEN full-length enriched library, clone:5530401N18 product:unclassifiable, full insert sequence. [AK017440]	AK017440	5.05359	1.13e-13
L3mbtl4	Mus musculus l(3)mbt-like 4 (Drosophila) (L3mbtl4), mRNA [NM_177278]	AK139210	5.05296	4.87e-15
4921513D23Rik	Mus musculus adult male testis cDNA, RIKEN full-length enriched library, clone:4921513D23 product:unclassifiable, full insert sequence [AK076566]	AV254721	5.04183	4.66e-15
Lrrc16b	Mus musculus leucine rich repeat containing 16B (Lrrc16b), mRNA [NM_001024645]	NM_001024645	5.03748	1.43e-12
Obsl1	Mus musculus obscurin-like 1 (Obsl1), mRNA [NM_178884]	AK029863	5.03685	3.82e-15
Pappa	Mus musculus pregnancy-associated plasma protein A (Pappa), mRNA [NM_021362]	NM_021362	5.0332	4.04e-15
D330040H18Rik	Mus musculus 13 days embryo heart cDNA, RIKEN full-length enriched library, clone:D330040H18 product:unclassifiable, full insert sequence. [AK084765]	AK084765	5.03287	4.86e-07
Gja1	Mus musculus gap junction protein, alpha 1 (Gja1), mRNA [NM_010288]	NM_010288	5.03224	0
Epb4.1l3	Mus musculus erythrocyte protein band 4.1-like 3 (Epb4.1l3), mRNA [NM_013813]	NM_013813	5.02296	4.76e-15
AK084342	Mus musculus 12 days embryo eyeball cDNA, RIKEN full-length enriched library, clone:D230028C15 product:unclassifiable, full insert sequence. [AK084342]	AK084342	5.01215	2e-05
Cnnm1	Mus musculus cyclin M1 (Cnnm1), mRNA [NM_031396]	NM_031396	5.0079	1.15e-12
Srgap3	Mus musculus SLIT-ROBO Rho GTPase activating protein 3 (Srgap3), mRNA [NM_080448]	NM_153070	5.00224	4.49e-15
Zfp2	Mus musculus zinc finger protein 2 (Zfp2), transcript variant 3, mRNA [NM_001044697]	NM_009550	5.00029	4e-05
Arnt2	Mus musculus aryl hydrocarbon receptor nuclear translocator 2 (Arnt2), mRNA [NM_007488]	NM_007488	4.99705	2.65e-11
Intu	Mus musculus inturned planar cell polarity effector homolog (Drosophila) (Intu), mRNA [NM_175515]	NM_175515	4.99396	2.02e-11
AK090164	Mus musculus 1 month neonate cerebellum cDNA, RIKEN full-length enriched library, clone:G630008M03 product:unclassifiable, full insert sequence [AK090164]	AK090164	4.98449	5.3e-10
Ing2	Mus musculus inhibitor of growth family, member 2 (Ing2), mRNA [NM_023503]	NM_023503	4.97698	2.83e-14
Ahsg	Mus musculus alpha-2-HS-glycoprotein (Ahsg), mRNA [NM_013465]	NM_013465	4.96637	5.31e-15
Gpr55	Mus musculus G protein-coupled receptor 55 (Gpr55), mRNA [NM_001033290]	NM_001033290	4.96598	3.74e-13
Defb19	Mus musculus defensin beta 19 (Defb19), mRNA [NM_145157]	NM_145157	4.96294	4.97e-15
Fxyd6	Mus musculus FXYD domain-containing ion transport regulator 6 (Fxyd6), mRNA [NM_022004]	NM_022004	4.94733	5.26e-15
AK050694	Mus musculus 9 days embryo whole body cDNA, RIKEN full-length enriched library, clone:D030005A19 product:unclassifiable, full insert sequence. [AK050694]	AK050694	4.92842	1.4e-06
Tarsl2	Mus musculus threonyl-tRNA synthetase-like 2 (Tarsl2), mRNA [NM_172310]	NM_172310	4.9275	6.58e-15
Mfap3	Mus musculus microfibrillar-associated protein 3 (Mfap3), transcript variant 1, mRNA [NM_145426]	NM_145426	4.91522	1.4e-14
Wnk4	Mus musculus WNK lysine deficient protein kinase 4 (Wnk4), mRNA [NM_175638]	NM_175638	4.9098	7.71e-15
Gprasp1	Mus musculus G protein-coupled receptor associated sorting protein 1 (Gprasp1), transcript variant 1, mRNA [NM_026081]	NM_026081	4.90892	6.08e-15
Flrt1	Mus musculus fibronectin leucine rich transmembrane protein 1 (Flrt1), mRNA [NM_201411]	NM_201411	4.9082	8.78e-14
Zc3h15	Mus musculus 9 days embryo whole body cDNA, RIKEN full-length enriched library, clone:D030019D23 product:unclassifiable, full insert sequence [AK050782]	AK050782	4.90239	2.41e-08
Ildr2	Mus musculus strain BALB [FJ024494]		4.89287	1e-05
Ly6h	Mus musculus lymphocyte antigen 6 complex, locus H (Ly6h), transcript variant 1, mRNA [NM_011837]	NM_011837	4.89199	0.00521
Serpina5	Mus musculus serine (or cysteine) peptidase inhibitor, clade A, member 5 (Serpina5), mRNA [NM_172953]	NM_172953	4.89072	6.5e-15
Agtr2	Mus musculus angiotensin II receptor, type 2 (Agtr2), mRNA [NM_007429]	NM_007429	4.88912	0.00151
Faf1	Mus musculus Fas-associated factor 1 (Faf1), mRNA [NM_007983]	NM_007983	4.88727	3.99e-08
Cartpt	Mus musculus CART prepropeptide (Cartpt), transcript variant 1, mRNA [NM_013732]	NM_013732	4.88479	7.37e-10
Cdh23	Mus musculus cadherin 23 (otocadherin) (Cdh23), mRNA [NM_023370]	NM_023370	4.88128	1.26e-14
TC1642195	HS1005F21 {Homo sapiens} (exp=0; wgp=1; cg=0), partial (24%) [TC1642195]		4.86793	1.49e-11
EG436193	PREDICTED: Mus musculus predicted gene, EG436193 (EG436193), mRNA [XM_488319]	XM_488319	4.85293	7.77e-14
ENSMUST00000109982	RIKEN cDNA A230067G21 gene Gene [Source:MGI Symbol;Acc:MGI:3036245] [ENSMUST00000109982]	AK038838	4.84667	2.71e-06
Ube2e3	Mus musculus 7 days neonate cerebellum cDNA, RIKEN full-length enriched library, clone:A730096E21 product:unclassifiable, full insert sequence [AK043446]	AK043446	4.83895	2.57e-09
Ppat	PREDICTED: Mus musculus phosphoribosyl pyrophosphate amidotransferase, transcript variant 3 (Ppat), mRNA [XM_896000]	XM_896000	4.83864	1.02e-14
St8sia2	Mus musculus ST8 alpha-N-acetyl-neuraminide alpha-2,8-sialyltransferase 2 (St8sia2), mRNA [NM_009181]	NM_009181	4.83559	8.52e-14
Mbnl3	Mus musculus muscleblind-like 3 (Drosophila) (Mbnl3), mRNA [NM_134163]	NM_134163	4.83558	1.77e-08
AK086244	Mus musculus 15 days embryo head cDNA, RIKEN full-length enriched library, clone:D930016B19 product:unclassifiable, full insert sequence. [AK086244]	AK086244	4.83533	4.91e-14
Baiap2l1	Mus musculus BAI1-associated protein 2-like 1 (Baiap2l1), mRNA [NM_025833]	NM_025833	4.82996	3.3e-13
Mlxipl	Mus musculus MLX interacting protein-like (Mlxipl), mRNA [NM_021455]	NM_021455	4.82775	8.4e-15
Tnfrsf11b	Mus musculus tumor necrosis factor receptor superfamily, member 11b (osteoprotegerin) (Tnfrsf11b), mRNA [NM_008764]	NM_008764	4.82572	1.23e-09
Polr3g	Mus musculus polymerase (RNA) III (DNA directed) polypeptide G (Polr3g), mRNA [NM_001081176]	BC066818	4.82455	9.35e-15
A_52_P852833	Unknown		4.82343	8.95e-15
Zfp536	Mus musculus zinc finger protein 536 (Zfp536), mRNA [NM_172385]	NM_172385	4.82291	8.95e-15
Cecr2	Mus musculus cat eye syndrome chromosome region, candidate 2 homolog (human) (Cecr2), mRNA [NM_001128151]	XM_204234	4.81741	6.39e-08
AW121567	Mus musculus expressed sequence AW121567 (AW121567), mRNA [NM_173446]	NM_173446	4.81459	6.96e-09
Serpina5	Mus musculus serine (or cysteine) peptidase inhibitor, clade A, member 5 (Serpina5), mRNA [NM_172953]	NM_172953	4.81447	1.16e-14
TC1644415	Q8R4C3_CRIGR (Q8R4C3) Csr1, partial (43%) [TC1644415]		4.81391	4e-05
Rarres1	PREDICTED: Mus musculus retinoic acid receptor responder (tazarotene induced) 1 (Rarres1), mRNA [XM_001475793]	XM_130987	4.81253	9.59e-15
Rnf144a	Mus musculus ring finger protein 144A (Rnf144a), transcript variant 2, mRNA [NM_080563]	NM_080563	4.80823	1.04e-14
Plekha6	Mus musculus 13 days embryo heart cDNA, RIKEN full-length enriched library, clone:D330010I17 product:unclassifiable, full insert sequence. [AK084512]	BC025841	4.8077	1.73e-14
6530401N04Rik	Mus musculus adult male hypothalamus cDNA, RIKEN full-length enriched library, clone:A230085P07 product:unclassifiable, full insert sequence. [AK039019]	AK039019	4.8062	0.004
TC1634523	Q5GGR3_9GENT (Q5GGR3) Maturase K (Fragment), partial (4%) [TC1634523]		4.80389	1.2e-14
Tmem132c	Mus musculus transmembrane protein 132C (Tmem132c), mRNA [NM_175432]	AK157823	4.79998	9.04e-06
BG921888	BG921888 602820664F1 NCI_CGAP_Mam6 Mus musculus cDNA clone IMAGE:4949630 5', mRNA sequence [BG921888]	BG921888	4.79881	1.29e-14
Dmrtc1b	Mus musculus DMRT-like family C1b (Dmrtc1b), mRNA [NM_001039116]	NM_001039116	4.78759	5.57e-14
Yy2	Mus musculus Yy2 transcription factor (Yy2), mRNA [NM_001098723]	NM_178266	4.7863	1.64e-11
Pnkd	Mus musculus paroxysmal nonkinesiogenic dyskinesia (Pnkd), transcript variant 3, mRNA [NM_001039509]	NM_019999	4.75868	1.24e-14
AK053110	Mus musculus 0 day neonate lung cDNA, RIKEN full-length enriched library, clone:E030002N07 product:unclassifiable, full insert sequence. [AK053110]	AK053110	4.75133	1.09e-06
Rnd3	Mus musculus Rho family GTPase 3 (Rnd3), mRNA [NM_028810]	NM_028810	4.7493	4.88e-12
Spock2	Mus musculus sparc/osteonectin, cwcv and kazal-like domains proteoglycan 2, mRNA (cDNA clone MGC:64727 IMAGE:6838067), complete cds. [BC060210]	BC060210	4.73695	1.19e-14
Tnni3	Mus musculus troponin I, cardiac 3 (Tnni3), mRNA [NM_009406]	NM_009406	4.73404	1.19e-14
Tom1l1	Mus musculus 9 days embryo whole body cDNA, RIKEN full-length enriched library, clone:D030056H14 product:ADAPTOR MOLECULE SRCASM, full insert sequence. [AK083630]	AK083630	4.72239	0.00405
Slc26a7	Mus musculus solute carrier family 26, member 7 (Slc26a7), mRNA [NM_145947]	NM_145947	4.71999	7.6e-09
Zmat4	Mus musculus zinc finger, matrin type 4 (Zmat4), mRNA [NM_177086]	NM_177086	4.71488	6.91e-11
BC063263	Mus musculus cDNA sequence BC063263, mRNA (cDNA clone IMAGE:6417495) [BC063263]	XM_485924	4.71438	1.69e-09
Utp18	Mus musculus UTP18, small subunit (SSU) processome component, homolog (yeast) (Utp18), mRNA [NM_001013375]	NM_001013375	4.71424	3.12e-06
E330021A06Rik	Mus musculus 2 days pregnant adult female ovary cDNA, RIKEN full-length enriched library, clone:E330021A06 product:unclassifiable, full insert sequence. [AK054377]	AK054377	4.70797	9.76e-09
Cited4	Mus musculus Cbp/p300-interacting transactivator, with Glu/Asp-rich carboxy-terminal domain, 4 (Cited4), mRNA [NM_019563]	NM_019563	4.7053	1.43e-14
AK033596	Mus musculus adult male cecum cDNA, RIKEN full-length enriched library, clone:9130022E12 product:hypothetical protein, full insert sequence. [AK033596]	AK033596	4.69554	6.13e-07
Basp1	Mus musculus brain abundant, membrane attached signal protein 1 (Basp1), mRNA [NM_027395]	NM_027395	4.69333	1.42e-14
Scara5	Mus musculus scavenger receptor class A, member 5 (putative) (Scara5), mRNA [NM_028903]	NM_028903	4.68973	1.45e-14
Cgn	Mus musculus adult male medulla oblongata cDNA, RIKEN full-length enriched library, clone:6330408J11 product:similar to CINGULIN [Homo sapiens], full insert sequence. [AK018143]	AK018143	4.68788	4.13e-14
Slc25a18	Mus musculus solute carrier family 25 (mitochondrial carrier), member 18 (Slc25a18), nuclear gene encoding mitochondrial protein, mRNA [NM_001081048]	XM_110620	4.68032	2.56e-14
Bex4	Mus musculus brain expressed gene 4 (Bex4), mRNA [NM_212457]	NM_212457	4.67748	1.49e-14
Zfp385b	Mus musculus zinc finger protein 385B (Zfp385b), transcript variant 1, mRNA [NM_178723]	NM_178723	4.67663	4.16e-14
Gart	Mus musculus 13 days embryo liver cDNA, RIKEN full-length enriched library, clone:I920021A03 product:phosphoribosylglycinamide formyltransferase, full insert sequence. [AK168445]	AK168445	4.67574	1.76e-14
AK039775	Mus musculus adult male spinal cord cDNA, RIKEN full-length enriched library, clone:A330106F13 product:unclassifiable, full insert sequence. [AK039775]	AK039775	4.67026	8.81e-06
BC057602	Mus musculus cDNA clone MGC:67258 IMAGE:6413648, complete cds [BC057602]	BC021831	4.66799	7.16e-14
Atp11b	Mus musculus ATPase, class VI, type 11B (Atp11b), mRNA [NM_029570]	NM_029570	4.66773	1.64e-14
Ccnb3	Mus musculus cyclin B3 (Ccnb3), mRNA [NM_183015]	NM_183015	4.6643	1.95e-11
Aff2	Mus musculus AF4/FMR2 family, member 2 (Aff2), mRNA [NM_008032]	NM_008032	4.6608	0.00756
Ipo11	Mus musculus importin 11 (Ipo11), mRNA [NM_029665]	NM_029665	4.65474	0.00495
Slc27a6	Mus musculus solute carrier family 27 (fatty acid transporter), member 6 (Slc27a6), mRNA [NM_001081072]	AK028699	4.65354	1.31e-13
Hmgn1	Mus musculus 7 days neonate cerebellum cDNA, RIKEN full-length enriched library, clone:A730012H23 product:unclassifiable, full insert sequence [AK080436]	AK080436	4.65341	5.71e-10
Fam62c	Mus musculus family with sequence similarity 62, member C (Fam62c), mRNA [NM_177775]	NM_177775	4.65306	1.89e-14
8030451F13Rik	Mus musculus RIKEN cDNA 8030451F13 gene (8030451F13Rik), mRNA [NM_175418]	NM_175418	4.65136	4.69e-10
Enc1	Mus musculus ectodermal-neural cortex 1 (Enc1), mRNA [NM_007930]	NM_007930	4.64941	1.69e-14
Zic3	Mus musculus zinc finger protein of the cerebellum 3 (Zic3), mRNA [NM_009575]	NM_009575	4.64688	1.36e-10
Gpr125	Mus musculus G protein-coupled receptor 125, mRNA (cDNA clone IMAGE:5718990), partial cds. [BC052391]	BC052391	4.64648	1.73e-14
Sema3c	Mus musculus sema domain, immunoglobulin domain (Ig), short basic domain, secreted, (semaphorin) 3C (Sema3c), mRNA [NM_013657]	NM_013657	4.64517	4.06e-13
Wfdc1	Mus musculus WAP four-disulfide core domain 1 (Wfdc1), mRNA [NM_023395]	NM_023395	4.64245	1.73e-14
Zfp113	Mus musculus zinc finger protein 113 (Zfp113), mRNA [NM_019747]	NM_019747	4.64199	0.0001
A330049M08Rik	Mus musculus RIKEN cDNA A330049M08 gene (A330049M08Rik), mRNA [NM_145555]	NM_145555	4.63266	1.47e-13
Defb19	Mus musculus defensin beta 19 (Defb19), mRNA [NM_145157]	NM_145157	4.63146	1.8e-14
Smarca5	Mus musculus SWI/SNF related, matrix associated, actin dependent regulator of chromatin, subfamily a, member 5 (Smarca5), mRNA [NM_053124]	NM_053124	4.62435	8.54e-14
Zfp398	Mus musculus zinc finger protein 398 (Zfp398), transcript variant 1, mRNA [NM_027477]	NM_027477	4.61484	2.26e-09
Sdc4	Mus musculus syndecan 4 (Sdc4), mRNA [NM_011521]	NM_011521	4.61286	1.96e-14
A130054J05Rik	Mus musculus 10 days neonate cerebellum cDNA, RIKEN full-length enriched library, clone:6530426K03 product:similar to NEPRILYSIN-LIKE PEPTIDASE GAMMA [Mus musculus], full insert sequence [AK078376]	AK078376	4.60508	4.19e-07
E130104P22Rik	Mus musculus 0 day neonate eyeball cDNA, RIKEN full-length enriched library, clone:E130104P22 product:unclassifiable, full insert sequence [AK053520]	AK053520	4.60504	3.38e-08
1810058I24Rik	Mus musculus 0 day neonate cerebellum cDNA, RIKEN full-length enriched library, clone:C230016J21 product:unclassifiable, full insert sequence. [AK082166]	AK082166	4.59043	7.28e-14
F3	Mus musculus coagulation factor III (F3), mRNA [NM_010171]	NM_010171	4.5702	2.82e-14
AK087765	Mus musculus 2 days pregnant adult female ovary cDNA, RIKEN full-length enriched library, clone:E330018C22 product:unclassifiable, full insert sequence. [AK087765]	AK087765	4.56465	5.56e-13
Gpr176	Mus musculus G protein-coupled receptor 176 (Gpr176), mRNA [NM_201367]	NM_201367	4.54863	0.00095
AK079697	Mus musculus 0 day neonate thymus cDNA, RIKEN full-length enriched library, clone:A430018C08 product:unclassifiable, full insert sequence. [AK079697]	AK079697	4.54781	2e-05
Inha	Mus musculus inhibin alpha (Inha), mRNA [NM_010564]	NM_010564	4.5475	2.56e-14
Acot6	acyl-CoA thioesterase 6 Gene [Source:MGI (curated);Acc:Acot6-001] [ENSMUST00000056822]	XM_126946	4.54052	1.65e-13
Cited1	Mus musculus Cbp/p300-interacting transactivator with Glu/Asp-rich carboxy-terminal domain 1 (Cited1), mRNA [NM_007709]	NM_007709	4.5338	2.71e-14
Mccc2	Mus musculus methylcrotonoyl-Coenzyme A carboxylase 2 (beta) (Mccc2), nuclear gene encoding mitochondrial protein, mRNA [NM_030026]	NM_030026	4.53049	1.2e-07
Sobp	Mus musculus sine oculis-binding protein homolog (Drosophila) (Sobp), mRNA [NM_175407]	BC058972	4.5246	2.85e-14
D3Ertd300e	Mus musculus 9.5 days embryo parthenogenote cDNA, RIKEN full-length enriched library, clone:B130033J21 product:transcription factor (p38 interacting protein), full insert sequence. [AK045110]	AK045110	4.5232	2.39e-11
AK044145	Mus musculus 10 days neonate cortex cDNA, RIKEN full-length enriched library, clone:A830094P16 product:unclassifiable, full insert sequence. [AK044145]	AK044145	4.523	0.00014
Neo1	UGS01_13_K03.x1 FH UGS01 Mus musculus cDNA clone UGS01_13_K03 similar to Neogenin, mRNA sequence [DV067942]	AK019159	4.52205	4.55e-14
Camkk2	Mus musculus 9 days embryo whole body cDNA, RIKEN full-length enriched library, clone:D030025I01 product:unclassifiable, full insert sequence [AK050846]	AK050846	4.50665	3.13e-14
Krtap17-1	Mus musculus keratin associated protein 17-1 (Krtap17-1), mRNA [NM_001099774]	CK791701	4.50589	5.23e-14
Tmem132e	Mus musculus transmembrane protein 132E (Tmem132e), mRNA [NM_023438]	NM_023438	4.50182	1.36e-13
Dtx1	Mus musculus deltex 1 homolog (Drosophila) (Dtx1), mRNA [NM_008052]	NM_008052	4.50141	3.13e-14
Fzd7	Mus musculus frizzled homolog 7 (Drosophila) (Fzd7), mRNA [NM_008057]	NM_008057	4.50019	5e-12
Eif2c3	Mus musculus eukaryotic translation initiation factor 2C, 3, mRNA (cDNA clone IMAGE:6409378) [BC060127]	BC060127	4.49457	7.77e-06
Stx1a	Mus musculus syntaxin 1A (brain) (Stx1a), mRNA [NM_016801]	NM_016801	4.49164	3.65e-14
Lactb	Mus musculus lactamase, beta (Lactb), nuclear gene encoding mitochondrial protein, mRNA [NM_030717]	NM_030717	4.48695	1.15e-13
Jub	Mus musculus ajuba (Jub), mRNA [NM_010590]	NM_010590	4.48535	3.61e-14
AK145625	Mus musculus blastocyst blastocyst cDNA, RIKEN full-length enriched library, clone:I1C0023K09 product:hypothetical protein, full insert sequence. [AK145625]	AK145625	4.48401	3.15e-11
T	Mus musculus brachyury (T), mRNA [NM_009309]	NM_009309	4.4832	3.88e-40
C920016K16Rik	Mus musculus 2 days neonate thymus thymic cells cDNA, RIKEN full-length enriched library, clone:C920016K16 product:unclassifiable, full insert sequence. [AK050612]	AK050612	4.48292	1.17e-06
ENSMUST00000067526	RIKEN cDNA 9430021M05 gene Gene [Source:MGI Symbol;Acc:MGI:1924538] [ENSMUST00000067526]	AK020430	4.48174	0.00102
Hs6st2	Mus musculus 13 days embryo male testis cDNA, RIKEN full-length enriched library, clone:6030470D11 product:heparan sulfate 6-O-sulfotransferase 2, full insert sequence. [AK031649]	AK031649	4.47574	8.03e-13
Glis3	Mus musculus GLIS family zinc finger 3 (Glis3), mRNA [NM_175459]	NM_175459	4.47167	0.00011
D730040F13Rik	Mus musculus 0 day neonate kidney cDNA, RIKEN full-length enriched library, clone:D630016F07 product:Hypothetical metalthio containing protein, full insert sequence. [AK085364]	AK085364	4.46784	4.36e-11
ENSMUST00000106746	helicase with zinc finger domain Gene [Source:MGI (curated);Acc:Helz-002] [ENSMUST00000106746]	AK020667	4.46643	3.67e-14
Gnptg	Mus musculus adult male olfactory brain cDNA, RIKEN full-length enriched library, clone:6430527N14 product:hypothetical Extracytoplasmic domain of cation-dependent mannose 6-phosphate receptor structure containing protein, full insert sequence. [AK078230]	AK078230	4.46431	5e-07
Nacc1	Mus musculus nucleus accumbens associated 1, BEN and BTB (POZ) domain containing (Nacc1), mRNA [NM_025788]	NM_025788	4.46329	1e-05
Svs6	Mus musculus seminal vesicle secretory protein 6 (Svs6), mRNA [NM_013679]	NM_013679	4.46122	4.72e-13
Ormdl3	Mus musculus ORM1-like 3 (S. cerevisiae) (Ormdl3), mRNA [NM_025661]	NM_025661	4.46061	3.73e-14
BC057022	Mus musculus cDNA sequence BC057022 (BC057022), mRNA [NM_001004180]	NM_001004180	4.45442	4.13e-14
AK139420	Mus musculus 10 days neonate cortex cDNA, RIKEN full-length enriched library, clone:A830058K05 product:hypothetical protein, full insert sequence. [AK139420]	AK038239	4.45374	0.00314
AI608034	va01g01.y1 Soares mouse lymph node NbMLN Mus musculus cDNA clone IMAGE:721680 5'. [AI608034]	AI608034	4.45096	2.94e-10
BC068157	Mus musculus cDNA sequence BC068157 (BC068157), mRNA [NM_207203]	NM_207203	4.45057	0.00319
Il17re	Mus musculus interleukin 17 receptor E (Il17re), transcript variant 1, mRNA [NM_145826]	NM_145826	4.4482	4.17e-14
2310047O13Rik	Mus musculus 12 days embryo spinal cord cDNA, RIKEN full-length enriched library, clone:C530040B18 product:Brain MY042 protein, full insert sequence. [AK049694]	AK049694	4.44417	3.39e-12
Adora1	Mus musculus adenosine A1 receptor (Adora1), transcript variant 1, mRNA [NM_001008533]	NM_001008533	4.42907	1.56e-13
Rap2b	Mus musculus RAP2B, member of RAS oncogene family (Rap2b), mRNA [NM_028712]	NM_028712	4.42594	3.68e-13
1110012J17Rik	Mus musculus 12 days embryo spinal ganglion cDNA, RIKEN full-length enriched library, clone:D130071O13 product:hypothetical protein, full insert sequence. [AK051750]	AK051750	4.42136	4.53e-14
Smpx	Mus musculus small muscle protein, X-linked (Smpx), mRNA [NM_025357]	NM_025357	4.41897	4.5e-14
EG433882	Mus musculus adult male urinary bladder cDNA, RIKEN full-length enriched library, clone:9530096H18 product:itchy, full insert sequence [AK035725]	XM_888349	4.40814	5.11e-11
Pdk3	Mus musculus pyruvate dehydrogenase kinase, isoenzyme 3 (Pdk3), mRNA [NM_145630]	NM_145630	4.40775	4.82e-14
AK031518	Mus musculus 13 days embryo male testis cDNA, RIKEN full-length enriched library, clone:6030446P15 product:unclassifiable, full insert sequence. [AK031518]	AK031518	4.40709	1.66e-09
Bnc1	Mus musculus basonuclin 1 (Bnc1), mRNA [NM_007562]	NM_007562	4.40491	9.78e-14
Gpr56	Mus musculus G protein-coupled receptor 56 (Gpr56), mRNA [NM_018882]	NM_018882	4.40329	4.83e-14
AK087419	Mus musculus 0 day neonate eyeball cDNA, RIKEN full-length enriched library, clone:E130016M22 product:unclassifiable, full insert sequence. [AK087419]	AK087419	4.39611	2.01e-10
Zfp251	Mus musculus zinc finger protein 251 (Zfp251), mRNA [NM_001007568]	NM_001007568	4.39314	2.55e-08
Thoc2	Mus musculus 2 days pregnant adult female ovary cDNA, RIKEN full-length enriched library, clone:E330009A14 product:unclassifiable, full insert sequence. [AK054273]	AK054273	4.39015	8e-05
U90926	Mus musculus putative TNF-resistance related protein mRNA, complete cds [U90926]	XM_888097	4.38915	1.64e-13
Atp1b1	Mus musculus ATPase, Na+/K+ transporting, beta 1 polypeptide (Atp1b1), mRNA [NM_009721]	NM_009721	4.38729	5.2e-14
Lphn1	Mus musculus latrophilin 1 (Lphn1), mRNA [NM_181039]	NM_181039	4.38726	5.17e-14
Ubtf	Mus musculus upstream binding transcription factor, RNA polymerase I (Ubtf), transcript variant 1, mRNA [NM_011551]	NM_011551	4.38381	5.32e-14
Thbs1	Mus musculus thrombospondin 1 (Thbs1), mRNA [NM_011580]	NM_011580	4.38291	2.31e-07
AI314180	Mus musculus adult male pituitary gland cDNA, RIKEN full-length enriched library, clone:5330403M13 product:hypothetical ARM repeat structure containing protein, full insert sequence. [AK030369]	AK030369	4.38005	1.17e-08
AK053079	Mus musculus 15 days embryo head cDNA, RIKEN full-length enriched library, clone:D930045I23 product:unclassifiable, full insert sequence. [AK053079]	AK053079	4.37692	6e-05
Zfp334	Mus musculus zinc finger protein 334 (Zfp334), mRNA [NM_178411]	NM_178411	4.37328	3.07e-08
Mlxipl	Mus musculus Mlx interactor zeta (Mio) mRNA, complete cds, alternatively spliced [AF245475]	AF245475	4.37024	3.06e-13
Marcksl1	Mus musculus MARCKS-like 1 (Marcksl1), mRNA [NM_010807]	NM_010807	4.36929	5.62e-14
4933427D06Rik	Mus musculus RIKEN cDNA 4933427D06 gene (4933427D06Rik), mRNA [NM_175017]	NM_175017	4.36757	3.46e-13
Ociad2	Mus musculus OCIA domain containing 2 (Ociad2), mRNA [NM_026950]	NM_026950	4.3661	1.11e-12
St3gal3	Mus musculus ST3 beta-galactoside alpha-2,3-sialyltransferase 3 (St3gal3), mRNA [NM_009176]	NM_009176	4.36465	1.44e-11
AK042829	Mus musculus 7 days neonate cerebellum cDNA, RIKEN full-length enriched library, clone:A730028E04 product:hypothetical protein, full insert sequence. [AK042829]	AK042829	4.36296	4.51e-11
Hs6st2	Mus musculus heparan sulfate 6-O-sulfotransferase 2 (Hs6st2), transcript variant 1, mRNA [NM_001077202]	NM_015819	4.36163	1.63e-13
1110036O03Rik	Mus musculus RIKEN cDNA 1110036O03 gene (1110036O03Rik), mRNA [NM_176830]	NM_176830	4.36095	5.99e-14
Mat2a	Mus musculus methionine adenosyltransferase II, alpha (Mat2a), mRNA [NM_145569]	NM_145569	4.36035	5.84e-14
2310068C19Rik	Mus musculus adult male tongue cDNA, RIKEN full-length enriched library, clone:2310068C19 product:unclassifiable, full insert sequence. [AK010104]	AK010104	4.34548	4.83e-13
B630019K06Rik	Mus musculus RIKEN cDNA B630019K06 gene (B630019K06Rik), mRNA [NM_175327]	NM_175327	4.34239	8.71e-14
Slc24a3	Mus musculus solute carrier family 24 (sodium/potassium/calcium exchanger), member 3 (Slc24a3), mRNA [NM_053195]	NM_053195	4.33929	6.86e-14
Tspyl2	Mus musculus TSPY-like 2 (Tspyl2), mRNA [NM_029836]	NM_029836	4.33894	6.58e-14
BC023744	Mus musculus cDNA sequence BC023744 (BC023744), mRNA [NM_001033311]	BC023744	4.33127	8.31e-14
AK032921	Mus musculus 12 days embryo male wolffian duct includes surrounding region cDNA, RIKEN full-length enriched library, clone:6720473C09 product:small nuclear ribonucleoprotein polypeptide A', full insert sequence. [AK032921]	AK032921	4.3271	1.05e-12
Mtap9	Mus musculus microtubule-associated protein 9 (Mtap9), mRNA [NM_001081230]	XM_485258	4.32643	4.54e-12
B3galt1	Mus musculus UDP-Gal:betaGlcNAc beta 1,3-galactosyltransferase, polypeptide 1 (B3galt1), mRNA [NM_020283]	NM_020283	4.3227	5.39e-08
9630019E01Rik	Mus musculus 12 days embryo spinal ganglion cDNA, RIKEN full-length enriched library, clone:D130045C05 product:unclassifiable, full insert sequence. [AK051384]	AK051384	4.32228	2.09e-13
Rnd2	Mus musculus Rho family GTPase 2 (Rnd2), mRNA [NM_009708]	NM_009708	4.31948	7.44e-14
0610010D20Rik	Mus musculus RIKEN cDNA 0610010D20 gene (0610010D20Rik), mRNA [NM_026152]	NM_026152	4.31624	4.4e-13
AK029965	Mus musculus adult male testis cDNA, RIKEN full-length enriched library, clone:4932411G08 product:unclassifiable, full insert sequence. [AK029965]	AK029965	4.31485	2.29e-13
Klf11	Mus musculus Kruppel-like factor 11 (Klf11), mRNA [NM_178357]	NM_178357	4.31179	3.84e-13
Ubtf	Mus musculus upstream binding transcription factor, RNA polymerase I (Ubtf), transcript variant 1, mRNA [NM_011551]	NM_011551	4.30802	7.49e-14
Dnahc5	Mus musculus dynein, axonemal, heavy chain 5 (Dnahc5), mRNA [NM_133365]	AK034139	4.30633	9.31e-07
Wfdc6a	Mus musculus WAP four-disulfide core domain 6A (Wfdc6a), mRNA [NM_001033240]	NM_001033240	4.29795	8.4e-14
Stat1	Mus musculus 3 days neonate thymus cDNA, RIKEN full-length enriched library, clone:A630023O21 product:hypothetical protein, full insert sequence. [AK041599]	AK041599	4.29482	1.03e-13
Nt5c3	Mus musculus 5'-nucleotidase, cytosolic III (Nt5c3), mRNA [NM_026004]	NM_026004	4.29224	8.36e-14
AK035983	Mus musculus 16 days neonate cerebellum cDNA, RIKEN full-length enriched library, clone:9630024L03 product:RIKEN cDNA 4631403P03 gene, full insert sequence. [AK035983]	AK035983	4.28982	9e-05
Arpp19	Mus musculus cAMP-regulated phosphoprotein 19 (Arpp19), transcript variant 1, mRNA [NM_021548]	NM_021548	4.28935	6.15e-09
Ppt1	Mus musculus palmitoyl-protein thioesterase 1 (Ppt1), mRNA [NM_008917]	AK153316	4.28777	8.19e-14
Ranbp17	Mus musculus 10 days neonate medulla oblongata cDNA, RIKEN full-length enriched library, clone:B830038L20 product:RAN binding protein 17, full insert sequence. [AK046865]	AK046865	4.28758	3e-05
Gprasp1	Mus musculus G protein-coupled receptor associated sorting protein 1 (Gprasp1), transcript variant 1, mRNA [NM_026081]	NM_026081	4.28686	2.67e-11
Abcc1	Mus musculus ATP-binding cassette, sub-family C (CFTR/MRP), member 1 (Abcc1), mRNA [NM_008576]	NM_008576	4.28505	8.57e-14
AK081094	Mus musculus 10 days neonate cerebellum cDNA, RIKEN full-length enriched library, clone:B930085E10 product:unclassifiable, full insert sequence. [AK081094]	AK081094	4.28461	2.93e-09
6430598A04Rik	Mus musculus RIKEN cDNA 6430598A04 gene (6430598A04Rik), mRNA [NM_175521]	NM_175521	4.2806	1.34e-13
Xpo6	Mus musculus 2 days neonate thymus thymic cells cDNA, RIKEN full-length enriched library, clone:E430016I24 product:unclassifiable, full insert sequence. [AK088433]	AK088433	4.27778	2.71e-09
Usp27x	Mus musculus 12 days embryo head cDNA, RIKEN full-length enriched library, clone:3002003A21 product:ubiquitin specific protease 27, X chromosome, full insert sequence [AK028249]	NM_019461	4.27599	7.71e-09
Kazald1	Mus musculus Kazal-type serine peptidase inhibitor domain 1 (Kazald1), mRNA [NM_178929]	NM_178929	4.2737	8.82e-14
AW488341	UI-M-BH3-arp-d-07-0-UI.s1 NIH_BMAP_M_S4 Mus musculus cDNA clone UI-M-BH3-arp-d-07-0-UI 3'. [AW488341]	AW488341	4.27299	1.66e-06
Cycs	Mus musculus cytochrome c, somatic (Cycs), nuclear gene encoding mitochondrial protein, mRNA [NM_007808]	NM_007808	4.27172	8.9e-14
E130308A19Rik	Mus musculus RIKEN cDNA E130308A19 gene (E130308A19Rik), transcript variant 1, mRNA [NM_153158]	NM_153158	4.27026	9.01e-14
Ptpre	Mus musculus protein tyrosine phosphatase, receptor type, E (Ptpre), mRNA [NM_011212]	NM_011212	4.26863	9.15e-14
Scrn2	Mus musculus secernin 2 (Scrn2), mRNA [NM_146027]	NM_146027	4.26734	1.39e-13
Mex3b	PREDICTED: Mus musculus ring finger and KH domain containing 3 (Rkhd3), mRNA [XM_620516]	XM_620516	4.26723	1.02e-13
AK035263	Mus musculus adult male urinary bladder cDNA, RIKEN full-length enriched library, clone:9530006N05 product:unclassifiable, full insert sequence. [AK035263]	AK035263	4.25731	9.72e-08
AK039892	Mus musculus 0 day neonate thymus cDNA, RIKEN full-length enriched library, clone:A430025G19 product:unclassifiable, full insert sequence. [AK039892]	AK039892	4.25455	2.06e-12
4633401B06Rik	Mus musculus 0 day neonate skin cDNA, RIKEN full-length enriched library, clone:4633401B06 product:unclassifiable, full insert sequence [AK014609]	AK014609	4.25294	4.3e-12
8030431J09Rik	Mus musculus 2 days neonate thymus thymic cells cDNA, RIKEN full-length enriched library, clone:E430014L16 product:unclassifiable, full insert sequence [AK088394]	AK033113	4.25257	1.11e-13
Agfg2	Mus musculus ArfGAP with FG repeats 2 (Agfg2), transcript variant 1, mRNA [NM_145566]	NM_145566	4.25195	2.85e-12
Cbfa2t2	Mus musculus adult male pituitary gland cDNA, RIKEN full-length enriched library, clone:5330436J07 product:unclassifiable, full insert sequence. [AK030597]	AK030597	4.24844	5e-05
Eif2c3	Mus musculus eukaryotic translation initiation factor 2C, 3, mRNA (cDNA clone IMAGE:6409378) [BC060127]	BC060127	4.24798	0.00597
Cycs	Mus musculus cytochrome c, somatic (Cycs), nuclear gene encoding mitochondrial protein, mRNA [NM_007808]	NM_007808	4.24717	9.98e-14
Ppp1r9a	Mus musculus protein phosphatase 1, regulatory (inhibitor) subunit 9A (Ppp1r9a), mRNA [NM_181595]	NM_181595	4.24418	1.01e-13
Rhou	Mus musculus ras homolog gene family, member U (Rhou), mRNA [NM_133955]	NM_133955	4.24208	1.03e-13
Slc44a2	Mus musculus solute carrier family 44, member 2 (Slc44a2), mRNA [NM_152808]	NM_152808	4.24089	1.05e-13
Ctnna2	Mus musculus 12 days embryo embryonic body between diaphragm region and neck cDNA, RIKEN full-length enriched library, clone:9430076K22 product:hypothetical Vinculin and alpha-catenin containing protein, full insert sequence. [AK035033]	AK035033	4.23739	1.42e-12
CO802710	AGENCOURT_30288440 NIH_MGC_257 Mus musculus cDNA clone IMAGE:30930506 5', mRNA sequence [CO802710]	CO802710	4.23717	1.77e-12
Bex1	Mus musculus brain expressed gene 1 (Bex1), mRNA [NM_009052]	NM_009052	4.23649	1.1e-13
Gstm7	Mus musculus glutathione S-transferase, mu 7 (Gstm7), mRNA [NM_026672]	BC051924	4.21833	1.17e-13
1600012F09Rik	Mus musculus adult male pituitary gland cDNA, RIKEN full-length enriched library, clone:5330414I06 product:unclassifiable, full insert sequence [AK030455]	AK030455	4.21731	2.13e-07
Peo1	Mus musculus progressive external ophthalmoplegia 1 (human) (Peo1), mRNA [NM_153796]	NM_153796	4.21175	0.00079
D430030G11Rik	Mus musculus 13 days embryo lung cDNA, RIKEN full-length enriched library, clone:D430030G11 product:unclassifiable, full insert sequence [AK085051]	AK085051	4.21032	1.36e-06
Plekhf1	Mus musculus pleckstrin homology domain containing, family F (with FYVE domain) member 1 (Plekhf1), mRNA [NM_024413]	NM_024413	4.20777	1.76e-13
Tmem20	Mus musculus transmembrane protein 20 (Tmem20), mRNA [NM_175507]	NM_175507	4.2069	1.32e-13
Mex3b	PREDICTED: Mus musculus ring finger and KH domain containing 3 (Rkhd3), mRNA [XM_620516]	XM_620516	4.20605	1.34e-13
Cdh3	Mus musculus cadherin 3 (Cdh3), transcript variant 2, mRNA [NM_007665]	NM_007665	4.20331	1.92e-08
Trim6	Mus musculus tripartite motif-containing 6 (Trim6), mRNA [NM_001013616]	NM_001013616	4.20285	1.86e-10
Htatsf1	Mus musculus HIV TAT specific factor 1 (Htatsf1), mRNA [NM_028242]	NM_028242	4.19941	1.25e-13
Smarca5	Mus musculus SWI/SNF related, matrix associated, actin dependent regulator of chromatin, subfamily a, member 5 (Smarca5), mRNA [NM_053124]	NM_053124	4.19662	3.23e-13
C230029D21Rik	Mus musculus 7 days embryo whole body cDNA, RIKEN full-length enriched library, clone:C430017B21 product:unclassifiable, full insert sequence. [AK049490]	AK049490	4.19396	3e-05
Plekhg1	Mus musculus mRNA for mKIAA1209 protein [AK122468]	AK122468	4.19393	1.38e-13
Ttyh1	Mus musculus tweety homolog 1 (Drosophila) (Ttyh1), transcript variant 2, mRNA [NM_021324]	NM_021324	4.19164	1.47e-13
AK053080	Mus musculus 15 days embryo head cDNA, RIKEN full-length enriched library, clone:D930045J11 product:unclassifiable, full insert sequence. [AK053080]	AK053080	4.18763	4e-05
Lrrc16a	Mus musculus 12 days embryo spinal ganglion cDNA, RIKEN full-length enriched library, clone:D130057M20 product:hypothetical protein, full insert sequence. [AK051570]	AK051570	4.18672	4.61e-13
Rras2	Mus musculus related RAS viral (r-ras) oncogene homolog 2 (Rras2), mRNA [NM_025846]	NM_025846	4.18659	1.33e-13
Ubap2l	Mus musculus mRNA for mKIAA0144 protein. [AK122210]	AK122210	4.18511	0.00075
Brwd1	bromodomain and WD repeat domain containing 1 Gene [Source:MGI (curated);Acc:Brwd1-002] [ENSMUST00000113829]	AK086927	4.17933	2.03e-13
Uba6	Mus musculus 8 days embryo whole body cDNA, RIKEN full-length enriched library, clone:5730469D23 product:unclassifiable, full insert sequence [AK017687]	AK017687	4.1786	5.07e-08
Serpina3a	Mus musculus serine (or cysteine) peptidase inhibitor, clade A, member 3A, mRNA (cDNA clone MGC:74171 IMAGE:30280343), complete cds. [BC063325]	BC063325	4.17373	2.21e-13
AK037075	Mus musculus adult female vagina cDNA, RIKEN full-length enriched library, clone:9930108O06 product:hypothetical protein, full insert sequence. [AK037075]	AK037075	4.17363	4.26e-10
Cul4b	Mus musculus cullin 4B (Cul4b), transcript variant 2, mRNA [NM_001110142]	AK164640	4.17096	1.55e-13
Prrg4	Mus musculus proline rich Gla (G-carboxyglutamic acid) 4 (transmembrane) (Prrg4), mRNA [NM_178695]	NM_178695	4.16584	0.00014
Usp53	Mus musculus ubiquitin specific peptidase 53, mRNA (cDNA clone IMAGE:4236151), partial cds [BC022221]	BC022221	4.16441	2.27e-13
4930402E16Rik	Mus musculus adult male tongue cDNA, RIKEN full-length enriched library, clone:2310076G07 product:unclassifiable, full insert sequence [AK160524]	AK160524	4.16196	1.57e-13
Mtmr1	Mus musculus myotubularin related protein 1 (Mtmr1), mRNA [NM_016985]	NM_016985	4.15809	1.6e-06
Enpp2	Mus musculus ectonucleotide pyrophosphatase/phosphodiesterase 2 (Enpp2), transcript variant 2, mRNA [NM_015744]	NM_015744	4.15709	1.57e-13
F3	Mus musculus coagulation factor III (F3), mRNA [NM_010171]	NM_010171	4.15594	3.21e-13
Dpp3	Mus musculus 0 day neonate thymus cDNA, RIKEN full-length enriched library, clone:A430037M23 product:similar to DIPEPTIDYL-PEPTIDASE III (EC 3.4.14.4) (DPP III) (DIPEPTIDYL AMINOPEPTIDASE III) (DIPEPTIDYL ARYLAMIDASE III) [Rattus norvegicus], full insert sequence. [AK039975]	AK039975	4.15437	0.00022
Aqp8	Mus musculus aquaporin 8 (Aqp8), transcript variant 1, mRNA [NM_007474]	NM_007474	4.15207	1.58e-13
Ears2	Mus musculus mRNA for mKIAA1970 protein [AK129469]	AK129469	4.15174	3.16e-07
Ppm1l	Mus musculus protein phosphatase 1 (formerly 2C)-like (Ppm1l), mRNA [NM_178726]	NM_178726	4.15116	1.65e-13
AK054054	Mus musculus 2 days pregnant adult female oviduct cDNA, RIKEN full-length enriched library, clone:E230015E12 product:unclassifiable, full insert sequence. [AK054054]	AK054054	4.14783	1.42e-11
Sema4d	Mus musculus sema domain, immunoglobulin domain (Ig), transmembrane domain (TM) and short cytoplasmic domain, (semaphorin) 4D (Sema4d), mRNA [NM_013660]	NM_013660	4.14761	1.95e-06
Myo10	Mus musculus myosin X (Myo10), mRNA [NM_019472]	AK122371	4.1437	1.66e-13
P2ry1	Mus musculus purinergic receptor P2Y, G-protein coupled 1 (P2ry1), mRNA [NM_008772]	NM_008772	4.14286	5.43e-09
3110068A07Rik	Mus musculus 13 days embryo head cDNA, RIKEN full-length enriched library, clone:3110068A07 product:unclassifiable, full insert sequence. [AK014240]	AK014240	4.14113	1.06e-07
2410002F23Rik	Mus musculus RIKEN cDNA 2410002F23 gene, mRNA (cDNA clone MGC:69849 IMAGE:6821248), complete cds. [BC059896]	NM_025880	4.1393	1.69e-13
Schip1	Mus musculus schwannomin interacting protein 1 (Schip1), transcript variant 4, mRNA [NM_013928]	NM_013928	4.13755	1.77e-12
Calr4	Mus musculus calreticulin 4 (Calr4), mRNA [NM_001033226]	NM_001033226	4.13528	9.12e-13
Trim26	Mus musculus tripartite motif-containing 26 (Trim26), transcript variant 1, mRNA [NM_001025599]	NM_001025599	4.13417	1.8e-13
Ctnnal1	Mus musculus catenin (cadherin associated protein), alpha-like 1 (Ctnnal1), mRNA [NM_018761]	NM_018761	4.13143	5.59e-12
Prmt6	Mus musculus protein arginine N-methyltransferase 6 (Prmt6), mRNA [NM_178891]	AK034732	4.12927	2.65e-12
Defb36	Mus musculus defensin beta 36 (Defb36), mRNA [NM_001037247]	NM_001037247	4.12883	1.78e-13
Cycs	Mus musculus cytochrome c, somatic (Cycs), nuclear gene encoding mitochondrial protein, mRNA [NM_007808]	NM_007808	4.12808	1.78e-13
AK085586	Mus musculus 0 day neonate kidney cDNA, RIKEN full-length enriched library, clone:D630044D14 product:unclassifiable, full insert sequence. [AK085586]	AK085586	4.12794	7.93e-07
AK051125	Mus musculus 12 days embryo spinal ganglion cDNA, RIKEN full-length enriched library, clone:D130001P16 product:unclassifiable, full insert sequence. [AK051125]	AK051125	4.12516	1e-05
Sat2	Mus musculus spermidine/spermine N1-acetyl transferase 2 (Sat2), mRNA [NM_026991]	BC061227	4.1246	1.84e-13
Usp34	Mus musculus adult male aorta and vein cDNA, RIKEN full-length enriched library, clone:A530081C03 product:unclassifiable, full insert sequence. [AK041081]	AK041081	4.12409	0.00108
Susd3	Mus musculus sushi domain containing 3 (Susd3), mRNA [NM_025491]	NM_025491	4.12342	1.82e-13
Zfp385b	Mus musculus adult male urinary bladder cDNA, RIKEN full-length enriched library, clone:9530027H21 product:unclassifiable, full insert sequence [AK035378]	AK035378	4.12108	2.19e-13
Tnni3	Mus musculus troponin I, cardiac 3 (Tnni3), mRNA [NM_009406]	NM_009406	4.11641	1.89e-13
Gata6	Mus musculus GATA binding protein 6 (Gata6), mRNA [NM_010258]	NM_010258	4.1159	5.48e-13
A_52_P996776	Unknown		4.11203	1.33e-08
Nhsl1	Mus musculus NHS-like 1 (Nhsl1), mRNA [NM_173390]	NM_173390	4.11046	2.13e-13
AK043448	Mus musculus 7 days neonate cerebellum cDNA, RIKEN full-length enriched library, clone:A730096G18 product:unclassifiable, full insert sequence [AK043448]	AK043448	4.10711	7.37e-13
Mark4	Mus musculus 17 days embryo stomach cDNA, RIKEN full-length enriched library, clone:I920055D13 product:MAP/microtubule affinity-regulating kinase 4, full insert sequence. [AK146784]	AK146784	4.10191	2.04e-13
1110059G10Rik	Mus musculus RIKEN cDNA 1110059G10 gene (1110059G10Rik), mRNA [NM_025419]	NM_025419	4.09718	0.001
6720475J19Rik	Mus musculus 12 days embryo male wolffian duct includes surrounding region cDNA, RIKEN full-length enriched library, clone:6720475J19 product:hypothetical protein, full insert sequence [AK020160]	XM_983620	4.09472	2.16e-13
Ss18l1	Mus musculus synovial sarcoma translocation gene on chromosome 18-like 1 (Ss18l1), mRNA [NM_178750]	NM_178750	4.09271	1.94e-11
AK081298	Mus musculus 16 days embryo head cDNA, RIKEN full-length enriched library, clone:C130001K16 product:unclassifiable, full insert sequence [AK081298]	AK081298	4.08658	1.31e-11
1600029D21Rik	Mus musculus RIKEN cDNA 1600029D21 gene (1600029D21Rik), mRNA [NM_029639]	NM_029639	4.08554	0.00096
Lhx1	Mus musculus 0 day neonate cerebellum cDNA, RIKEN full-length enriched library, clone:C230045C03 product:LIM homeobox protein 1, full insert sequence [AK141086]	AK141086	4.08367	5.66e-11
Cadm1	Mus musculus cell adhesion molecule 1 (Cadm1), transcript variant 1, mRNA [NM_207675]	NM_207676	4.08031	2.28e-13
Nt5c3	Mus musculus 5'-nucleotidase, cytosolic III (Nt5c3), mRNA [NM_026004]	NM_026004	4.08001	2.28e-13
Appbp2	Mus musculus mRNA for mKIAA0228 protein [AK122222]	AK122222	4.07898	2.36e-13
Tmem29	PREDICTED: Mus musculus transmembrane protein 29, transcript variant 2 (Tmem29), mRNA [XM_898013]	XM_898013	4.07518	2.46e-13
Ubqln2	Mus musculus ubiquilin 2 (Ubqln2), mRNA [NM_018798]	NM_018798	4.07366	2.72e-13
Epdr1	Mus musculus ependymin related protein 1 (zebrafish) (Epdr1), mRNA [NM_134065]	NM_134065	4.07305	3.91e-11
A230067G21Rik	Mus musculus RIKEN cDNA A230067G21 gene (A230067G21Rik), mRNA [NM_001033348]	BC096528	4.07232	1.5e-11
Camkk2	Mus musculus calcium/calmodulin-dependent protein kinase kinase 2, beta (Camkk2), mRNA [NM_145358]	NM_145358	4.07163	2.38e-13
Fat1	Mus musculus FAT tumor suppressor homolog 1 (Drosophila) (Fat1), mRNA [NM_001081286]	XM_885736	4.0715	2.38e-13
Alkbh8	Mus musculus alkB, alkylation repair homolog 8 (E. coli) (Alkbh8), mRNA [NM_026303]	NM_026303	4.07104	0.00043
Magea6	Mus musculus melanoma antigen, family A, 6 (Magea6), mRNA [NM_020019]	NM_020019	4.06982	1.6e-12
Las1l	Mus musculus LAS1-like (S. cerevisiae) (Las1l), mRNA [NM_152822]	NM_152822	4.06822	3.09e-13
Zfp704	Mus musculus zinc finger protein 704 (Zfp704), mRNA [NM_133218]	NM_133218	4.065	5.39e-13
AK038517	Mus musculus adult male hypothalamus cDNA, RIKEN full-length enriched library, clone:A230021O03 product:acetyl-Coenzyme A synthetase 2, full insert sequence. [AK038517]	AK038517	4.06208	1.26e-09
Pdk1	Mus musculus 2 days pregnant adult female ovary cDNA, RIKEN full-length enriched library, clone:E330005M21 product:hypothetical protein, full insert sequence. [AK165090]	AK165090	4.05851	3.26e-13
4930588G05Rik	Mus musculus adult male testis cDNA, RIKEN full-length enriched library, clone:4930588G05 product:unclassifiable, full insert sequence. [AK019832]	AK019832	4.05586	6.68e-13
Bbx	Mus musculus bobby sox homolog (Drosophila) (Bbx), mRNA [NM_027444]	AK131987	4.05217	2.77e-13
Spnb3	Mus musculus spectrin beta 3 (Spnb3), mRNA [NM_021287]	NM_021287	4.0517	3.27e-13
Eif2s2	Mus musculus 3 days neonate thymus cDNA, RIKEN full-length enriched library, clone:A630051M08 product:unclassifiable, full insert sequence [AK042004]	AK042004	4.04892	1.68e-11
Tnik	Mus musculus TRAF2 and NCK interacting kinase, mRNA (cDNA clone IMAGE:6333274), containing frame-shift errors. [BC050866]	BC050866	4.04253	1.91e-07
Evl	Mus musculus Ena-vasodilator stimulated phosphoprotein (Evl), mRNA [NM_007965]	NM_007965	4.03957	2.8e-13
Clcn2	Mus musculus chloride channel 2 (Clcn2), mRNA [NM_009900]	NM_009900	4.03728	2.84e-13
Nags	Mus musculus N-acetylglutamate synthase (Nags), transcript variant 1, mRNA [NM_145829]	NM_145829	4.03489	2.03e-12
Zfp711	Mus musculus zinc finger protein 711 (Zfp711), mRNA [NM_177747]	AK013051	4.03444	1.1e-12
Med12l	Mus musculus mRNA for mKIAA1635 protein [AK129412]	AK129412	4.03382	5e-05
5430416O09Rik	Mus musculus RIKEN cDNA 5430416O09 gene (5430416O09Rik), mRNA [NM_027789]	NM_027789	4.03101	1.17e-12
Fzd3	Mus musculus frizzled homolog 3 (Drosophila) (Fzd3), mRNA [NM_021458]	NM_021458	4.02825	4.61e-12
Plxna3	Mus musculus plexin A3 (Plxna3), mRNA [NM_008883]	AK049319	4.0221	6.4e-12
2010011I20Rik	Mus musculus RIKEN cDNA 2010011I20 gene (2010011I20Rik), mRNA [NM_025912]	NM_025912	4.02175	2.28e-11
AK048541	Mus musculus 16 days embryo head cDNA, RIKEN full-length enriched library, clone:C130071D07 product:ATPase, Cu++ transporting, alpha polypeptide, full insert sequence. [AK048541]	AK048541	4.02025	2.86e-07
6530401D17Rik	Mus musculus 10 days neonate cerebellum cDNA, RIKEN full-length enriched library, clone:6530401D17 product:similar to MICROSOMAL SIGNAL PEPTIDASE 23 KDA SUBUNIT (EC 3.4.-.-) (SPASE 22 KDA SUBUNIT) (SPC22 [AK018307]	NM_029541	4.01705	1.01e-11
L3mbtl4	Mus musculus l(3)mbt-like 4 (Drosophila) (L3mbtl4), mRNA [NM_177278]	NM_177278	4.01577	3.98e-13
Rhox6	Mus musculus reproductive homeobox 6 (Rhox6), mRNA [NM_008955]	NM_008955	4.0151	0.00236
Arhgef4	Mus musculus Rho guanine nucleotide exchange factor (GEF) 4 (Arhgef4), mRNA [NM_183019]	NM_183019	4.01234	4.39e-13
Narg1l	Mus musculus NMDA receptor regulated 1-like (Narg1l), mRNA [NM_025832]	NM_025832	4.00998	2.41e-12
Snx33	Mus musculus sorting nexin 33 (Snx33), mRNA [NM_175483]	NM_175483	4.00962	3.37e-13
Dtwd2	Mus musculus DTW domain containing 2 (Dtwd2), mRNA [NM_026854]	AK144689	4.00819	9.01e-09
Frmpd1	Mus musculus FERM and PDZ domain containing 1 (Frmpd1), mRNA [NM_001081172]	XM_204152	4.00804	3.53e-13
Zfp583	Mus musculus zinc finger protein 583 (Zfp583), mRNA [NM_001033249]	BC056221	4.00385	1.61e-08
Usp31	Mus musculus mRNA for mKIAA1203 protein. [AK122466]	AK122466	3.99858	6.56e-13
Clock	Mus musculus adult male pituitary gland cDNA, RIKEN full-length enriched library, clone:5330400M04 product:circadian locomoter output cycles kaput, full insert sequence. [AK030352]	AK030352	3.995	4.16e-13
Ppfia3	Mus musculus protein tyrosine phosphatase, receptor type, f polypeptide (PTPRF), interacting protein (liprin), alpha 3 (Ppfia3), mRNA [NM_029741]	NM_029741	3.99493	1.85e-12
Jakmip1	Mus musculus janus kinase and microtubule interacting protein 1 (Jakmip1), mRNA [NM_178394]	NM_178394	3.99277	5.18e-13
AK047739	Mus musculus adult male corpus striatum cDNA, RIKEN full-length enriched library, clone:C030020B06 product:unclassifiable, full insert sequence [AK047739]	AK047739	3.99062	4.58e-13
Trip12	Mus musculus 3 days neonate thymus cDNA, RIKEN full-length enriched library, clone:A630051D19 product:unclassifiable, full insert sequence. [AK041991]	AK041991	3.98998	1e-05
Hoxb9	Mus musculus homeo box B9 (Hoxb9), mRNA [NM_008270]	AK078860	3.98907	5.13e-13
Cdh1	Mus musculus cadherin 1 (Cdh1), mRNA [NM_009864]	NM_009864	3.98769	2.26e-34
Ldhd	Mus musculus lactate dehydrogenase D (Ldhd), nuclear gene encoding mitochondrial protein, mRNA [NM_027570]	NM_027570	3.98569	9e-05
Cdh2	Mus musculus 0 day neonate eyeball cDNA, RIKEN full-length enriched library, clone:E130014I11 product:unclassifiable transcript, full insert sequence. [AK087418]	AK087418	3.98454	0.00224
Fam169a	Mus musculus mRNA for mKIAA0888 protein [AK173051]	XM_619141	3.98408	7.03e-13
Six6os1	Mus musculus adult retina cDNA, RIKEN full-length enriched library, clone:A930037I21 product:unclassifiable, full insert sequence. [AK044729]	AK044729	3.98112	1e-05
AK052777	Mus musculus 0 day neonate kidney cDNA, RIKEN full-length enriched library, clone:D630049N15 product:unclassifiable, full insert sequence [AK052777]	XM_484197	3.98052	2.37e-06
Fmo4	Mus musculus flavin containing monooxygenase 4 (Fmo4), mRNA [NM_144878]	NM_144878	3.98029	0.00035
AK081170	Mus musculus 10 days neonate cerebellum cDNA, RIKEN full-length enriched library, clone:B930095K20 product:unclassifiable, full insert sequence. [AK081170]	AK081170	3.97027	0.00624
AK171738	Mus musculus activated spleen cDNA, RIKEN full-length enriched library, clone:F830008B05 product:hypothetical protein, full insert sequence. [AK171738]	AK171738	3.96992	1e-05
AV328302	AV328302 RIKEN full-length enriched, adult male medulla oblongata Mus musculus cDNA clone 6330441A18 3'. [AV328302]	AK031889	3.96728	4.46e-12
4833419E13Rik	Mus musculus 0 day neonate head cDNA, RIKEN full-length enriched library, clone:4833419E13 product:inferred: RIKEN cDNA 4833419E13 gene, full insert sequence [AK014724]	AK014724	3.96631	0.00235
A930012O16Rik	Mus musculus 3 days neonate thymus cDNA, RIKEN full-length enriched library, clone:A630039N14 product:hypothetical protein, full insert sequence [AK169486]	NM_175463	3.96558	6.93e-10
Grin2c	Mus musculus glutamate receptor, ionotropic, NMDA2C (epsilon 3) (Grin2c), mRNA [NM_010350]	NM_010350	3.96416	1.07e-12
Mycn	Mus musculus v-myc myelocytomatosis viral related oncogene, neuroblastoma derived (avian) (Mycn), mRNA [NM_008709]	NM_008709	3.96245	0.00019
Tmtc2	Mus musculus 13 days embryo heart cDNA, RIKEN full-length enriched library, clone:D330034A10 product:hypothetical TPR repeat containing protein, full insert sequence. [AK052344]	AK052344	3.96092	0.00209
Kcnh3	Mus musculus potassium voltage-gated channel, subfamily H (eag-related), member 3 (Kcnh3), mRNA [NM_010601]	NM_010601	3.95746	1.39e-06
Slc44a2	Mus musculus solute carrier family 44, member 2 (Slc44a2), mRNA [NM_152808]	NM_152808	3.95697	4.38e-13
Zdhhc2	Mus musculus zinc finger, DHHC domain containing 2 (Zdhhc2), mRNA [NM_178395]	NM_178395	3.95251	5.53e-13
Sipa1l1	Mus musculus adult male brain UNDEFINED_CELL_LINE cDNA, RIKEN full-length enriched library, clone:M5C1085H19 product:signal-induced proliferation-associated 1 like 1, full insert sequence [AK147591]	AK147591	3.95127	7.59e-10
D130067P18Rik	Mus musculus 12 days embryo spinal ganglion cDNA, RIKEN full-length enriched library, clone:D130067P18 product:unclassifiable, full insert sequence. [AK051729]	AK051729	3.95126	0.00028
AK169742	Mus musculus 2 days neonate thymus thymic cells cDNA, RIKEN full-length enriched library, clone:E430016M08 product:glyceraldehyde-3-phosphate dehydrogenase, full insert sequence. [AK169742]	AK169742	3.95102	6.24e-09
Kctd14	Mus musculus potassium channel tetramerisation domain containing 14 (Kctd14), transcript variant 2, mRNA [NM_001012434]	NM_001010826	3.95022	8.59e-13
Rgmb	Mus musculus RGM domain family, member B, mRNA (cDNA clone MGC:106503 IMAGE:6821755), complete cds [BC096024]	BC096024	3.95016	6.55e-13
Fam13b	Mus musculus RIKEN cDNA 2610024E20 gene, mRNA (cDNA clone IMAGE:4951363), complete cds. [BC029030]	BC029030	3.94685	4.62e-13
Lingo4	Mus musculus leucine rich repeat and Ig domain containing 4 (Lingo4), mRNA [NM_177250]	NM_177250	3.94397	2.85e-06
Adk	Mus musculus adenosine kinase (Adk), mRNA [NM_134079]	NM_134079	3.93914	4.78e-13
Hcfc1	Mus musculus host cell factor C1 (Hcfc1), mRNA [NM_008224]	NM_008224	3.93798	4.54e-12
4930550L24Rik	Mus musculus RIKEN cDNA 4930550L24 gene (4930550L24Rik), mRNA [NM_023774]	BC087920	3.93262	5.19e-13
Nsbp1	Mus musculus nucleosome binding protein 1 (Nsbp1), mRNA [NM_016710]	NM_016710	3.92835	5.07e-13
Tmprss13	Mus musculus transmembrane protease, serine 13 (Tmprss13), mRNA [NM_001013373]	NM_001013373	3.92369	2e-07
Arhgef18	Mus musculus rho/rac guanine nucleotide exchange factor (GEF) 18 (Arhgef18), mRNA [NM_133962]	NM_133962	3.92367	5.31e-13
Wbscr27	Mus musculus Williams Beuren syndrome chromosome region 27 (human) (Wbscr27), mRNA [NM_024479]	NM_024479	3.92146	4.76e-12
Ppm1l	Mus musculus cDNA, RIKEN full-length enriched library, clone:M5C1026H21 product:protein phosphatase 1 (formerly 2C)-like, full insert sequence [AK147389]	AK147389	3.91817	5.56e-13
Cbara1	Mus musculus calcium binding atopy-related autoantigen 1 (Cbara1), mRNA [NM_144822]	NM_144822	3.91703	5.58e-13
2310028O11Rik	PREDICTED: Mus musculus RIKEN cDNA 2310028O11 gene, transcript variant 3 (2310028O11Rik), mRNA [XM_901483]	XM_901483	3.9155	7.6e-09
Crls1	Mus musculus 11 days embryo gonad cDNA, RIKEN full-length enriched library, clone:7030418E13 product:unclassifiable, full insert sequence [AK078599]	AK078599	3.91482	1.66e-11
Mtap7	Mus musculus microtubule-associated protein 7 (Mtap7), mRNA [NM_008635]	BC052637	3.91412	6.12e-13
Klf16	Mus musculus Kruppel-like factor 16 (Klf16), mRNA [NM_078477]	NM_078477	3.9128	7.84e-13
AK028771	Mus musculus 10 days neonate skin cDNA, RIKEN full-length enriched library, clone:4732455C24 product:unclassifiable, full insert sequence. [AK028771]	AK028771	3.91113	0.00025
Pbld	Mus musculus phenazine biosynthesis-like protein domain containing (Pbld), mRNA [NM_026701]	NM_026701	3.9098	3.43e-09
1190007F08Rik	Mus musculus adult inner ear cDNA, RIKEN full-length enriched library, clone:F930031K18 product:hypothetical protein, full insert sequence. [AK158109]	NM_001033144	3.9098	5.64e-13
Rras2	Mus musculus related RAS viral (r-ras) oncogene homolog 2 (Rras2), mRNA [NM_025846]	NM_025846	3.90924	6.14e-13
Gpd1	Mus musculus glycerol-3-phosphate dehydrogenase 1 (soluble) (Gpd1), mRNA [NM_010271]	NM_010271	3.90841	5.65e-13
Zfp518	Mus musculus zinc finger protein 518 (Zfp518), mRNA [NM_028319]	XM_894273	3.90429	8.06e-12
Mboat2	Mus musculus membrane bound O-acyltransferase domain containing 2 (Mboat2), transcript variant 1, mRNA [NM_026037]	NM_026037	3.90404	6.01e-13
Mtm1	Mus musculus X-linked myotubular myopathy gene 1 (Mtm1), mRNA [NM_019926]	NM_019926	3.90358	8.9e-07
Fam120b	Mus musculus family with sequence similarity 120, member B (Fam120b), mRNA [NM_024203]	NM_024203	3.90263	2.29e-08
Cartpt	Mus musculus CART prepropeptide (Cartpt), transcript variant 1, mRNA [NM_013732]	NM_013732	3.899	5.86e-11
Pvr	Mus musculus poliovirus receptor (Pvr), mRNA [NM_027514]	NM_027514	3.89841	2.08e-08
Pot1b	Mus musculus protection of telomeres 1B (Pot1b), mRNA [NM_028370]	NM_028370	3.89736	7e-05
Nipa2	Mus musculus non imprinted in Prader-Willi/Angelman syndrome 2 homolog (human), mRNA (cDNA clone IMAGE:4984162), complete cds. [BC031109]	BC031109	3.89614	4e-05
Ypel2	Mus musculus 10 days neonate olfactory brain cDNA, RIKEN full-length enriched library, clone:E530004K11 product:hypothetical protein, full insert sequence. [AK089126]	AK089126	3.89061	6.5e-08
Mgat5	Mus musculus adult male testis cDNA, RIKEN full-length enriched library, clone:4930471A21 product:unclassifiable, full insert sequence [AK015544]	XM_912670	3.89058	9.61e-13
AK032904	Mus musculus 12 days embryo male wolffian duct includes surrounding region cDNA, RIKEN full-length enriched library, clone:6720470G16 product:unclassifiable, full insert sequence. [AK032904]	AK032904	3.89056	0.00123
Wrb	Mus musculus adult male corpus striatum cDNA, RIKEN full-length enriched library, clone:C030018G21 product:Tryptophan rich basic protein homolog [Mus musculus], full insert sequence. [AK021091]	AK021091	3.89028	0.00192
Ank2	Mus musculus ankyrin 2, brain (Ank2), transcript variant 2, mRNA [NM_178655]	NM_178655	3.88731	2.01e-11
Prr15	Mus musculus proline rich 15 (Prr15), mRNA [NM_030024]	NM_030024	3.88573	6.42e-13
NAP061378-1	Unknown	XM_001006035	3.88484	1.17e-10
Tom1l2	Mus musculus target of myb1-like 2 (chicken) (Tom1l2), transcript variant 2, mRNA [NM_001039092]	NM_153080	3.88075	6.58e-13
Wfikkn1	Mus musculus WAP, FS, Ig, KU, and NTR-containing protein 1 (Wfikkn1), mRNA [NM_001100454]	BC026460	3.87795	3.36e-09
Plxnc1	Mus musculus plexin C1 (Plxnc1), mRNA [NM_018797]	NM_018797	3.87736	8.2e-12
Pramel	PREDICTED: Mus musculus predicted gene, EG621322 (EG621322), mRNA [XM_885719]	XM_885719	3.87703	9e-05
Ptprd	Mus musculus protein tyrosine phosphatase, receptor type, D (Ptprd), transcript variant b, mRNA [NM_011211]	NM_001014288	3.87566	8.02e-13
Atp1a1	Mus musculus ATPase, Na+/K+ transporting, alpha 1 polypeptide (Atp1a1), mRNA [NM_144900]	NM_144900	3.87518	6.77e-13
Glb1l3	Mus musculus galactosidase, beta 1 like 3 (Glb1l3), mRNA [NM_001113323]	AK014852	3.87443	7.02e-13
Bag2	Mus musculus BCL2-associated athanogene 2 (Bag2), mRNA [NM_145392]	NM_145392	3.87252	7.47e-13
Rab11fip3	Mus musculus mRNA for mKIAA0665 protein. [AB093257]	BC037132	3.87152	6.92e-13
Tmem52	Mus musculus adult male tongue cDNA, RIKEN full-length enriched library, clone:2310043I08 product:hypothetical protein, full insert sequence. [AK009779]	AK009779	3.86735	9.7e-13
Slain1	Mus musculus SLAIN motif family, member 1 (Slain1), mRNA [NM_198014]	NM_198014	3.86551	1.07e-12
Pde4d	Mus musculus phosphodiesterase 4D, cAMP specific (Pde4d), mRNA [NM_011056]	NM_011056	3.86387	1.05e-10
Bcl2l2	Mus musculus BCL2-like 2 (Bcl2l2), mRNA [NM_007537]	NM_007537	3.86253	7.81e-13
A230067G21Rik	Mus musculus 15 days embryo head cDNA, RIKEN full-length enriched library, clone:D930015M12 product:unclassifiable, full insert sequence. [AK086241]	AK086241	3.86194	1.05e-12
B4galt3	Mus musculus UDP-Gal:betaGlcNAc beta 1,4-galactosyltransferase, polypeptide 3, mRNA (cDNA clone IMAGE:3978260), **** WARNING: chimeric clone ****. [BC021830]	BC021830	3.86123	0.0013
A_51_P346472	Unknown		3.86012	1.07e-12
Slc45a4	Mus musculus mRNA for mKIAA1126 protein [AK173104]	AK173104	3.85605	6.93e-11
F730043M19Rik	Mus musculus adult male spinal cord cDNA, RIKEN full-length enriched library, clone:A330050P04 product:hypothetical protein, full insert sequence [AK162927]	AK089514	3.85596	7.96e-11
Zfp449	Mus musculus zinc finger protein 449 (Zfp449), mRNA [NM_030139]	NM_030139	3.85295	4e-05
C330006P03Rik	Mus musculus ES cells cDNA, RIKEN full-length enriched library, clone:C330006P03 product:unclassifiable, full insert sequence [AK049142]	AK049142	3.85053	5.96e-11
Plp1	Mus musculus proteolipid protein (myelin) 1 (Plp1), mRNA [NM_011123]	NM_011123	3.84573	1.11e-32
Cltb	Mus musculus clathrin, light polypeptide (Lcb) (Cltb), mRNA [NM_028870]	NM_028870	3.84514	9.03e-13
AK037375	Mus musculus 16 days neonate thymus cDNA, RIKEN full-length enriched library, clone:A130012I18 product:unclassifiable, full insert sequence. [AK037375]	AK037375	3.8449	9.69e-11
Lonrf3	Mus musculus 8 days embryo whole body cDNA, RIKEN full-length enriched library, clone:5730439E01 product:hypothetical Phenylalanine-rich region containing protein, full insert sequence. [AK077530]	AK077530	3.84303	1.21e-12
Map3k7ip3	Mus musculus mitogen-activated protein kinase kinase kinase 7 interacting protein 3 (Map3k7ip3), mRNA [NM_025729]	NM_025729	3.84288	8.42e-13
Ttll12	Mus musculus tubulin tyrosine ligase-like family, member 12 (Ttll12), mRNA [NM_183017]	NM_183017	3.83926	8.42e-13
Fxyd6	Mus musculus FXYD domain-containing ion transport regulator 6 (Fxyd6), mRNA [NM_022004]	NM_022004	3.83922	8.97e-13
3100003M19Rik	Mus musculus 13 days embryo head cDNA, RIKEN full-length enriched library, clone:3100003M19 product:hypothetical protein, full insert sequence. [AK013928]	AK013928	3.83876	1.65e-08
Samd5	Mus musculus sterile alpha motif domain containing 5 (Samd5), mRNA [NM_177271]	NM_177271	3.83739	1.09e-09
BF535186	602054250F1 NCI_CGAP_SG2 Mus musculus cDNA clone IMAGE:4193245 5'. [BF535186]	BF535186	3.837	2.43e-11
Mboat2	Mus musculus membrane bound O-acyltransferase domain containing 2 (Mboat2), transcript variant 1, mRNA [NM_026037]	NM_026037	3.83369	8.73e-13
Zfp518b	Mus musculus zinc finger protein 518B (Zfp518b), mRNA [NM_001081144]	XM_899439	3.83107	4.19e-12
Sfrs17b	Mus musculus splicing factor, arginine/serine-rich 17b (Sfrs17b), mRNA [NM_001081956]	XM_111900	3.82826	1.1e-12
6330509M23Rik	Mus musculus adult male medulla oblongata cDNA, RIKEN full-length enriched library, clone:6330509M23 product:unclassifiable, full insert sequence [AK018210]	AK018210	3.82796	0.00208
Slain1	Mus musculus SLAIN motif family, member 1 (Slain1), mRNA [NM_198014]	NM_198014	3.82712	1.07e-12
Ric3	Mus musculus resistance to inhibitors of cholinesterase 3 homolog (C. elegans) (Ric3), transcript variant 1, mRNA [NM_001038624]	NM_001038624	3.82508	1.27e-11
AK049532	Mus musculus 7 days embryo whole body cDNA, RIKEN full-length enriched library, clone:C430020A21 product:unclassifiable, full insert sequence. [AK049532]	AK049532	3.82304	0.00529
Sox9	Mus musculus SRY-box containing gene 9 (Sox9), mRNA [NM_011448]	NM_011448	3.82251	1.12e-08
Mfn1	Mus musculus mRNA for mKIAA4032 protein [AK220169]	AK220169	3.82233	1.28e-08
TC1692139	Unknown		3.82046	2.61e-09
Phf16	Mus musculus PHD finger protein 16 (Phf16), mRNA [NM_199317]	NM_199317	3.81902	1.98e-11
BB551773	BB551773 RIKEN full-length enriched, 2 days pregnant adult female oviduct Mus musculus cDNA clone E230030F22 3'. [BB551773]	BB551773	3.81898	2.18e-12
AK032760	Mus musculus 12 days embryo male wolffian duct includes surrounding region cDNA, RIKEN full-length enriched library, clone:6720430F13 product:unclassifiable, full insert sequence [AK032760]	AK032760	3.81861	0.00316
Slc30a4	Mus musculus solute carrier family 30 (zinc transporter), member 4 (Slc30a4), mRNA [NM_011774]	NM_011774	3.81583	1.2e-12
Garnl3	Mus musculus 12 days embryo spinal ganglion cDNA, RIKEN full-length enriched library, clone:D130006M04 product:unclassifiable, full insert sequence. [AK083773]	AK083773	3.81409	0.00896
Copb2	Mus musculus 15 days embryo male testis cDNA, RIKEN full-length enriched library, clone:8030475H09 product:coatomer protein complex, subunit beta 2 (beta prime), full insert sequence. [AK033250]	AK033250	3.81157	9e-05
Myst4	Mus musculus mRNA for mKIAA0383 protein. [AK129129]	AK129129	3.80984	0.00185
Apobec3	Mus musculus adult male hippocampus cDNA, RIKEN full-length enriched library, clone:C630044A22 product:hypothetical protein, MGC:7002, full insert sequence. [AK049998]	AK049998	3.80906	1.24e-12
Diap2	Mus musculus diaphanous homolog 2 (Drosophila) (Diap2), transcript variant 1, mRNA [NM_017398]	NM_017398	3.80743	1.11e-12
Oit3	Mus musculus oncoprotein induced transcript 3 (Oit3), mRNA [NM_010959]	NM_010959	3.8059	2.17e-10
Trim26	Mus musculus tripartite motif-containing 26 (Trim26), transcript variant 1, mRNA [NM_001025599]	NM_030698	3.80577	1.56e-09
Foxn3	Mus musculus forkhead box N3, mRNA (cDNA clone IMAGE:3489687). [BC029185]	BC029185	3.80403	1.21e-12
Mcf2	Mus musculus mcf.2 transforming sequence (Mcf2), mRNA [NM_133197]	NM_133197	3.80394	3e-08
Ptprv	Mus musculus protein tyrosine phosphatase, receptor type, V (Ptprv), mRNA [NM_007955]	NM_007955	3.80315	5.41e-10
Lpin2	Mus musculus adult male diencephalon cDNA, RIKEN full-length enriched library, clone:9330128J06 product:lipin 2, full insert sequence [AK033959]	AK033959	3.80276	5.47e-10
Creb3	Mus musculus cAMP responsive element binding protein 3 (Creb3), mRNA [NM_013497]	AK144208	3.8027	1.02e-12
Slc31a1	Mus musculus solute carrier family 31, member 1 (Slc31a1), mRNA [NM_175090]	NM_175090	3.80141	1.92e-12
Slc16a3	Mus musculus solute carrier family 16 (monocarboxylic acid transporters), member 3 (Slc16a3), mRNA [NM_030696]	NM_030696	3.798	1.06e-12
Zfp386	Mus musculus mRNA for mKIAA4205 protein [AK220544]	AK220544	3.79456	5.88e-10
Shc4	Mus musculus SHC (Src homology 2 domain containing) family, member 4 (Shc4), mRNA [NM_199022]	NM_199022	3.79394	2.43e-08
Armcx5	Mus musculus armadillo repeat containing, X-linked 5 (Armcx5), mRNA [NM_001009575]	NM_001009575	3.79291	1.2e-12
Smarcd1	Mus musculus SWI/SNF related, matrix associated, actin dependent regulator of chromatin, subfamily d, member 1 (Smarcd1), mRNA [NM_031842]	NM_031842	3.79264	1.05e-10
Cbln2	Mus musculus cerebellin 2 precursor protein (Cbln2), mRNA [NM_172633]	NM_172633	3.79164	3.43e-08
Ctnna2	Mus musculus catenin (cadherin associated protein), alpha 2 (Ctnna2), transcript variant 2, mRNA [NM_009819]	NM_009819	3.79095	1.11e-12
Cpne8	Mus musculus copine VIII (Cpne8), transcript variant 1, mRNA [NM_025815]	NM_025815	3.78882	1.45e-12
Magea8	Mus musculus melanoma antigen, family A, 8 (Magea8), mRNA [NM_020020]	NM_020020	3.78428	2.78e-12
Fastkd1	Mus musculus FAST kinase domains 1 (Fastkd1), mRNA [NM_177244]	NM_177244	3.78399	1.93e-12
Palb2	Mus musculus partner and localizer of BRCA2 (Palb2), mRNA [NM_001081238]	BC066140	3.78295	8.53e-06
Tsr2	Mus musculus TSR2, 20S rRNA accumulation, homolog (S. cerevisiae) (Tsr2), mRNA [NM_175146]	NM_175146	3.78256	2.94e-11
Slc22a4	Mus musculus solute carrier family 22 (organic cation transporter), member 4 (Slc22a4), mRNA [NM_019687]	NM_019687	3.78243	6.7e-09
Scamp1	Mus musculus secretory carrier membrane protein 1 (Scamp1), mRNA [NM_029153]	NM_029153	3.78228	1.15e-12
AK082394	Mus musculus 0 day neonate cerebellum cDNA, RIKEN full-length enriched library, clone:C230046B06 product:unclassifiable, full insert sequence. [AK082394]	AK082394	3.78198	9e-05
Tmem186	Mus musculus 12 days embryo head cDNA, RIKEN full-length enriched library, clone:3000002F03 product:unclassifiable, full insert sequence [AK013859]	AK013859	3.77974	0.0053
Syne2	Mus musculus synaptic nuclear envelope 2 (Syne2), mRNA [NM_001005510]	BC082586	3.77864	1.89e-12
AK140790	Mus musculus 16 days embryo head cDNA, RIKEN full-length enriched library, clone:C130019G10 product:hypothetical protein, full insert sequence. [AK140790]	AK140790	3.77724	1.63e-06
Taf3	Mus musculus adult male thymus cDNA, RIKEN full-length enriched library, clone:5830438I15 product:TAFII140 PROTEIN (FRAGMENT) homolog [Mus musculus], full insert sequence [AK030878]	AK030878	3.7727	9e-05
Leng9	Mus musculus 17 days pregnant adult female amnion cDNA, RIKEN full-length enriched library, clone:I920088G24 product:Hypothetical zinc finger C-x8-C-x5-C-x3-H type containing protein, full insert sequence [AK147019]	AK147019	3.7717	1.87e-12
AK077575	Mus musculus 8 days embryo whole body cDNA, RIKEN full-length enriched library, clone:5730453K06 product:unclassifiable, full insert sequence. [AK077575]	AK077575	3.76688	0.00186
Pkd2	Mus musculus polycystic kidney disease 2 (Pkd2), mRNA [NM_008861]	NM_008861	3.76658	1.29e-12
4921505C17Rik	Mus musculus RIKEN cDNA 4921505C17 gene (4921505C17Rik), mRNA [NM_030168]	NM_030168	3.76615	1.59e-12
Kank1	Mus musculus KN motif and ankyrin repeat domains 1 (Kank1), mRNA [NM_181404]	NM_181404	3.76538	1.28e-12
Dedd2	Mus musculus 10 days neonate cortex cDNA, RIKEN full-length enriched library, clone:A830049M19 product:similar to death effector domain-containing and DNA-binding protein 2, full insert sequence [AK043908]	AK043908	3.76392	0.00012
Lass5	Mus musculus LAG1 homolog, ceramide synthase 5 (Lass5), mRNA [NM_028015]	NM_028015	3.76202	1.3e-12
LOC100045753	PREDICTED: Mus musculus similar to headcase homolog (LOC100045753), mRNA [XM_001474871]	XM_987501	3.76059	1.36e-07
AK082362	Mus musculus 0 day neonate cerebellum cDNA, RIKEN full-length enriched library, clone:C230040I21 product:unclassifiable, full insert sequence. [AK082362]	AK082362	3.76032	1.16e-11
Unc13b	Mus musculus unc-13 homolog B (C. elegans) (Unc13b), mRNA [NM_001081413]	AK122422	3.75437	1.35e-12
100041659	Mus musculus 10 days neonate cortex cDNA, RIKEN full-length enriched library, clone:A830089E20 product:unclassifiable, full insert sequence [AK044091]	AK044091	3.7522	6e-05
Cdk2	Mus musculus cyclin-dependent kinase 2 (Cdk2), transcript variant 2, mRNA [NM_016756]	NM_016756	3.75147	3.4e-11
Crkrs	Mus musculus CDC2-related kinase, arginine/serine-rich (Crkrs), transcript variant 1, mRNA [NM_001109626]	AK137262	3.75043	2.08e-11
8030462N17Rik	Mus musculus 16 days embryo head cDNA, RIKEN full-length enriched library, clone:C130075L17 product:hypothetical protein, full insert sequence. [AK163840]	AK163840	3.74409	1.69e-08
Ank3	Mus musculus ankyrin 3, epithelial (Ank3), transcript variant 2, mRNA [NM_146005]	NM_170730	3.74367	5.2e-08
Myo6	Mus musculus myosin VI (Myo6), mRNA [NM_001039546]	NM_001039546	3.74321	1.45e-12
Mocos	Mus musculus molybdenum cofactor sulfurase (Mocos), mRNA [NM_026779]	XM_484710	3.74141	0.00031
Phf16	Mus musculus mRNA for mKIAA0215 protein. [AK129091]	AK129091	3.74119	2.71e-12
Cidea	Mus musculus cell death-inducing DNA fragmentation factor, alpha subunit-like effector A (Cidea), mRNA [NM_007702]	NM_007702	3.73962	1.48e-12
Prph2	Mus musculus peripherin 2 (Prph2), mRNA [NM_008938]	NM_008938	3.73735	4.59e-12
Pdk1	Mus musculus pyruvate dehydrogenase kinase, isoenzyme 1 (Pdk1), nuclear gene encoding mitochondrial protein, mRNA [NM_172665]	NM_172665	3.7346	1.66e-12
8030411F24Rik	Mus musculus RIKEN cDNA 8030411F24 gene (8030411F24Rik), mRNA [NM_030135]	NM_030135	3.7341	1.55e-12
Kdsr	Mus musculus 3-ketodihydrosphingosine reductase (Kdsr), mRNA [NM_027534]	AK035049	3.73208	2.23e-09
Irgq	Mus musculus immunity-related GTPase family, Q (Irgq), mRNA [NM_153134]	NM_153134	3.72699	7.28e-06
A_52_P949155	Unknown		3.72692	4e-05
Trim32	Mus musculus tripartite motif-containing 32 (Trim32), mRNA [NM_053084]	NM_053084	3.72628	1.66e-12
A830023I12Rik	Mus musculus RIKEN cDNA A830023I12 gene, mRNA (cDNA clone MGC:7438 IMAGE:3489445), complete cds. [BC007165]	BC007165	3.72577	2.31e-06
2010305A19Rik	Mus musculus RIKEN cDNA 2010305A19 gene (2010305A19Rik), mRNA [NM_027250]	NM_027250	3.72571	2.77e-10
A230092J17Rik	Mus musculus adult male hypothalamus cDNA, RIKEN full-length enriched library, clone:A230092P19 product:unclassifiable, full insert sequence [AK039075]	AK039069	3.72272	2.13e-06
Diap2	Mus musculus diaphanous homolog 2 (Drosophila) (Diap2), transcript variant 2, mRNA [NM_172493]	AK083254	3.72061	1.66e-12
AK039920	Mus musculus 0 day neonate thymus cDNA, RIKEN full-length enriched library, clone:A430030L24 product:unclassifiable, full insert sequence [AK039920]	AK039920	3.71924	6.52e-07
AK135586	Mus musculus 1 day pregnant adult female ovary cDNA, RIKEN full-length enriched library, clone:7230401B09 product:hypothetical protein, full insert sequence. [AK135586]	AK135586	3.71882	3.54e-12
Mfsd7c	Mus musculus major facilitator superfamily domain containing 7C (Mfsd7c), mRNA [NM_145447]	NM_145447	3.71551	1.71e-12
Acat3	Mus musculus acetyl-Coenzyme A acetyltransferase 3 (Acat3), mRNA [NM_153151]	NM_153151	3.71279	8.5e-12
Uba6	Mus musculus ubiquitin-like modifier activating enzyme 6 (Uba6), mRNA [NM_172712]	NM_172712	3.70558	3.44e-12
AK086082	Mus musculus 15 days embryo head cDNA, RIKEN full-length enriched library, clone:D930003F11 product:unclassifiable, full insert sequence [AK086082]	AK086082	3.70003	3.59e-06
AU021838	Mus musculus 12 days embryo male wolffian duct includes surrounding region cDNA, RIKEN full-length enriched library, clone:6720461H18 product:unclassifiable, full insert sequence [AK032842]	AK032842	3.69998	3.94e-12
Ppp1r16b	nddEcoRI_4 Hematopoietic stem cells Mus musculus cDNA, mRNA sequence [DT931682]	AK087199	3.69801	3.13e-12
5430433E21Rik	Mus musculus RIKEN cDNA 5430433E21 gene (5430433E21Rik), mRNA [NM_028974]	AK048611	3.69569	0.00381
Cited4	Mus musculus Cbp/p300-interacting transactivator, with Glu/Asp-rich carboxy-terminal domain, 4 (Cited4), mRNA [NM_019563]	NM_019563	3.69566	1.96e-12
Atp1a1	Mus musculus ATPase, Na+/K+ transporting, alpha 1 polypeptide (Atp1a1), mRNA [NM_144900]	NM_144900	3.69263	1.94e-12
AK051921	Mus musculus 12 days embryo eyeball cDNA, RIKEN full-length enriched library, clone:D230019G01 product:hypothetical protein, full insert sequence. [AK051921]	AK051921	3.6891	0.00698
Klhdc5	Mus musculus kelch domain containing 5 (Klhdc5), mRNA [NM_001081237]	AK052765	3.68806	0.0002
Mapkapk3	Mus musculus mitogen-activated protein kinase-activated protein kinase 3 (Mapkapk3), mRNA [NM_178907]	NM_178907	3.6876	2.37e-12
Actn2	Mus musculus actinin alpha 2 (Actn2), mRNA [NM_033268]	NM_033268	3.68661	4.48e-12
Ssbp1	Mus musculus single-stranded DNA binding protein 1 (Ssbp1), transcript variant 1, mRNA [NM_212468]	NM_212468	3.68489	4e-05
A230070E04Rik	Mus musculus 0 day neonate cerebellum cDNA, RIKEN full-length enriched library, clone:C230086E23 product:hypothetical Leucine-rich region containing protein, full insert sequence. [AK048964]	AK048964	3.68452	2e-05
Phip	Mus musculus pleckstrin homology domain interacting protein (Phip), mRNA [NM_001081216]	XM_358384	3.68352	1.37e-11
Cdc42se1	Mus musculus CDC42 small effector 1 (Cdc42se1), transcript variant 1, mRNA [NM_172395]	NM_172395	3.68279	2.15e-12
Pcyt1b	Mus musculus phosphate cytidylyltransferase 1, choline, beta isoform (Pcyt1b), transcript variant 1, mRNA [NM_211138]	NM_211138	3.68252	2.96e-07
Rnf4	Mus musculus 16 days neonate thymus cDNA, RIKEN full-length enriched library, clone:A130020G03 product:ring finger protein 4, full insert sequence [AK037465]	AK037465	3.68247	6.46e-07
Ddah1	Mus musculus dimethylarginine dimethylaminohydrolase 1 (Ddah1), mRNA [NM_026993]	BC060266	3.68163	2.44e-12
2900024O10Rik	Mus musculus RIKEN cDNA 2900024O10 gene (2900024O10Rik), mRNA [NM_028372]	NM_028372	3.68098	3.09e-12
Rnf128	Mus musculus ring finger protein 128 (Rnf128), mRNA [NM_023270]	NM_023270	3.68089	3.03e-12
Rbm8a	Mus musculus RNA binding motif protein 8a (Rbm8a), transcript variant 2, mRNA [NM_025875]	NM_025875	3.68051	1.41e-06
Apoo	Mus musculus 0 day neonate head cDNA, RIKEN full-length enriched library, clone:4831430B14 product:unclassifiable, full insert sequence [AK029224]	AK029224	3.67952	0.00131
Txk	Mus musculus TXK tyrosine kinase (Txk), transcript variant 2, mRNA [NM_013698]	NM_013698	3.6775	5.31e-12
2900024O10Rik	Mus musculus RIKEN cDNA 2900024O10 gene (2900024O10Rik), mRNA [NM_028372]	NM_028372	3.67644	2.38e-12
Odz4	Mus musculus odd Oz/ten-m homolog 4 (Drosophila) (Odz4), mRNA [NM_011858]	NM_011858	3.6756	2.33e-12
Chd6	Mus musculus chromodomain helicase DNA binding protein 6 (Chd6), mRNA [NM_173368]	NM_173368	3.67469	1.6e-11
Cstf2	Mus musculus cleavage stimulation factor, 3' pre-RNA subunit 2 (Cstf2), mRNA [NM_133196]	NM_133196	3.67147	2.33e-09
Fadd	Mus musculus Fas (TNFRSF6)-associated via death domain (Fadd), mRNA [NM_010175]	NM_010175	3.66881	5.4e-12
Hdc	Mus musculus histidine decarboxylase (Hdc), mRNA [NM_008230]	NM_008230	3.66763	2.27e-12
Ddit4l	Mus musculus DNA-damage-inducible transcript 4-like (Ddit4l), mRNA [NM_030143]	NM_030143	3.6663	4.76e-12
B3galt1	Mus musculus UDP-Gal:betaGlcNAc beta 1,3-galactosyltransferase, polypeptide 1 (B3galt1), mRNA [NM_020283]	NM_020283	3.66587	7.28e-09
Hmgb3	Mus musculus high mobility group box 3 (Hmgb3), mRNA [NM_008253]	NM_008253	3.66469	2.31e-12
Phgdh	Mus musculus 3-phosphoglycerate dehydrogenase (Phgdh), mRNA [NM_016966]	NM_016966	3.66417	2.31e-12
Ryk	Mus musculus receptor-like tyrosine kinase (Ryk), transcript variant 1, mRNA [NM_013649]	BC032275	3.66286	4.34e-12
Pcgf3	Mus musculus adult male tongue cDNA, RIKEN full-length enriched library, clone:2310035N15 product:unclassifiable, full insert sequence. [AK009638]	AK009638	3.65919	5.58e-12
Terf2ip	Mus musculus telomeric repeat binding factor 2, interacting protein (Terf2ip), mRNA [NM_020584]	NM_020584	3.65904	3.26e-11
EG434179	Mus musculus predicted gene, EG434179 (EG434179), mRNA [NM_001008427]	NM_001008427	3.65644	2.56e-12
Klhl23	Mus musculus kelch-like 23 (Drosophila) (Klhl23), mRNA [NM_177784]	NM_177784	3.65564	2.57e-12
Rhbdl3	Mus musculus rhomboid, veinlet-like 3 (Drosophila) (Rhbdl3), mRNA [NM_139228]	NM_139228	3.65488	5.7e-10
Plxna1	Mus musculus mRNA for mKIAA4053 protein [AK220460]	AK220460	3.65369	2.55e-12
NAP070564-1	Unknown		3.65216	8.26e-10
Aph1a	Mus musculus anterior pharynx defective 1a homolog (C. elegans) (Aph1a), transcript variant 1, mRNA [NM_146104]	NM_146104	3.64996	4.69e-10
Nrxn1	Mus musculus neurexin I (Nrxn1), mRNA [NM_020252]	AB093249	3.64643	7.13e-08
Nol6	Mus musculus nucleolar protein family 6 (RNA-associated) (Nol6), mRNA [NM_139236]	NM_139236	3.64438	2.24e-10
1500009L16Rik	Mus musculus 11 days embryo whole body cDNA, RIKEN full-length enriched library, clone:2700050C19 product:unclassifiable, full insert sequence. [AK012407]	AK012407	3.64381	2.7e-12
Sesn2	Mus musculus NOD-derived CD11c +ve dendritic cells cDNA, RIKEN full-length enriched library, clone:F630107J04 product:sestrin 2, full insert sequence. [AK170547]	AK170547	3.64347	2.63e-12
AK034886	Mus musculus 12 days embryo embryonic body between diaphragm region and neck cDNA, RIKEN full-length enriched library, clone:9430057C17 product:unclassifiable, full insert sequence [AK034886]	AK034886	3.6418	0.00518
Clca3	Mus musculus chloride channel calcium activated 3 (Clca3), mRNA [NM_017474]	NM_017474	3.63992	3.27e-10
Abcd3	Mus musculus ATP-binding cassette, sub-family D (ALD), member 3 (Abcd3), mRNA [NM_008991]	NM_008991	3.63905	2.71e-12
Zfp7	Mus musculus zinc finger protein 7 (Zfp7), mRNA [NM_145916]	NM_145916	3.636	2.98e-12
Klhl5	Mus musculus kelch-like 5 (Drosophila) (Klhl5), mRNA [NM_175174]	BC057606	3.63598	3.48e-12
Ankrd34b	Mus musculus ankyrin repeat domain 34B (Ankrd34b), mRNA [NM_175455]	BC096609	3.63197	8.95e-06
ENSMUST00000058119	Signal peptidase complex subunit 3 (EC 3.4.-.-)(Microsomal signal peptidase 23 kDa subunit)(SPase 22 kDa subunit)(SPC22/23) [Source:UniProtKB/Swiss-Prot;Acc:Q9D365] [ENSMUST00000058119]	NM_029823	3.62784	3.51e-12
Vasn	Mus musculus vasorin (Vasn), mRNA [NM_139307]	NM_139307	3.62765	2.91e-12
Chrna4	Mus musculus cholinergic receptor, nicotinic, alpha polypeptide 4 (Chrna4), mRNA [NM_015730]	NM_015730	3.62589	6.82e-12
4930550L24Rik	Mus musculus RIKEN cDNA 4930550L24 gene (4930550L24Rik), mRNA [NM_023774]	BC087920	3.62453	3.08e-12
Cnnm3	Mus musculus cyclin M3 (Cnnm3), transcript variant 2, mRNA [NM_001039551]	NM_001039551	3.62346	0.00012
Ikbkg	Mus musculus inhibitor of kappaB kinase gamma (Ikbkg), transcript variant 1, mRNA [NM_010547]	NM_010547	3.61343	9e-05
Pja1	Mus musculus praja1, RING-H2 motif containing (Pja1), transcript variant 2, mRNA [NM_008853]	NM_008853	3.6105	3.22e-12
Thumpd1	Mus musculus 12 days embryo spinal ganglion cDNA, RIKEN full-length enriched library, clone:D130093K19 product:hypothetical protein, full insert sequence. [AK084107]	XM_989710	3.60867	1.26e-11
Syt7	Mus musculus synaptotagmin VII (Syt7), transcript variant 3, mRNA [NM_173068]	AK028004	3.60859	3.33e-12
Etl4	Mus musculus enhancer trap locus 4 (Etl4), mRNA [NM_001081006]	AB125594	3.60748	3.53e-12
AK199677	Mus musculus cDNA, clone:Y1G0132A19, strand:unspecified. [AK199677]	AK199677	3.60582	3.34e-12
Cbln2	Mus musculus cerebellin 2 precursor protein (Cbln2), mRNA [NM_172633]	NM_172633	3.60452	1.24e-08
Tex19.2	Mus musculus testis expressed gene 19.2 (Tex19.2), mRNA [NM_027622]	NM_027622	3.60439	3.34e-12
TC1641968	Q6PED0_RAT (Q6PED0) Ribosomal protein S27a, partial (60%) [TC1641968]		3.60434	6.81e-12
D930046H04Rik	Mus musculus 15 days embryo head cDNA, RIKEN full-length enriched library, clone:D930046H04 product:hypothetical protein, full insert sequence. [AK086701]	AK048487	3.60383	1.21e-07
Tiam1	Mus musculus T-cell lymphoma invasion and metastasis 1 (Tiam1), mRNA [NM_009384]	NM_009384	3.60368	3.45e-12
Fbxo27	Mus musculus F-box protein 27 (Fbxo27), mRNA [NM_207238]	NM_207238	3.60255	4.07e-12
Mrm1	Mus musculus adult male aorta and vein cDNA, RIKEN full-length enriched library, clone:A530065E19 product:hypothetical protein, full insert sequence. [AK041034]	AK041034	3.60071	2e-05
Nudt10	Mus musculus nudix (nucleoside diphosphate linked moiety X)-type motif 10 (Nudt10), mRNA [NM_001031664]	NM_001031664	3.59915	0.00284
Sox11	Mus musculus SRY-box containing gene 11 (Sox11), mRNA [NM_009234]	NM_009234	3.59722	0.00099
AK035139	Mus musculus 12 days embryo embryonic body between diaphragm region and neck cDNA, RIKEN full-length enriched library, clone:9430092O13 product:unclassifiable, full insert sequence. [AK035139]	AK035139	3.5962	1.41e-10
AK041018	Mus musculus adult male aorta and vein cDNA, RIKEN full-length enriched library, clone:A530061N18 product:unclassifiable, full insert sequence. [AK041018]	AK041018	3.59594	0.00091
Lba1	Mus musculus 0 day neonate cerebellum cDNA, RIKEN full-length enriched library, clone:C230073N20 product:unclassifiable, full insert sequence. [AK048832]	XM_983780	3.59488	1.11e-08
Tcra	Mus musculus SJL-7A5 T cell receptor alpha chain mRNA, complete cds. [U07662]	U07662	3.59391	1.61e-09
Dmbx1	Mus musculus diencephalon/mesencephalon homeobox 1 (Dmbx1), transcript variant 1, mRNA [NM_130865]	NM_130865	3.59185	1.87e-06
Extl1	Mus musculus exostoses (multiple)-like 1 (Extl1), mRNA [NM_019578]	NM_019578	3.59176	0.00418
Myo1d	Mus musculus adult female vagina cDNA, RIKEN full-length enriched library, clone:9930104H07 product:MYOSIN-1D, full insert sequence. [AK037051]	AK037051	3.58717	0.00043
Rab4a	Mus musculus mRNA for rab 4, complete cds. [D86563]	NM_009003	3.58703	4.16e-12
Fam181b	Mus musculus family with sequence similarity 181, member B (Fam181b), mRNA [NM_021427]	NM_021427	3.58494	4.1e-12
Tnfrsf12a	Mus musculus tumor necrosis factor receptor superfamily, member 12a (Tnfrsf12a), mRNA [NM_013749]	NM_013749	3.58269	4.08e-12
Klhl15	Mus musculus adult male pituitary gland cDNA, RIKEN full-length enriched library, clone:5330411I24 product:unclassifiable, full insert sequence. [AK030432]	AK030432	3.58055	5.8e-12
AK037434	Mus musculus 16 days neonate thymus cDNA, RIKEN full-length enriched library, clone:A130018N09 product:unclassifiable, full insert sequence. [AK037434]	AK037434	3.57915	4.48e-12
AK085781	Mus musculus 16 days neonate heart cDNA, RIKEN full-length enriched library, clone:D830007O09 product:unclassifiable, full insert sequence [AK085781]	AK085781	3.57862	1e-05
AK042238	Mus musculus 3 days neonate thymus cDNA, RIKEN full-length enriched library, clone:A630074B15 product:nuclear receptor coactivator 6 interacting protein, full insert sequence. [AK042238]	AK042238	3.57677	2.97e-11
Aldh6a1	Mus musculus aldehyde dehydrogenase family 6, subfamily A1 (Aldh6a1), nuclear gene encoding mitochondrial protein, mRNA [NM_134042]	NM_134042	3.57677	4.02e-12
Asah2	Mus musculus N-acylsphingosine amidohydrolase 2 (Asah2), mRNA [NM_018830]	NM_018830	3.57556	2.77e-07
Elovl3	Mus musculus elongation of very long chain fatty acids (FEN1/Elo2, SUR4/Elo3, yeast)-like 3 (Elovl3), mRNA [NM_007703]	NM_007703	3.57196	0.00017
A230054D04Rik	Mus musculus RIKEN cDNA A230054D04 gene (A230054D04Rik), mRNA [NM_001081422]	XM_987722	3.57183	1.42e-11
Enpp5	Mus musculus ectonucleotide pyrophosphatase/phosphodiesterase 5 (Enpp5), mRNA [NM_032003]	NM_032003	3.57165	7.82e-12
Nxnl2	Mus musculus nucleoredoxin-like 2, mRNA (cDNA clone IMAGE:4507156), with apparent retained intron. [BC016199]	BC016199	3.57071	3e-05
2010107C10Rik	Mus musculus adult male small intestine cDNA, RIKEN full-length enriched library, clone:2010107C10 product:unclassifiable, full insert sequence. [AK008330]	AK008330	3.56942	9.21e-10
AK086502	Mus musculus 15 days embryo head cDNA, RIKEN full-length enriched library, clone:D930033A15 product:unclassifiable, full insert sequence. [AK086502]	AK086502	3.56882	7.08e-12
Pcmtd1	Mus musculus protein-L-isoaspartate (D-aspartate) O-methyltransferase domain containing 1 (Pcmtd1), mRNA [NM_183028]	NM_183028	3.56796	4.22e-12
Fyn	Mus musculus Fyn(T) (L-fyn(T)) mRNA, complete cds. [U70324]	NM_008054	3.56669	2.6e-29
AK160276	Mus musculus 6 days neonate head cDNA, RIKEN full-length enriched library, clone:5430427F17 product:unclassifiable, full insert sequence [AK160276]	AK160276	3.56617	1.66e-08
TC1660464	KIF6_HUMAN (Q6ZMV9) Kinesin-like protein KIF6, partial (11%) [TC1660464]		3.56616	1.97e-09
Cops2	Mus musculus COP9 (constitutive photomorphogenic) homolog, subunit 2 (Arabidopsis thaliana) (Cops2), mRNA [NM_009939]	NM_009939	3.5661	6.76e-06
N4bp2l1	Mus musculus NEDD4 binding protein 2-like 1 (N4bp2l1), mRNA [NM_133898]	NM_133898	3.56528	1.09e-11
Mapk9	Mus musculus mitogen-activated protein kinase 9 (Mapk9), transcript variant 2, mRNA [NM_016961]	NM_016961	3.56315	5.02e-12
Ccl11	Mus musculus chemokine (C-C motif) ligand 11 (Ccl11), mRNA [NM_011330]	NM_011330	3.56307	0.00029
Lin7b	Mus musculus lin-7 homolog B (C. elegans) (Lin7b), mRNA [NM_011698]	NM_011698	3.55969	2.09e-11
Cct3	Mus musculus 13 days embryo male testis cDNA, RIKEN full-length enriched library, clone:6030403E12 product:chaperonin subunit 3 (gamma), full insert sequence. [AK031293]	AK031293	3.5577	2.38e-11
Asf1a	Mus musculus ASF1 anti-silencing function 1 homolog A (S. cerevisiae) (Asf1a), mRNA [NM_025541]	NM_025541	3.55636	1.38e-08
Unc13b	Mus musculus 0 day neonate skin cDNA, RIKEN full-length enriched library, clone:4632410H01 product:Renal munc13 homolog [Mus musculus], full insert sequence. [AK161056]	AK161056	3.55461	9.19e-08
Ireb2	Mus musculus adult male diencephalon cDNA, RIKEN full-length enriched library, clone:9330164J05 product:IRP2, IRON-RESPONSIVE ELEMENT-BINDING PROTEIN/IRON REGULATORY PROTEIN 2 (FRAGMENT) homolog [Homo sapiens], full insert sequence. [AK034218]	AK034218	3.55448	4.74e-12
Arhgap26	Mus musculus Rho GTPase activating protein 26 (Arhgap26), mRNA [NM_175164]	NM_175164	3.55428	2.11e-11
Lsm6	Mus musculus LSM6 homolog, U6 small nuclear RNA associated (S. cerevisiae) (Lsm6), mRNA [NM_030145]	BC098230	3.55327	1.87e-11
Prkra	Mus musculus protein kinase, interferon inducible double stranded RNA dependent activator (Prkra), mRNA [NM_011871]	NM_011871	3.55276	4.69e-12
Creb3	Mus musculus cAMP responsive element binding protein 3 (Creb3), mRNA [NM_013497]	NM_013497	3.55272	4.66e-12
N4bp2l2	Mus musculus 9 days embryo whole body cDNA, RIKEN full-length enriched library, clone:D030069J18 product:unclassifiable, full insert sequence. [AK083711]	AK156115	3.55162	2.85e-08
Tceal3	Mus musculus transcription elongation factor A (SII)-like 3 (Tceal3), mRNA [NM_001029978]	NM_025355	3.55093	4.78e-12
AK054284	Mus musculus 2 days pregnant adult female ovary cDNA, RIKEN full-length enriched library, clone:E330010G20 product:unclassifiable, full insert sequence. [AK054284]	AK054284	3.55002	2.96e-11
AK087958	Mus musculus 2 days neonate thymus thymic cells cDNA, RIKEN full-length enriched library, clone:E430001I12 product:unclassifiable, full insert sequence. [AK087958]	AK087958	3.54754	1.39e-09
Sfxn3	Mus musculus sideroflexin 3 (Sfxn3), mRNA [NM_053197]	NM_053197	3.54511	4.88e-12
Uxs1	Mus musculus 11 days embryo gonad cDNA, RIKEN full-length enriched library, clone:7030408E13 product:unclassifiable, full insert sequence [AK078575]	AK078575	3.54449	6e-05
Tsen2	Mus musculus 10 days neonate cortex cDNA, RIKEN full-length enriched library, clone:A830098H17 product:unclassifiable, full insert sequence [AK044190]	AK044190	3.5438	5.8e-06
NAP030643-1	Unknown		3.54376	6.37e-12
AK085462	Mus musculus 0 day neonate kidney cDNA, RIKEN full-length enriched library, clone:D630029P09 product:unclassifiable, full insert sequence [AK085462]	AK085462	3.54066	2.06e-10
Cnksr3	Mus musculus Cnksr family member 3 (Cnksr3), mRNA [NM_172546]	NM_172546	3.53934	5.78e-12
Igf1r	Mus musculus insulin-like growth factor I receptor (Igf1r), mRNA [NM_010513]	NM_010513	3.53855	5.41e-12
Meis1	Mus musculus Meis homeobox 1 (Meis1), mRNA [NM_010789]	NM_010789	3.53761	1.71e-07
Cdc42ep5	Mus musculus CDC42 effector protein (Rho GTPase binding) 5 (Cdc42ep5), mRNA [NM_021454]	NM_021454	3.53671	8.52e-12
Ppcs	Mus musculus phosphopantothenoylcysteine synthetase (Ppcs), mRNA [NM_026494]	NM_026494	3.53604	5.7e-12
AK085597	Mus musculus 0 day neonate kidney cDNA, RIKEN full-length enriched library, clone:D630045C10 product:unclassifiable, full insert sequence. [AK085597]	AK085597	3.53259	0.00015
Tceal3	Mus musculus transcription elongation factor A (SII)-like 3 (Tceal3), mRNA [NM_001029978]	NM_001029978	3.52962	5.72e-12
Pou3f3	Mus musculus POU domain, class 3, transcription factor 3 (Pou3f3), mRNA [NM_008900]	NM_008900	3.52947	8.44e-08
Rrn3	Mus musculus 0 day neonate eyeball cDNA, RIKEN full-length enriched library, clone:E130302O19 product:similar to TRANSCRIPTION INITIATION FACTOR IA PROTEIN [Homo sapiens], full insert sequence. [AK021410]	AK021410	3.52893	1.41e-11
Atp8b2	Mus musculus ATPase, class I, type 8B, member 2 (Atp8b2), mRNA [NM_001081182]	XM_283873	3.5283	6.12e-09
Rpp40	Mus musculus 0 day neonate cerebellum cDNA, RIKEN full-length enriched library, clone:C230071K24 product:similar to RIBONUCLEASE P PROTEIN SUBUNIT P40 (EC 3.1.26.5) (RNASEP PROTEIN P40) (RNASE P SUBUNIT 1) [Homo sapiens], full insert sequence [AK048810]	NM_145938	3.52586	2.34e-09
Stat5b	Mus musculus signal transducer and activator of transcription 5B (Stat5b), transcript variant 1, mRNA [NM_011489]	NM_011489	3.52474	5.46e-07
TC1467208	Unknown		3.52428	1.09e-06
Otud4	Mus musculus OTU domain containing 4 (Otud4), mRNA [NM_001081164]	XM_194424	3.52279	6.22e-12
Gna14	Mus musculus guanine nucleotide binding protein, alpha 14 (Gna14), mRNA [NM_008137]	NM_008137	3.52157	6.4e-12
Nudt11	Mus musculus nudix (nucleoside diphosphate linked moiety X)-type motif 11 (Nudt11), mRNA [NM_021431]	NM_021431	3.52	1.68e-11
Hadha	Mus musculus 9 days embryo whole body cDNA, RIKEN full-length enriched library, clone:D030026J11 product:hydroxyacyl-Coenzyme A dehydrogenase/3-ketoacyl-Coenzyme A thiolase/enoyl-Coenzyme A hydratase (trifunctional protein), alpha subunit, full insert sequence. [AK050856]	AK050856	3.51565	6.49e-11
Rpp25	Mus musculus ribonuclease P 25 subunit (human) (Rpp25), mRNA [NM_133982]	NM_133982	3.5152	9.45e-11
Usp53	Mus musculus adult male corpora quadrigemina cDNA, RIKEN full-length enriched library, clone:B230326M20 product:KIAA1350 PROTEIN (FRAGMENT) homolog [Homo sapiens], full insert sequence. [AK045953]	AK045953	3.51063	0.00062
TC1691665	Q8JZP8_MOUSE (Q8JZP8) Zfp689 protein, partial (7%) [TC1691665]		3.51034	5.72e-08
Ric3	Mus musculus adult male hypothalamus cDNA, RIKEN full-length enriched library, clone:A230057E24 product:RIC3 isoform d homolog [Homo sapiens], full insert sequence. [AK038724]	AK038724	3.50738	2.81e-11
Pus7	Mus musculus pseudouridylate synthase 7 homolog (S. cerevisiae) (Pus7), mRNA [NM_178403]	NM_178403	3.50722	2.41e-10
Magea1	Mus musculus melanoma antigen, family A, 1 (Magea1), mRNA [NM_020015]	NM_020015	3.50623	3.62e-11
Dock7	Mus musculus dedicator of cytokinesis 7 (Dock7), mRNA [NM_026082]	NM_026082	3.50529	6.32e-12
Fam40b	Mus musculus family with sequence similarity 40, member B (Fam40b), transcript variant 1, mRNA [NM_177204]	NM_177204	3.50225	6.62e-12
Dynll2	Mus musculus dynein light chain LC8-type 2 (Dynll2), mRNA [NM_026556]	NM_026556	3.49845	6.64e-12
Tfrc	Mus musculus transferrin receptor (Tfrc), mRNA [NM_011638]	NM_011638	3.49719	1.84e-28
Abcb10	Mus musculus ATP-binding cassette, sub-family B (MDR/TAP), member 10 (Abcb10), nuclear gene encoding mitochondrial protein, mRNA [NM_019552]	NM_019552	3.4957	1.17e-09
Trmt11	Mus musculus 13 days embryo head cDNA, RIKEN full-length enriched library, clone:3110045I18 product:similar to MDS024 [Homo sapiens], full insert sequence. [AK014181]	AK014181	3.49511	7e-09
Arl4d	Mus musculus ADP-ribosylation factor-like 4D (Arl4d), mRNA [NM_025404]	NM_025404	3.49488	6.83e-12
Slc1a6	Mus musculus solute carrier family 1 (high affinity aspartate/glutamate transporter), member 6 (Slc1a6), mRNA [NM_009200]	NM_009200	3.49163	8.21e-12
Nars2	Mus musculus asparaginyl-tRNA synthetase 2 (mitochondrial)(putative) (Nars2), nuclear gene encoding mitochondrial protein, mRNA [NM_153591]	NM_153591	3.49119	2.72e-11
Cecr5	Mus musculus cat eye syndrome chromosome region, candidate 5 homolog (human) (Cecr5), mRNA [NM_144815]	NM_144815	3.49066	1.1e-11
Dhx36	Mus musculus 0 day neonate head cDNA, RIKEN full-length enriched library, clone:4832414O22 product:unclassifiable, full insert sequence [AK029289]	AK029289	3.49049	1.17e-08
Scye1	Mus musculus adult male bone cDNA, RIKEN full-length enriched library, clone:9830137A06 product:unclassifiable, full insert sequence. [AK036573]	AK036573	3.49005	2e-05
AK085074	Mus musculus 13 days embryo lung cDNA, RIKEN full-length enriched library, clone:D430033K11 product:unclassifiable, full insert sequence. [AK085074]	AK085074	3.48865	0.0009
Mal2	Mus musculus mal, T-cell differentiation protein 2 (Mal2), mRNA [NM_178920]	NM_178920	3.4876	0.00433
2012-09-06	Mus musculus septin 6 (Sept6), mRNA [NM_019942]	NM_019942	3.48677	8.62e-12
Tcfe3	Mus musculus transcription factor E3 (Tcfe3), transcript variant 1, mRNA [NM_172472]	NM_172472	3.48191	8.24e-12
Nr0b2	Mus musculus nuclear receptor subfamily 0, group B, member 2 (Nr0b2), mRNA [NM_011850]	NM_011850	3.48143	0.00014
Ssh1	Mus musculus mRNA for mKIAA1298 protein. [AK173144]	AK173144	3.48055	8.76e-12
Sms	Mus musculus spermine synthase (Sms), mRNA [NM_009214]	NM_009214	3.48013	1.08e-10
Tom1l1	Mus musculus target of myb1-like 1 (chicken) (Tom1l1), mRNA [NM_028011]	AK083630	3.47778	1.14e-11
Amh	Mus musculus anti-Mullerian hormone (Amh), mRNA [NM_007445]	NM_007445	3.47666	1.54e-10
2010107G23Rik	Mus musculus RIKEN cDNA 2010107G23 gene (2010107G23Rik), mRNA [NM_027251]	NM_027251	3.47634	8.61e-12
Xist	Mouse nuclear-localized inactive X-specific transcript (Xist) mRNA [L04961]	L04961	3.47469	3.98e-06
Gspt1	Mus musculus adult male thymus cDNA, RIKEN full-length enriched library, clone:5830445I05 product:G1 to phase transition 1, full insert sequence. [AK134128]	AK134128	3.47262	1.7e-07
Ccbe1	Mus musculus collagen and calcium binding EGF domains 1 (Ccbe1), mRNA [NM_178793]	BC103803	3.47254	9.14e-12
Thoc2	Mus musculus adult male aorta and vein cDNA, RIKEN full-length enriched library, clone:A530039L08 product:unclassifiable, full insert sequence. [AK040892]	AK040892	3.47194	8.19e-12
Zfp219	Mus musculus zinc finger protein 219 (Zfp219), mRNA [NM_027248]	NM_027248	3.46759	8.08e-12
1700065O13Rik	Mus musculus RIKEN cDNA 1700065O13 gene (1700065O13Rik), mRNA [NM_028543]	NM_028543	3.46671	2.67e-08
Rhbdf2	Mus musculus rhomboid 5 homolog 2 (Drosophila) (Rhbdf2), mRNA [NM_172572]	NM_172572	3.46649	9.76e-12
Ero1l	Mus musculus ERO1-like (S. cerevisiae) (Ero1l), mRNA [NM_015774]	NM_015774	3.46641	1e-09
Hs6st1	Mus musculus heparan sulfate 6-O-sulfotransferase 1 (Hs6st1), mRNA [NM_015818]	NM_015818	3.46629	8.18e-12
OTTMUSG00000003947	Mus musculus 16 days neonate cerebellum cDNA, RIKEN full-length enriched library, clone:9630002G20 product:hypothetical protein, full insert sequence [AK137302]	AK137302	3.46586	8.23e-12
Rnf144a	Mus musculus ring finger protein 144A (Rnf144a), transcript variant 2, mRNA [NM_080563]	NM_080563	3.4647	3e-05
LOC100045515	PREDICTED: Mus musculus hypothetical protein LOC100045515 (LOC100045515), mRNA [XM_001474431]	AK039631	3.45432	2.39e-11
Prkci	Mus musculus protein kinase C, iota (Prkci), mRNA [NM_008857]	NM_008857	3.45266	1.12e-11
Lrrc8d	Mus musculus leucine rich repeat containing 8D (Lrrc8d), transcript variant 2, mRNA [NM_178701]	NM_178701	3.44904	9.61e-12
Slco1a5	Mus musculus solute carrier organic anion transporter family, member 1a5 (Slco1a5), mRNA [NM_130861]	NM_130861	3.44803	7.37e-08
Mgea5	Mus musculus meningioma expressed antigen 5 (hyaluronidase) (Mgea5), mRNA [NM_023799]	NM_023799	3.44803	9.2e-12
Slc25a42	Mus musculus solute carrier family 25, member 42 (Slc25a42), mRNA [NM_001007570]	NM_001007570	3.44683	1.44e-07
Eftud1	Mus musculus 12 days embryo spinal cord cDNA, RIKEN full-length enriched library, clone:C530042K08 product:weakly similar to ELONGATION FACTOR 2-LIKE PROTEIN [Schizosaccharomyces pombe], full insert sequence. [AK049698]	AK049698	3.44656	0.00392
AK078412	Mus musculus 12 days embryo male wolffian duct includes surrounding region cDNA, RIKEN full-length enriched library, clone:6720431F06 product:unclassifiable, full insert sequence. [AK078412]	AK078412	3.44641	3.82e-09
Exoc1	Mus musculus 7 days neonate cerebellum cDNA, RIKEN full-length enriched library, clone:A730011E05 product:CDNA FLJ10893 FIS, CLONE NT2RP4002791 homolog [Homo sapiens], full insert sequence [AK042620]	XM_973518	3.44609	1.16e-09
AK047019	Mus musculus 10 days neonate cerebellum cDNA, RIKEN full-length enriched library, clone:B930011K02 product:unclassifiable, full insert sequence. [AK047019]	AK047019	3.44604	2.19e-11
Bcat2	Mus musculus branched chain aminotransferase 2, mitochondrial (Bcat2), nuclear gene encoding mitochondrial protein, mRNA [NM_009737]	NM_009737	3.44568	1.1e-11
TC1685550	Unknown		3.44545	0.00019
Lgr4	Mus musculus leucine-rich repeat-containing G protein-coupled receptor 4 (Lgr4), mRNA [NM_172671]	AK033699	3.44425	1.2e-11
Gsta4	Mus musculus glutathione S-transferase, alpha 4 (Gsta4), mRNA [NM_010357]	NM_010357	3.44382	8.29e-28
Tsp50	Mus musculus testes-specific protease 50 (Tsp50), mRNA [NM_146227]	NM_146227	3.44336	1.26e-11
Ptprd	Mus musculus mRNA for MPTPdelta, complete cds. [D13903]	D13903	3.44268	1.08e-11
Usp22	Mus musculus ubiquitin specific peptidase 22 (Usp22), mRNA [NM_001004143]	AK155071	3.44038	1.59e-11
Stac2	Mus musculus SH3 and cysteine rich domain 2 (Stac2), mRNA [NM_146028]	NM_146028	3.43992	6.1e-09
Sec62	Mus musculus SEC62 homolog (S. cerevisiae) (Sec62), mRNA [NM_027016]	NM_027016	3.43988	1e-05
Pfas	phosphoribosylformylglycinamidine synthase (FGAR amidotransferase) Gene [Source:MGI (curated);Acc:Pfas-001] [ENSMUST00000021282]	XM_111232	3.43974	8.57e-07
BC058422	Mus musculus cDNA clone IMAGE:5689029, partial cds [BC058422]	XM_904598	3.43883	0.00013
Fam113b	Mus musculus family with sequence similarity 113, member B (Fam113b), mRNA [NM_172293]	NM_172293	3.4388	1.15e-11
Phf17	Mus musculus PHD finger protein 17 (Phf17), transcript variant 1, mRNA [NM_172303]	NM_172303	3.43398	1.06e-11
Gas7	Mus musculus growth arrest specific 7 (Gas7), transcript variant 1, mRNA [NM_008088]	NM_008088	3.43392	3.17e-10
2012-09-14	Mus musculus septin 14 (Sept14), mRNA [NM_028826]	AK006043	3.43041	1.13e-11
2610001A08Rik	Mus musculus 10 days embryo whole body cDNA, RIKEN full-length enriched library, clone:2610001A08 product:unclassifiable, full insert sequence. [AK011250]	AK011250	3.42928	4.33e-07
Ctnna2	Mus musculus mRNA for alpha N-catenin II, complete cds. [D25282]	NM_009819	3.42918	1.32e-11
Gprc5b	Mus musculus G protein-coupled receptor, family C, group 5, member B (Gprc5b), mRNA [NM_022420]	NM_022420	3.42819	1.08e-11
Cyb5r1	Mus musculus cytochrome b5 reductase 1 (Cyb5r1), mRNA [NM_028057]	NM_028057	3.42745	1.06e-11
AK163888	Mus musculus 0 day neonate cerebellum cDNA, RIKEN full-length enriched library, clone:C230017N01 product:hypothetical protein, full insert sequence [AK163888]	AK037264	3.42711	1.52e-06
Avl9	Mus musculus cDNA, RIKEN full-length enriched library, clone:M5C1021L22 product:hypothetical protein, full insert sequence [AK147365]	AK147365	3.42663	1.36e-11
Psat1	Mus musculus phosphoserine aminotransferase 1 (Psat1), mRNA [NM_177420]	NM_177420	3.42552	1.1e-11
Scml2	Mus musculus sex comb on midleg-like 2 (Drosophila) (Scml2), mRNA [NM_133194]	AK031490	3.42414	1.56e-11
Hopx	Mus musculus HOP homeobox (Hopx), mRNA [NM_175606]	NM_175606	3.42255	1.12e-11
Snph	Mus musculus syntaphilin (Snph), mRNA [NM_198214]	NM_198214	3.41972	3.58e-06
AK052024	Mus musculus 12 days embryo eyeball cDNA, RIKEN full-length enriched library, clone:D230036L12 product:unclassifiable, full insert sequence. [AK052024]	AK052024	3.41922	0.00293
Usp15	Mus musculus mRNA for mKIAA0529 protein. [AK122301]	AK122301	3.41845	6.57e-10
Prmt3	Mus musculus 0 day neonate cerebellum cDNA, RIKEN full-length enriched library, clone:C230012J03 product:unclassifiable, full insert sequence [AK082136]	AK082136	3.41657	1.33e-10
2410002F23Rik	Mus musculus RIKEN cDNA 2410002F23 gene, mRNA (cDNA clone MGC:69849 IMAGE:6821248), complete cds. [BC059896]	NM_025880	3.4145	1.17e-10
Mlxip	Mus musculus MLX interacting protein (Mlxip), transcript variant 2, mRNA [NM_133917]	BC067045	3.41151	4.33e-11
Usp28	Mus musculus ubiquitin specific peptidase 28 (Usp28), mRNA [NM_175482]	NM_175482	3.40984	1.2e-11
Gata1	Mus musculus GATA binding protein 1 (Gata1), mRNA [NM_008089]	NM_008089	3.40871	2.24e-27
Slc24a5	Mus musculus solute carrier family 24, member 5 (Slc24a5), mRNA [NM_175034]	NM_175034	3.40601	8.21e-11
Tpmt	Mus musculus thiopurine methyltransferase (Tpmt), mRNA [NM_016785]	NM_016785	3.40601	1.52e-11
Syt14	Mus musculus synaptotagmin XIV (Syt14), mRNA [NM_181546]	NM_181546	3.4051	3.04e-06
Clock	Mus musculus circadian locomoter output cycles kaput (Clock), mRNA [NM_007715]	NM_007715	3.40399	4.98e-09
Gnas	Mus musculus 10 days neonate head cDNA, RIKEN full-length enriched library, clone:5530400H20 product:novel noncoding RNA overlapping the exon 1A, 1 and 2 of Gnas, full insert sequence. [AK017423]	AK017423	3.4028	1.98e-11
AK034805	Mus musculus 12 days embryo embryonic body between diaphragm region and neck cDNA, RIKEN full-length enriched library, clone:9430041F05 product:unclassifiable, full insert sequence. [AK034805]	AK034805	3.4017	1.5e-06
Bcat2	Mus musculus branched chain aminotransferase 2, mitochondrial (Bcat2), nuclear gene encoding mitochondrial protein, mRNA [NM_009737]	NM_009737	3.4008	2.07e-11
Fam178a	Mus musculus family with sequence similarity 178, member A (Fam178a), mRNA [NM_001081225]	XM_901708	3.39873	1.34e-11
Porcn	Mus musculus porcupine homolog (Drosophila) (Porcn), transcript variant Mporc-d, mRNA [NM_023638]	NM_023638	3.39717	1.93e-11
Cryge	Mus musculus crystallin, gamma E (Cryge), mRNA [NM_007777]	NM_007777	3.39715	5.63e-07
Hist3h2ba	Mus musculus histone cluster 3, H2ba (Hist3h2ba), mRNA [NM_030082]	NM_030082	3.39623	1.66e-11
Entpd3	Mus musculus ectonucleoside triphosphate diphosphohydrolase 3 (Entpd3), mRNA [NM_178676]	NM_178676	3.39256	0.00019
Map2k4	Mus musculus mitogen-activated protein kinase kinase 4 (Map2k4), mRNA [NM_009157]	NM_009157	3.39008	1.4e-11
Twsg1	Mus musculus twisted gastrulation homolog 1 (Drosophila) (Twsg1), mRNA [NM_023053]	NM_023053	3.38997	1.6e-09
Hbp1	Mus musculus high mobility group box transcription factor 1 (Hbp1), transcript variant 2, mRNA [NM_177993]	NM_177993	3.38985	1.85e-11
Dctd	Mus musculus dCMP deaminase (Dctd), mRNA [NM_178788]	NM_178788	3.38854	3.22e-09
Tspan9	Mus musculus tetraspanin 9 (Tspan9), mRNA [NM_175414]	NM_175414	3.38757	0.00277
Foxp4	Mus musculus forkhead box P4 (Foxp4), transcript variant 3, mRNA [NM_028767]	NM_028767	3.38729	4.73e-07
Dip2c	Mus musculus DIP2 disco-interacting protein 2 homolog C (Drosophila) (Dip2c), mRNA [NM_001081426]	BC089303	3.38483	3.63e-10
A_52_P549754	Unknown		3.38367	3.1e-10
Stard5	Mus musculus StAR-related lipid transfer (START) domain containing 5 (Stard5), mRNA [NM_023377]	NM_023377	3.38278	1.15e-09
Pygb	Mus musculus brain glycogen phosphorylase (Pygb), mRNA [NM_153781]	NM_153781	3.38134	1.78e-11
Etv4	Mus musculus ets variant gene 4 (E1A enhancer binding protein, E1AF) (Etv4), mRNA [NM_008815]	NM_008815	3.38058	3.46e-11
Utp14a	Mus musculus UTP14, U3 small nucleolar ribonucleoprotein, homolog A (yeast) (Utp14a), mRNA [NM_028276]	NM_028276	3.37886	1.04e-06
Otop2	Mus musculus otopetrin 2 (Otop2), mRNA [NM_172801]	NM_172801	3.37523	1.68e-11
Rbm35a	Mus musculus RNA binding motif protein 35A (Rbm35a), mRNA [NM_194055]	NM_194055	3.37477	3.13e-10
Rfwd3	Mus musculus adult male corpora quadrigemina cDNA, RIKEN full-length enriched library, clone:B230214I19 product:hypothetical Peptidase S9A, prolyl oligopeptidase, N-terminal beta-propeller domain containing protein, full insert sequence. [AK045601]	AK045601	3.37197	2.6e-09
Cdc42ep5	Mus musculus CDC42 effector protein (Rho GTPase binding) 5 (Cdc42ep5), mRNA [NM_021454]	NM_021454	3.36916	1.71e-11
Slc4a2	Mus musculus solute carrier family 4 (anion exchanger), member 2 (Slc4a2), mRNA [NM_009207]	NM_009207	3.36802	1.59e-11
Sdsl	Mus musculus serine dehydratase-like (Sdsl), mRNA [NM_133902]	NM_133902	3.36744	1.67e-11
Hdac6	Mus musculus histone deacetylase 6 (Hdac6), transcript variant 1, mRNA [NM_010413]	NM_010413	3.36694	1.6e-11
Epc1	Mus musculus enhancer of polycomb homolog 1 (Drosophila), mRNA (cDNA clone IMAGE:6413718), complete cds. [BC055805]	BC055805	3.3663	1.9e-06
Foxj3	Mus musculus forkhead box J3 (Foxj3), mRNA [NM_172699]	NM_172699	3.36579	0.00059
4930583H14Rik	Mus musculus RIKEN cDNA 4930583H14 gene (4930583H14Rik), mRNA [NM_026358]	NM_026358	3.36427	1.63e-11
Cadm1	Mus musculus cell adhesion molecule 1 (Cadm1), transcript variant 1, mRNA [NM_207675]	NM_207675	3.36233	1.66e-11
AK044177	Mus musculus 10 days neonate cortex cDNA, RIKEN full-length enriched library, clone:A830097K04 product:unclassifiable, full insert sequence. [AK044177]	AK044177	3.36212	1.73e-10
1700018G05Rik	PREDICTED: Mus musculus RIKEN cDNA 1700018G05 gene (1700018G05Rik), mRNA [XM_988035]	XM_988035	3.36152	1.66e-11
NAP108362-1	Unknown		3.36099	2.46e-11
AK078845	Mus musculus adult male colon cDNA, RIKEN full-length enriched library, clone:9030016H15 product:weakly similar to 1810062O18RIK PROTEIN [Mus musculus], full insert sequence [AK078845]	AK078845	3.36029	3.8e-11
Bzw1	Mus musculus basic leucine zipper and W2 domains 1 (Bzw1), mRNA [NM_025824]	NM_025824	3.35985	1.78e-11
Cdc42ep5	Mus musculus CDC42 effector protein (Rho GTPase binding) 5 (Cdc42ep5), mRNA [NM_021454]	NM_021454	3.35807	1.8e-11
Dgcr14	Mus musculus DiGeorge syndrome critical region gene 14 (Dgcr14), transcript variant 2, mRNA [NM_001081633]	BC013711	3.35475	2.35e-11
Samd8	Mus musculus sterile alpha motif domain containing 8 (Samd8), mRNA [NM_026283]	NM_026283	3.35459	2.54e-11
Jhdm1d	Mus musculus jumonji C domain-containing histone demethylase 1 homolog D (S. cerevisiae) (Jhdm1d), mRNA [NM_001033430]	AK129429	3.3544	1.76e-11
Arf3	Mus musculus ADP-ribosylation factor 3 (Arf3), mRNA [NM_007478]	NM_007478	3.35275	1.78e-11
Amigo1	Mus musculus adhesion molecule with Ig like domain 1 (Amigo1), mRNA [NM_146137]	NM_146137	3.35216	1.59e-08
2810408M09Rik	Mus musculus RIKEN cDNA 2810408M09 gene (2810408M09Rik), mRNA [NM_001007581]	NM_001007581	3.35213	1.12e-26
Zmym3	Mus musculus zinc finger, MYM-type 3 (Zmym3), mRNA [NM_019831]	NM_019831	3.3516	1.78e-11
Lyplal1	Mus musculus lysophospholipase-like 1 (Lyplal1), mRNA [NM_146106]	NM_146106	3.35144	6.79e-10
AK048968	Mus musculus 0 day neonate cerebellum cDNA, RIKEN full-length enriched library, clone:C230086L09 product:unclassifiable, full insert sequence. [AK048968]	AK048968	3.35102	3.55e-08
Slc25a21	Mus musculus solute carrier family 25 (mitochondrial oxodicarboxylate carrier), member 21 (Slc25a21), nuclear gene encoding mitochondrial protein, mRNA [NM_172577]	NM_172577	3.34951	3.09e-06
Ftsjd1	Mus musculus FtsJ methyltransferase domain containing 1 (Ftsjd1), mRNA [NM_146215]	NM_146215	3.34869	1.56e-08
AK084210	Mus musculus 12 days embryo eyeball cDNA, RIKEN full-length enriched library, clone:D230009E21 product:unclassifiable, full insert sequence [AK084210]	AK084210	3.34841	0.00814
Ptplb	Mus musculus protein tyrosine phosphatase-like (proline instead of catalytic arginine), member b (Ptplb), mRNA [NM_023587]	NM_023587	3.34648	4.07e-11
Caprin2	Mus musculus caprin family member 2 (Caprin2), mRNA [NM_181541]	XM_901216	3.34527	1.88e-11
AK083933	Mus musculus 12 days embryo spinal ganglion cDNA, RIKEN full-length enriched library, clone:D130064M10 product:unclassifiable, full insert sequence. [AK083933]	AK083933	3.34523	1.3e-08
3110001K24Rik	Mus musculus in vitro fertilized eggs cDNA, RIKEN full-length enriched library, clone:7420433P05 product:hypothetical protein, full insert sequence. [AK162134]	AK162134	3.34455	6.73e-06
Kctd6	Mus musculus potassium channel tetramerisation domain containing 6 (Kctd6), mRNA [NM_027782]	NM_027782	3.3445	2.31e-11
Dynll2	Mus musculus dynein light chain LC8-type 2 (Dynll2), mRNA [NM_026556]	NM_026556	3.34432	1.87e-11
Lonrf1	Mus musculus LON peptidase N-terminal domain and ring finger 1 (Lonrf1), mRNA [NM_001081150]	XM_146279	3.34361	7.03e-11
Phf21b	Mus musculus PHD finger protein 21B (Phf21b), mRNA [NM_001081166]	XM_001003571	3.34361	2.43e-11
Twistnb	Mus musculus TWIST neighbor (Twistnb), mRNA [NM_172253]	NM_172253	3.33941	9.5e-11
Soat1	Mus musculus sterol O-acyltransferase 1 (Soat1), mRNA [NM_009230]	NM_009230	3.33931	1.95e-11
Fbxl19	Mus musculus F-box and leucine-rich repeat protein 19 (Fbxl19), mRNA [NM_172748]	NM_172748	3.33835	1.97e-11
Rdh13	Mus musculus B6-derived CD11 +ve dendritic cells cDNA, RIKEN full-length enriched library, clone:F730034M24 product:unclassifiable, full insert sequence [AK089458]	AK089458	3.33561	2.36e-08
AK051538	Mus musculus 12 days embryo spinal ganglion cDNA, RIKEN full-length enriched library, clone:D130055E11 product:unclassifiable, full insert sequence [AK051538]	AK051538	3.33503	4e-05
Cnksr3	Mus musculus Cnksr family member 3 (Cnksr3), mRNA [NM_172546]	NM_172546	3.33331	2.09e-11
Sh3gl2	Mus musculus adult male urinary bladder cDNA, RIKEN full-length enriched library, clone:9530001L19 product:SH3 DOMAIN PROTEIN 2A homolog [Mus musculus], full insert sequence. [AK035210]	AK035210	3.33198	0.00218
P4ha1	Mus musculus procollagen-proline, 2-oxoglutarate 4-dioxygenase (proline 4-hydroxylase), alpha 1 polypeptide (P4ha1), mRNA [NM_011030]	NM_011030	3.33151	1.04e-08
Nolc1	Mus musculus nucleolar and coiled-body phosphoprotein 1 (Nolc1), transcript variant 3, mRNA [NM_001039352]	NM_001039352	3.32943	1.72e-10
Fgf13	Mus musculus fibroblast growth factor 13 (Fgf13), mRNA [NM_010200]	NM_010200	3.32881	2.86e-09
Ncor2	Mus musculus nuclear receptor co-repressor 2 (Ncor2), mRNA [NM_011424]	NM_011424	3.32782	2.43e-11
Akr1b7	Mus musculus aldo-keto reductase family 1, member B7 (Akr1b7), mRNA [NM_009731]	NM_009731	3.32714	2.39e-09
Higd1a	Mus musculus HIG1 domain family, member 1A (Higd1a), mRNA [NM_019814]	NM_019814	3.3271	4.28e-11
Tcra	Mus musculus SJL-7A5 T cell receptor alpha chain mRNA, complete cds. [U07662]	U07662	3.32659	5.52e-06
Zfp219	Mus musculus zinc finger protein 219 (Zfp219), mRNA [NM_027248]	NM_027248	3.32601	2.7e-11
G3bp2	Mus musculus GTPase activating protein (SH3 domain) binding protein 2 (G3bp2), transcript variant 3, mRNA [NM_001080795]	BC048176	3.32584	2.13e-11
Gstm1	Mus musculus glutathione S-transferase, mu 1 (Gstm1), mRNA [NM_010358]	NM_010358	3.32454	2.15e-11
BC022654	Mus musculus, clone IMAGE:4219318, mRNA [BC022654]	BC022654	3.32402	2.51e-11
Rnf135	Mus musculus ring finger protein 135 (Rnf135), mRNA [NM_028019]	NM_028019	3.32355	2.77e-11
Dmrtc1c2	Mus musculus DMRT-like family C1c2 (Dmrtc1c2), mRNA [NM_001142690]	AK016891	3.32257	2.77e-11
Gng7	Mus musculus guanine nucleotide binding protein (G protein), gamma 7 (Gng7), transcript variant 1, mRNA [NM_001038655]	NM_010319	3.32221	0.0001
Satb1	Mus musculus special AT-rich sequence binding protein 1 (Satb1), mRNA [NM_009122]	NM_009122	3.3219	4.66e-11
Rab11a	Mus musculus RAB11a, member RAS oncogene family (Rab11a), mRNA [NM_017382]	AK147122	3.32136	4.12e-11
Ric3	Mus musculus resistance to inhibitors of cholinesterase 3 homolog (C. elegans) (Ric3), transcript variant 1, mRNA [NM_001038624]	NM_001038624	3.32123	0.0006
Adipor2	Mus musculus adiponectin receptor 2 (Adipor2), mRNA [NM_197985]	NM_197985	3.31834	2.24e-11
Phgdh	Mus musculus 3-phosphoglycerate dehydrogenase (Phgdh), mRNA [NM_016966]	NM_016966	3.31702	2.27e-11
Fam184b	Mus musculus 0 day neonate cerebellum cDNA, RIKEN full-length enriched library, clone:C230091O15 product:unclassifiable, full insert sequence. [AK049020]	AK049020	3.31563	0.00338
Ap3s2	Mus musculus adaptor-related protein complex 3, sigma 2 subunit (Ap3s2), mRNA [NM_009682]	NM_009682	3.31325	4.05e-07
Fam135a	Mus musculus premature mRNA for mKIAA1411 protein [AK173166]	AK173166	3.31311	6.28e-11
Igsf11	Mus musculus immunoglobulin superfamily, member 11 (Igsf11), mRNA [NM_170599]	NM_170599	3.31164	4.16e-11
Slc25a30	Mus musculus osteoclast-like cell cDNA, RIKEN full-length enriched library, clone:I420029E17 product:similar to Brain mitochondrial carrier protein-1 (BMCP-1) (Mitochondrial uncoupling protein 5) (UCP 5) (Solute carrier family 25, member 14) (UNQ791 [AK159732]	AK159732	3.3113	3.13e-11
AK088797	Mus musculus 2 days neonate thymus thymic cells cDNA, RIKEN full-length enriched library, clone:E430026C01 product:unclassifiable, full insert sequence. [AK088797]	AK088797	3.31053	9.5e-07
Sec24a	Mus musculus Sec24 related gene family, member A (S. cerevisiae) (Sec24a), mRNA [NM_175255]	AK090341	3.31045	5.61e-11
Phf20	Mus musculus PHD finger protein 20 (Phf20), mRNA [NM_172674]	BC060121	3.31023	2.57e-11
Tmprss5	Mus musculus transmembrane protease, serine 5 (spinesin) (Tmprss5), mRNA [NM_030709]	NM_030709	3.30736	6.11e-10
Zfp451	Mus musculus mRNA for mKIAA1702 protein [AK122541]	AK122541	3.30687	9.63e-10
Eml5	Mus musculus echinoderm microtubule associated protein like 5 (Eml5), mRNA [NM_001081191]	AK044024	3.30668	3.31e-11
Ccnt2	Mus musculus activated spleen cDNA, RIKEN full-length enriched library, clone:F830012O13 product:cyclin T2, full insert sequence [AK156231]	AK156231	3.30661	1.22e-09
Sestd1	Mus musculus adult retina cDNA, RIKEN full-length enriched library, clone:A930010O20 product:unclassifiable, full insert sequence [AK044401]	AK044401	3.30349	3.65e-11
NAP027978-1	Unknown		3.30279	2.55e-10
Nap1l5	Mus musculus nucleosome assembly protein 1-like 5 (Nap1l5), mRNA [NM_021432]	NM_021432	3.3025	6.75e-07
Mettl8	Mus musculus methyltransferase like 8 (Mettl8), transcript variant a, mRNA [NM_145524]	NM_145524	3.30218	7.11e-07
Ly75	Mus musculus receptor DEC205 mRNA, complete cds [U19271]	NM_013825	3.30077	2.33e-07
Nfx1	Mus musculus nuclear transcription factor, X-box binding 1 (Nfx1), mRNA [NM_023739]	NM_023739	3.30073	9.5e-11
Zxdb	Mus musculus zinc finger, X-linked, duplicated B (Zxdb), mRNA [NM_001081473]	XR_002151	3.30059	7.43e-11
Ugt8a	Mus musculus UDP galactosyltransferase 8A (Ugt8a), mRNA [NM_011674]	NM_011674	3.3005	1.22e-09
1700045I19Rik	Mus musculus adult male testis cDNA, RIKEN full-length enriched library, clone:1700045I19 product:similar to HSD-4 PROTEIN [Homo sapiens], full insert sequence [AK006700]	NM_028842	3.30007	2.56e-11
Vkorc1l1	Mus musculus activated spleen cDNA, RIKEN full-length enriched library, clone:F830037H09 product:hypothetical protein, full insert sequence [AK172111]	AK172111	3.29935	3.7e-10
Myo7a	Mus musculus myosin VIIa (Myo7a), mRNA [NM_008663]	NM_008663	3.29389	2.69e-11
Rhox2a	Mus musculus reproductive homeobox 2A (Rhox2a), mRNA [NM_029203]	NM_029203	3.29325	2.78e-11
Wdr70	Mus musculus 14 days pregnant adult female amnion cDNA, RIKEN full-length enriched library, clone:I530016A19 product:unclassifiable, full insert sequence. [AK167464]	XM_974389	3.29269	4.77e-07
Smarce1	Mus musculus 7 days neonate cerebellum cDNA, RIKEN full-length enriched library, clone:A730043M03 product:unclassifiable, full insert sequence [AK042961]	AK042961	3.29223	0.00373
Dmxl1	Mus musculus Dmx-like 1 (Dmxl1), mRNA [NM_001081371]	AY590892	3.29118	5.67e-09
Dap3	Mus musculus adult male olfactory brain cDNA, RIKEN full-length enriched library, clone:6430514F02 product:death associated protein 3, full insert sequence. [AK032275]	AK032275	3.29117	3.8e-10
TC1628932	Q695W1_9CHAR (Q695W1) NADH dehydrogenase subunit 5 (Fragment), partial (3%) [TC1628932]		3.29107	6e-05
Bmpr1a	Mus musculus bone morphogenetic protein receptor, type 1A (Bmpr1a), mRNA [NM_009758]	NM_009758	3.28889	7.08e-07
Gucy1b2	Mus musculus guanylate cyclase 1, soluble, beta 2 (Gucy1b2), mRNA [NM_172810]	NM_172810	3.28778	4e-05
Dhtkd1	dehydrogenase E1 and transketolase domain containing 1 Gene [Source:MGI (curated);Acc:Dhtkd1-001] [ENSMUST00000095147]	XM_140800	3.28744	1.76e-06
Lrba	Mus musculus LPS-responsive beige-like anchor (Lrba), transcript variant 1, mRNA [NM_030695]	NM_030695	3.28561	3.3e-11
D130043K22Rik	Mus musculus RIKEN cDNA D130043K22 gene (D130043K22Rik), mRNA [NM_001081051]	AK122246	3.28541	1.95e-06
Inadl	Mus musculus InaD-like (Drosophila) (Inadl), transcript variant 1, mRNA [NM_172696]	NM_172696	3.28479	4.15e-07
Cdh2	Mus musculus 13 days embryo heart cDNA, RIKEN full-length enriched library, clone:D330048D07 product:cadherin 2, full insert sequence. [AK084821]	AK084821	3.28448	0.00033
Rab14	Mus musculus 9 days embryo whole body cDNA, RIKEN full-length enriched library, clone:D030017L14 product:RAB14, member RAS oncogene family, full insert sequence. [AK083451]	AK083451	3.28373	2.92e-11
1110036O03Rik	Mus musculus 0 day neonate head cDNA, RIKEN full-length enriched library, clone:4832408F05 product:SYNAPTONEMAL COMPLEX PROTEIN SC65 homolog [Rattus norvegicus], full insert sequence [AK029271]	AK029271	3.28332	3.31e-11
Sipa1l3	Mus musculus signal-induced proliferation-associated 1 like 3 (Sipa1l3), mRNA [NM_001081028]	AK172968	3.28305	3.25e-11
Mmd2	Mus musculus monocyte to macrophage differentiation-associated 2 (Mmd2), mRNA [NM_175217]	NM_175217	3.28209	2.92e-11
Hk2	Mus musculus hexokinase 2 (Hk2), mRNA [NM_013820]	NM_013820	3.28204	2.96e-11
Dab1	Mus musculus disabled homolog 1 (Drosophila) (Dab1), transcript variant 2, mRNA [NM_177259]	NM_177259	3.28198	0.00037
Gamt	Mus musculus guanidinoacetate methyltransferase (Gamt), mRNA [NM_010255]	NM_010255	3.28189	8.26e-26
A930041I02Rik	Mus musculus RIKEN cDNA A930041I02 gene (A930041I02Rik), mRNA [NM_178778]	NM_178778	3.28165	6e-05
Lrfn3	Mus musculus leucine rich repeat and fibronectin type III domain containing 3 (Lrfn3), mRNA [NM_175478]	NM_175478	3.28016	5.43e-11
100041876	Mus musculus 7 days neonate cerebellum cDNA, RIKEN full-length enriched library, clone:A730006P06 product:unclassifiable, full insert sequence [AK042572]	AK042572	3.27984	1.07e-06
4921505C17Rik	Mus musculus 0 day neonate cerebellum cDNA, RIKEN full-length enriched library, clone:C230066I17 product:hypothetical ARM repeat structure containing protein, full insert sequence. [AK082586]	AK082586	3.27939	1.04e-10
Homer1	Mus musculus homer homolog 1 (Drosophila) (Homer1), transcript variant d, mRNA [NM_152134]	NM_152134	3.27864	5.54e-10
Snhg11	Mus musculus small nucleolar RNA host gene 11 (non-protein coding) (Snhg11), mRNA [NM_175692]	BC028327	3.2781	4.79e-11
Dnase2a	Mus musculus adult male cecum cDNA, RIKEN full-length enriched library, clone:9130026D18 product:syntrophin associated serine/threonine kinase, full insert sequence. [AK018651]	AK018651	3.27634	8.26e-11
Apc	Mus musculus adenomatosis polyposis coli (Apc), mRNA [NM_007462]	AK137301	3.27522	1.28e-10
Spin1	Mus musculus spindlin 1 (Spin1), transcript variant 1, mRNA [NM_011462]	NM_011462	3.27445	3.07e-11
2610028A01Rik	Mus musculus RIKEN cDNA 2610028A01 gene (2610028A01Rik), mRNA [NM_028228]	NM_028228	3.27108	1.11e-10
4930402E16Rik	Mus musculus mRNA for mKIAA1990 protein [AK129472]	AK129472	3.26862	3.92e-11
Rundc3b	Mus musculus RUN domain containing 3B (Rundc3b), mRNA [NM_198620]	NM_198620	3.26782	4.21e-11
Usp47	Mus musculus 12 days embryo spinal ganglion cDNA, RIKEN full-length enriched library, clone:D130005F08 product:unclassifiable, full insert sequence. [AK083763]	AK083763	3.26734	2.46e-09
Appl2	Mus musculus adaptor protein, phosphotyrosine interaction, PH domain and leucine zipper containing 2 (Appl2), mRNA [NM_145220]	NM_145220	3.2662	3.36e-11
Wdr82	Mus musculus WD repeat domain containing 82 (Wdr82), mRNA [NM_029896]	AK037620	3.26283	3.4e-11
Ctnnd1	Mus musculus catenin (cadherin associated protein), delta 1 (Ctnnd1), transcript variant 1, mRNA [NM_007615]	NM_007615	3.26211	3.75e-10
D730040F13Rik	Likely ortholog of H. sapiens chromosome 9 open reading frame 5 (C9orf5) [Source:UniProtKB/TrEMBL;Acc:B1AZA5] [ENSMUST00000107609]	AK083983	3.26144	3.68e-11
NAP067064-1	Unknown		3.26064	1.63e-08
Gja6	Mus musculus gap junction protein, alpha 6 (Gja6), mRNA [NM_001001496]	NM_001001496	3.26003	3.45e-10
Sobp	Mus musculus sine oculis-binding protein homolog (Drosophila) (Sobp), mRNA [NM_175407]	NM_175407	3.25992	4.68e-11
Me2	Mus musculus malic enzyme 2, NAD(+)-dependent, mitochondrial (Me2), nuclear gene encoding mitochondrial protein, mRNA [NM_145494]	NM_145494	3.25947	4.97e-11
Ipp	Mus musculus 3 days neonate thymus cDNA, RIKEN full-length enriched library, clone:A630079A06 product:Actin-binding protein IPP, full insert sequence. [AK042290]	AK042290	3.25883	6.11e-07
Tbc1d30	Mus musculus TBC1 domain family, member 30, mRNA (cDNA clone IMAGE:6834536), containing frame-shift errors. [BC072607]	BC072607	3.25786	6.52e-10
Mapk12	Mus musculus mitogen-activated protein kinase 12 (Mapk12), mRNA [NM_013871]	NM_013871	3.2574	3.92e-11
Syt14	Mus musculus synaptotagmin XIV (Syt14), mRNA [NM_181546]	NM_181546	3.25672	5.04e-10
Wdr4	Mus musculus adult male hippocampus cDNA, RIKEN full-length enriched library, clone:C630028K13 product:WD repeat domain 4, full insert sequence [AK164160]	AK164160	3.25581	1.2e-09
Tktl1	Mus musculus transketolase-like 1 (Tktl1), mRNA [NM_031379]	NM_031379	3.25412	3.93e-11
Syap1	Mus musculus synapse associated protein 1 (Syap1), mRNA [NM_025932]	NM_025932	3.2541	3.58e-11
Fgf13	Mus musculus fibroblast growth factor 13 (Fgf13), mRNA [NM_010200]	NM_010200	3.25332	0.0099
Nkrf	Mus musculus NF-kappaB repressing factor (Nkrf), mRNA [NM_029891]	NM_029891	3.25322	7.49e-10
Phactr1	Mus musculus phosphatase and actin regulator 1 (Phactr1), transcript variant 3, mRNA [NM_001005748]	NM_198419	3.25312	1.13e-10
AK089884	Mus musculus activated spleen cDNA, RIKEN full-length enriched library, clone:F830043H10 product:unclassifiable, full insert sequence. [AK089884]	AK089884	3.24938	8e-05
Lonrf2	Mus musculus adult male hippocampus cDNA, RIKEN full-length enriched library, clone:2900060P06 product:hypothetical protein, full insert sequence. [AK013739]	AK013739	3.24646	6.29e-07
Wac	Mus musculus adult male hypothalamus cDNA, RIKEN full-length enriched library, clone:A230035H12 product:unclassifiable, full insert sequence [AK079535]	AK079535	3.24643	3.32e-10
AK033207	Mus musculus 15 days embryo male testis cDNA, RIKEN full-length enriched library, clone:8030461E11 product:unclassifiable, full insert sequence. [AK033207]	AK033207	3.24628	0.0001
Dhx40	Mus musculus DEAH (Asp-Glu-Ala-His) box polypeptide 40 (Dhx40), mRNA [NM_026191]	AV025990	3.2458	1.04e-10
Fhl1	Mus musculus four and a half LIM domains 1 (Fhl1), transcript variant 1, mRNA [NM_001077361]	NM_010211	3.24579	3.79e-11
Chst10	Mus musculus carbohydrate sulfotransferase 10 (Chst10), mRNA [NM_145142]	NM_145142	3.24494	6.99e-11
Wasl	Mus musculus Wiskott-Aldrich syndrome-like (human) (Wasl), mRNA [NM_028459]	NM_028459	3.24404	1.85e-10
Ccdc68	Mus musculus coiled-coil domain containing 68 (Ccdc68), mRNA [NM_201362]	NM_201362	3.24401	4.91e-11
Sec63	Mus musculus 11 days embryo spinal cord cDNA, RIKEN full-length enriched library, clone:G630026F06 product:unclassifiable, full insert sequence. [AK090248]	AK090248	3.24194	3.23e-10
Snhg11	Mus musculus small nucleolar RNA host gene 11 (non-protein coding) (Snhg11), mRNA [NM_175692]	NM_175692	3.24007	9.26e-09
Abhd6	Mus musculus abhydrolase domain containing 6 (Abhd6), mRNA [NM_025341]	NM_025341	3.23985	6.08e-11
Fam84a	Mus musculus family with sequence similarity 84, member A (Fam84a), mRNA [NM_029007]	NM_029007	3.23921	4.08e-11
Zfp251	Mus musculus adult male cecum cDNA, RIKEN full-length enriched library, clone:9130001M19 product:unclassifiable, full insert sequence. [AK018584]	AK018584	3.23905	4.02e-11
NAP029546-1	Unknown		3.23852	0.0004
Cdh16	Mus musculus cadherin 16 (Cdh16), mRNA [NM_007663]	NM_007663	3.23772	1.54e-08
Trim26	Mus musculus tripartite motif-containing 26 (Trim26), transcript variant 1, mRNA [NM_001025599]	NM_030698	3.2348	4.12e-11
Me2	Mus musculus malic enzyme 2, NAD(+)-dependent, mitochondrial (Me2), nuclear gene encoding mitochondrial protein, mRNA [NM_145494]	NM_145494	3.23265	4.35e-11
B4galt3	Mus musculus UDP-Gal:betaGlcNAc beta 1,4-galactosyltransferase, polypeptide 3 (B4galt3), mRNA [NM_020579]	NM_020579	3.23114	4.27e-11
Gpc4	Mus musculus adult male urinary bladder cDNA, RIKEN full-length enriched library, clone:9530073D23 product:unclassifiable, full insert sequence. [AK020640]	CF585279	3.23097	5.31e-11
E430014L09Rik	Mus musculus 16 days embryo lung cDNA, RIKEN full-length enriched library, clone:8430403D15 product:unclassifiable, full insert sequence. [AK033357]	AK033357	3.2304	7.59e-07
Rspo2	Mus musculus R-spondin 2 homolog (Xenopus laevis) (Rspo2), mRNA [NM_172815]	NM_172815	3.23022	9.21e-10
1500015O10Rik	Mus musculus RIKEN cDNA 1500015O10 gene (1500015O10Rik), mRNA [NM_024283]	NM_024283	3.22987	5.18e-11
TC1647801	Q3AD08_CARHZ (Q3AD08) Oligopeptide/dipeptide ABC transporter, permease protein, partial (6%) [TC1647801]		3.22944	3.17e-07
A_52_P932831	Unknown		3.22911	5.28e-10
2310047O13Rik	Mus musculus adult male thymus cDNA, RIKEN full-length enriched library, clone:5830410F13 product:unclassifiable, full insert sequence. [AK017916]	AK017916	3.22695	3.23e-06
Gnptab	Mus musculus N-acetylglucosamine-1-phosphate transferase, alpha and beta subunits (Gnptab), mRNA [NM_001004164]	NM_001004164	3.22685	1.66e-10
Sestd1	Mus musculus SEC14 and spectrin domains 1 (Sestd1), mRNA [NM_175465]	AK005322	3.22601	5.67e-11
Auts2	Mus musculus autism susceptibility candidate 2 (Auts2), mRNA [NM_177047]	AK147478	3.22386	5.57e-11
Mapk12	Mus musculus mitogen-activated protein kinase 12 (Mapk12), mRNA [NM_013871]	NM_013871	3.22384	5.16e-11
Rbm45	Mus musculus RNA binding motif protein 45 (Rbm45), mRNA [NM_153405]	NM_153405	3.22346	2e-05
Rnf44	Mus musculus ring finger protein 44 (Rnf44), mRNA [NM_134064]	NM_134064	3.22344	4.51e-11
2610002M06Rik	Mus musculus RIKEN cDNA 2610002M06 gene (2610002M06Rik), mRNA [NM_025921]	AK018397	3.22256	3.42e-10
Adipor1	Mus musculus 6 days neonate spleen cDNA, RIKEN full-length enriched library, clone:F430009C20 product:Adiponectin receptor protein 1, full insert sequence [AK143680]	AK143680	3.22192	4.75e-11
AK142990	Mus musculus 0 day neonate lung cDNA, RIKEN full-length enriched library, clone:E030029P08 product:unclassifiable, full insert sequence [AK142990]	BB533394	3.22174	0.00059
Hebp2	Mus musculus heme binding protein 2 (Hebp2), mRNA [NM_019487]	NM_019487	3.22	5.85e-11
Raf1	Mus musculus 16 days neonate cerebellum cDNA, RIKEN full-length enriched library, clone:9630056E02 product:v-raf-1 leukemia viral oncogene 1, full insert sequence. [AK036317]	AK036317	3.21818	4.3e-09
Mudeng	Mus musculus MU-2/AP1M2 domain containing, death-inducing (Mudeng), mRNA [NM_144535]	NM_144535	3.21796	1.96e-06
1810029B16Rik	Mus musculus RIKEN cDNA 1810029B16 gene, mRNA (cDNA clone MGC:28859 IMAGE:4511374), complete cds [BC016246]	BC016246	3.21739	0.00011
Vezt	Mus musculus vezatin, adherens junctions transmembrane protein (Vezt), mRNA [NM_172538]	NM_172538	3.21669	0.00035
AK086438	Mus musculus 15 days embryo head cDNA, RIKEN full-length enriched library, clone:D930028M24 product:unclassifiable, full insert sequence. [AK086438]	AK086438	3.21633	8.02e-08
Patz1	Mus musculus mazr mRNA for transcription factor MAZR, complete cds. [AB029397]	NM_019574	3.21369	8.86e-11
Nln	Mus musculus neurolysin (metallopeptidase M3 family) (Nln), mRNA [NM_029447]	NM_029447	3.2136	0.00105
Tlk1	Mus musculus tousled-like kinase 1 (Tlk1), mRNA [NM_172664]	NM_172664	3.21345	5.02e-11
5730507C01Rik	Mus musculus RIKEN cDNA 5730507C01 gene (5730507C01Rik), mRNA [NM_001033157]	NM_001033157	3.21312	4.52e-08
2810046L04Rik	Mus musculus RIKEN cDNA 2810046L04 gene, mRNA (cDNA clone IMAGE:5321620), partial cds. [BC025559]	BC025559	3.21195	2.53e-07
Phip	Mus musculus pleckstrin homology domain interacting protein (Phip), mRNA [NM_001081216]	XM_358384	3.21174	5.18e-10
Rnft2	Mus musculus ring finger protein, transmembrane 2 (Rnft2), transcript variant 1, mRNA [NM_172998]	NM_172998	3.21165	7.87e-11
Slc10a6	Mus musculus solute carrier family 10 (sodium/bile acid cotransporter family), member 6 (Slc10a6), mRNA [NM_029415]	NM_029415	3.21074	5.86e-10
Rwdd4a	Mus musculus RWD domain containing 4A (Rwdd4a), mRNA [NM_203507]	NM_203507	3.21016	7.34e-11
A630018P17Rik	Mus musculus RIKEN cDNA A630018P17 gene (A630018P17Rik), mRNA [NM_001007577]	NM_001007577	3.20836	6.51e-11
Eif2c3	Mus musculus 2 days pregnant adult female oviduct cDNA, RIKEN full-length enriched library, clone:E230013H22 product:weakly similar to DNA FOR HC1 LOCUS [Mus musculus], full insert sequence [AK087577]	AK087577	3.20804	2.33e-07
2810011L19Rik	Mus musculus RIKEN cDNA 2810011L19 gene, mRNA (cDNA clone IMAGE:6810678), partial cds [BC059025]	BC059025	3.20713	0.0009
LOC665931	Mus musculus 60S acidic ribosomal protein P2-like pseudogene, mRNA (cDNA clone IMAGE:4501749). [BC055860]	BC055860	3.2069	2e-05
Fam53a	Mus musculus family with sequence similarity 53, member A (Fam53a), mRNA [NM_178390]	NM_178390	3.20383	7.4e-11
AK041684	Mus musculus 3 days neonate thymus cDNA, RIKEN full-length enriched library, clone:A630029O19 product:unclassifiable, full insert sequence. [AK041684]	AK041684	3.20261	1.32e-10
Mink1	Mus musculus misshapen-like kinase 1 (zebrafish) (Mink1), transcript variant 4, mRNA [NM_001045964]	NM_176893	3.20204	7.4e-11
Zfp398	Mus musculus adult male colon cDNA, RIKEN full-length enriched library, clone:9030618B04 product:unclassifiable, full insert sequence [AK078886]	AK087897	3.20201	3.54e-10
Bivm	Mus musculus basic, immunoglobulin-like variable motif containing (Bivm), mRNA [NM_144558]	NM_144558	3.20183	8.52e-08
Timm22	Mus musculus translocase of inner mitochondrial membrane 22 homolog (yeast) (Timm22), nuclear gene encoding mitochondrial protein, mRNA [NM_019818]	NM_019818	3.20067	8e-05
Atm	Mus musculus ataxia telangiectasia mutated homolog (human) (Atm), mRNA [NM_007499]	AK048970	3.20055	7.74e-11
Jsrp1	Mus musculus junctional sarcoplasmic reticulum protein 1 (Jsrp1), mRNA [NM_028001]	NM_028001	3.19953	6.7e-11
Dmrt1	Mus musculus doublesex and mab-3 related transcription factor 1 (Dmrt1), mRNA [NM_015826]	NM_015826	3.19899	6.89e-11
Cdh2	Mus musculus cadherin 2 (Cdh2), mRNA [NM_007664]	NM_007664	3.19882	1.23e-10
2010011I20Rik	Mus musculus RIKEN cDNA 2010011I20 gene (2010011I20Rik), mRNA [NM_025912]	NM_025912	3.19847	7.6e-11
Jmjd2b	Mus musculus jumonji domain containing 2B (Jmjd2b), mRNA [NM_172132]	NM_172132	3.19601	6.32e-11
Bcat1	Mus musculus branched chain aminotransferase 1, cytosolic (Bcat1), transcript variant 1, mRNA [NM_001024468]	NM_001024468	3.19465	1.35e-09
TC1632596	Unknown		3.19309	5.81e-11
2310035C23Rik	Mus musculus RIKEN cDNA 2310035C23 gene (2310035C23Rik), transcript variant 1, mRNA [NM_173187]	NM_173187	3.19201	1.69e-10
Slc16a1	Mus musculus solute carrier family 16 (monocarboxylic acid transporters), member 1 (Slc16a1), mRNA [NM_009196]	NM_009196	3.19177	6.06e-11
AK052021	Mus musculus 12 days embryo eyeball cDNA, RIKEN full-length enriched library, clone:D230036D05 product:unclassifiable, full insert sequence. [AK052021]	AK052021	3.19145	4.09e-10
C130057N11Rik	Mus musculus 16 days embryo head cDNA, RIKEN full-length enriched library, clone:C130057N11 product:unclassifiable, full insert sequence [AK048403]	AK048403	3.19127	2e-05
Il1rap	Mus musculus adult male corpora quadrigemina cDNA, RIKEN full-length enriched library, clone:B230304B05 product:interleukin 1 receptor accessory protein, full insert sequence [AK045686]	AK045686	3.18969	2.3e-06
AK080833	Mus musculus adult male corpora quadrigemina cDNA, RIKEN full-length enriched library, clone:B230341L21 product:unclassifiable, full insert sequence. [AK080833]	AK080833	3.18839	2.89e-06
Zfp3	Mus musculus zinc finger protein 3 (Zfp3), mRNA [NM_177565]	NM_177565	3.18832	1.65e-10
Mfap3	Mus musculus microfibrillar-associated protein 3 (Mfap3), transcript variant 1, mRNA [NM_145426]	NM_145426	3.188	5.91e-11
Phf20	Mus musculus PHD finger protein 20 (Phf20), mRNA [NM_172674]	BC060121	3.18744	6.87e-11
Cryge	Mus musculus crystallin, gamma E (Cryge), mRNA [NM_007777]	NM_007777	3.18719	2e-05
Dock5	Mus musculus 0 day neonate eyeball cDNA, RIKEN full-length enriched library, clone:E130320D18 product:hypothetical Src homology 3 (SH3) domain profile and Repeat in HS1/Cortactin containing protein, full insert sequence. [AK053909]	AK053909	3.18713	7.25e-10
Mkrn3	Mus musculus makorin, ring finger protein, 3 (Mkrn3), mRNA [NM_011746]	NM_011746	3.18694	2.39e-09
Inpp5b	Mus musculus inositol polyphosphate-5-phosphatase B (Inpp5b), nuclear gene encoding mitochondrial protein, mRNA [NM_008385]	NM_008385	3.18683	6.09e-11
2900052L18Rik	Mus musculus adult male spinal cord cDNA, RIKEN full-length enriched library, clone:A330069N23 product:hypothetical protein, full insert sequence. [AK162948]	AK162948	3.18561	4.01e-07
AK035714	Mus musculus adult male urinary bladder cDNA, RIKEN full-length enriched library, clone:9530095D08 product:unclassifiable, full insert sequence. [AK035714]	AK035714	3.18482	7.8e-07
Prdx3	Mus musculus peroxiredoxin 3 (Prdx3), nuclear gene encoding mitochondrial protein, mRNA [NM_007452]	NM_007452	3.18419	6.02e-11
Uchl5ip	Mus musculus UCHL5 interacting protein (Uchl5ip), transcript variant 2, mRNA [NM_207104]	NM_207104	3.18359	6.03e-11
Snhg11	Mus musculus small nucleolar RNA host gene 11 (non-protein coding) (Snhg11), mRNA [NM_175692]	NM_175692	3.18255	7.18e-09
Chd1	Mus musculus adult male testis cDNA, RIKEN full-length enriched library, clone:4930525N21 product:inferred: chromodomain helicase DNA binding protein 1, full insert sequence. [AK015896]	AK015896	3.18144	1.91e-10
Fam57b	Mus musculus adult male cerebellum cDNA, RIKEN full-length enriched library, clone:1520401A17 product:hypothetical Eukaryotic protein of unknown function DUF887/TRAM, LAG1 and CLN8 homology containing protein, full insert sequence. [AK131642]	BC093505	3.18014	2.01e-10
Fam84a	Mus musculus family with sequence similarity 84, member A (Fam84a), mRNA [NM_029007]	NM_029007	3.18014	6.27e-11
Erbb3	Mus musculus v-erb-b2 erythroblastic leukemia viral oncogene homolog 3 (avian), mRNA (cDNA clone IMAGE:4460595), partial cds. [BC049279]	XM_972868	3.17966	2.59e-09
AK044951	Mus musculus 9.5 days embryo parthenogenote cDNA, RIKEN full-length enriched library, clone:B130015H10 product:unclassifiable, full insert sequence [AK044951]	AK044951	3.17942	4.47e-10
Zfp281	Mus musculus zinc finger protein 281 (Zfp281), mRNA [NM_177643]	NM_177643	3.17609	6.45e-11
Tubb3	Mus musculus tubulin, beta 3 (Tubb3), mRNA [NM_023279]	NM_023279	3.17502	1.76e-24
Egln1	Mus musculus EGL nine homolog 1 (C. elegans) (Egln1), mRNA [NM_053207]	NM_053207	3.17317	4.31e-08
BQ444971	UI-M-ER0-bxp-c-17-0-UI.r1 NIH_BMAP_ER0 Mus musculus cDNA clone IMAGE:5711176 5', mRNA sequence [BQ444971]	BQ444971	3.17263	0.00261
Ccdc25	Mus musculus coiled-coil domain containing 25 (Ccdc25), mRNA [NM_145944]	NM_145944	3.16918	8.66e-11
Cyhr1	Mus musculus 10 days neonate skin cDNA, RIKEN full-length enriched library, clone:4732479H09 product:cysteine and histidine rich 1, full insert sequence. [AK028994]	AK028994	3.16797	9.87e-11
Ripk4	Mus musculus receptor-interacting serine-threonine kinase 4 (Ripk4), mRNA [NM_023663]	NM_023663	3.16773	1.95e-10
Zic1	Mus musculus zinc finger protein of the cerebellum 1 (Zic1), mRNA [NM_009573]	NM_009573	3.16772	1.13e-10
Aph1a	Mus musculus anterior pharynx defective 1a homolog (C. elegans) (Aph1a), transcript variant 1, mRNA [NM_146104]	NM_146104	3.16759	1.81e-10
Vapb	Mus musculus vesicle-associated membrane protein, associated protein B and C (Vapb), mRNA [NM_019806]	NM_019806	3.16655	9.9e-11
AK080472	Mus musculus 7 days neonate cerebellum cDNA, RIKEN full-length enriched library, clone:A730032I11 product:unclassifiable, full insert sequence. [AK080472]	AK080472	3.16626	8.68e-11
Caskin1	Mus musculus 17 days embryo head cDNA, RIKEN full-length enriched library, clone:3300002N10 product:CASK-INTERACTING PROTEIN 1 homolog [Rattus norvegicus], full insert sequence. [AK014376]	AK014376	3.16558	5.31e-08
AK083355	Mus musculus 2 days neonate thymus thymic cells cDNA, RIKEN full-length enriched library, clone:C920016N10 product:CAMP-DEPENDENT 3',5'-CYCLIC PHOSPHODIESTERASE 4D (EC 3.1.4.17) (DPDE3) homolog [Rattus norvegicus], full insert sequence. [AK083355]	AK083355	3.16349	4.19e-10
Grit	Mus musculus Rho GTPase-activating protein (Grit), mRNA [NM_177379]	NM_177379	3.16304	1.12e-10
Gspt2	Mus musculus G1 to S phase transition 2 (Gspt2), mRNA [NM_008179]	NM_008179	3.16289	8.68e-11
Eml5	Mus musculus echinoderm microtubule associated protein like 5, mRNA (cDNA clone IMAGE:5368750), with apparent retained intron. [BC030361]	XM_901317	3.1626	1.92e-09
St3gal5	Mus musculus ST3 beta-galactoside alpha-2,3-sialyltransferase 5 (St3gal5), transcript variant 2, mRNA [NM_011375]	NM_011375	3.15912	7.24e-11
Ncrna00086	Mus musculus 9 days embryo whole body cDNA, RIKEN full-length enriched library, clone:D030021L12 product:unclassifiable, full insert sequence [AK050814]	NM_183030	3.15757	7.82e-11
Ptgr1	Mus musculus prostaglandin reductase 1 (Ptgr1), mRNA [NM_025968]	NM_025968	3.15726	7.36e-11
4922501C03Rik	Mus musculus 16 days neonate thymus cDNA, RIKEN full-length enriched library, clone:A130062J15 product:unclassifiable, full insert sequence. [AK037916]	AK037916	3.15655	0.00043
Vps37d	Mus musculus vacuolar protein sorting 37D (yeast) (Vps37d), mRNA [NM_177574]	NM_177574	3.15607	1.55e-10
Serbp1	Mus musculus 9.5 days embryo parthenogenote cDNA, RIKEN full-length enriched library, clone:B130045C05 product:PAI-1 MRNA-BINDING PROTEIN homolog [Homo sapiens], full insert sequence. [AK045190]	AK045190	3.15577	6.93e-09
Slc41a1	Mus musculus solute carrier family 41, member 1 (Slc41a1), mRNA [NM_173865]	NM_173865	3.15553	9.26e-11
Tomm34	Mus musculus translocase of outer mitochondrial membrane 34 (Tomm34), nuclear gene encoding mitochondrial protein, mRNA [NM_025996]	NM_025996	3.15537	9.06e-11
Xpo1	Mus musculus 12 days embryo eyeball cDNA, RIKEN full-length enriched library, clone:D230016M02 product:unclassifiable, full insert sequence [AK142055]	AK142055	3.15422	9.08e-10
Mapre1	Mus musculus microtubule-associated protein, RP/EB family, member 1 (Mapre1), mRNA [NM_007896]	NM_007896	3.15315	7.57e-11
Dhx9	Mus musculus 2 days neonate thymus thymic cells cDNA, RIKEN full-length enriched library, clone:E430014G22 product:DEAH (Asp-Glu-Ala-His) box polypeptide 9, full insert sequence. [AK169735]	AK169735	3.15223	2.63e-10
Cyb5r1	Mus musculus cytochrome b5 reductase 1 (Cyb5r1), mRNA [NM_028057]	NM_028057	3.15173	1.18e-10
AK053240	Mus musculus 0 day neonate lung cDNA, RIKEN full-length enriched library, clone:E030048K18 product:unclassifiable, full insert sequence. [AK053240]	AK053240	3.15147	2e-05
Nap1l3	Mus musculus nucleosome assembly protein 1-like 3 (Nap1l3), mRNA [NM_138742]	NM_138742	3.15053	0.00068
TC1667542	Unknown		3.14725	0.00371
AK042729	Mus musculus 7 days neonate cerebellum cDNA, RIKEN full-length enriched library, clone:A730019L14 product:unclassifiable, full insert sequence [AK042729]	AK042729	3.14625	0.00021
Zfp280c	Mus musculus 10 days neonate cortex cDNA, RIKEN full-length enriched library, clone:A830093N14 product:unclassifiable, full insert sequence. [AK044137]	AK044137	3.14353	0.00196
5730507C01Rik	Mus musculus RIKEN cDNA 5730507C01 gene (5730507C01Rik), mRNA [NM_001033157]	NM_001033157	3.14221	1.58e-10
AJ290945	Mus musculus mRNA for a stretch regulated skeletal muscle protein (Usmg3 gene). [AJ290945]	AJ290945	3.14212	8.87e-11
Cebpg	Mus musculus CCAAT/enhancer binding protein (C/EBP), gamma (Cebpg), mRNA [NM_009884]	NM_009884	3.14184	9.95e-11
Inppl1	Mus musculus inositol polyphosphate phosphatase-like 1 (Inppl1), transcript variant 1, mRNA [NM_010567]	NM_010567	3.14139	8.41e-11
NAP045818-1	Unknown		3.14008	7.04e-07
Atad5	Mus musculus ATPase family, AAA domain containing 5 (Atad5), mRNA [NM_001029856]	NM_001029856	3.13985	2.07e-10
Utp23	Mus musculus UTP23, small subunit (SSU) processome component, homolog (yeast) (Utp23), mRNA [NM_030132]	AK134445	3.13938	1e-05
Ccdc69	Mus musculus coiled-coil domain containing 69 (Ccdc69), mRNA [NM_177471]	NM_177471	3.13871	5.4e-10
Acss1	Mus musculus acyl-CoA synthetase short-chain family member 1 (Acss1), nuclear gene encoding mitochondrial protein, mRNA [NM_080575]	NM_080575	3.13857	8.5e-11
Mycn	Mus musculus v-myc myelocytomatosis viral related oncogene, neuroblastoma derived (avian) (Mycn), mRNA [NM_008709]	NM_008709	3.13539	9.83e-11
Exoc1	Mus musculus exocyst complex component 1 (Exoc1), mRNA [NM_027270]	NM_027270	3.13524	8.73e-11
Hspb8	Mus musculus heat shock protein 8 (Hspb8), mRNA [NM_030704]	NM_030704	3.13485	3.1e-10
Gfra1	Mus musculus glial cell line derived neurotrophic factor family receptor alpha 1 (Gfra1), mRNA [NM_010279]	NM_010279	3.13411	4.35e-10
Tle2	Mus musculus transducin-like enhancer of split 2, homolog of Drosophila E(spl) (Tle2), mRNA [NM_019725]	NM_019725	3.13293	9.24e-11
Rnf144b	Mus musculus adult male hypothalamus cDNA, RIKEN full-length enriched library, clone:A230079H13 product:unclassifiable, full insert sequence [AK038964]	AK038964	3.13103	7.32e-10
Neo1	Mus musculus neogenin (Neo1), transcript variant 1, mRNA [NM_008684]	NM_008684	3.13052	9.15e-11
0610037P05Rik	Mus musculus RIKEN cDNA 0610037P05 gene (0610037P05Rik), mRNA [NM_025345]	NM_025345	3.13005	3.04e-08
Nudt11	Mus musculus nudix (nucleoside diphosphate linked moiety X)-type motif 11 (Nudt11), mRNA [NM_021431]	NM_021431	3.12998	1.58e-10
4930506M07Rik	Mus musculus RIKEN cDNA 4930506M07 gene (4930506M07Rik), transcript variant 2, mRNA [NM_175172]	NM_175172	3.12752	9.28e-11
Rhobtb3	Mus musculus Rho-related BTB domain containing 3 (Rhobtb3), mRNA [NM_028493]	NM_028493	3.12611	1.17e-10
Syt9	Mus musculus synaptotagmin IX (Syt9), mRNA [NM_021889]	NM_021889	3.12549	1.52e-10
Garnl3	Mus musculus 13 days embryo heart cDNA, RIKEN full-length enriched library, clone:D330021H01 product:unclassifiable, full insert sequence [AK084611]	AK084611	3.12266	9.8e-11
Grpel1	Mus musculus GrpE-like 1, mitochondrial (Grpel1), nuclear gene encoding mitochondrial protein, mRNA [NM_024478]	NM_024478	3.12224	2.99e-06
Slc18a2	Mus musculus solute carrier family 18 (vesicular monoamine), member 2 (Slc18a2), mRNA [NM_172523]	NM_172523	3.12127	3e-05
AK143589	Mus musculus 6 days neonate spleen cDNA, RIKEN full-length enriched library, clone:F420011D22 product:zinc finger, FYVE domain containing 27, full insert sequence. [AK143589]	AK048822	3.12007	2.61e-07
LOC100047539	PREDICTED: Mus musculus similar to SEC15 homolog (LOC100047539), mRNA [XM_001478369]	XM_974947	3.12005	1e-10
Peo1	Mus musculus progressive external ophthalmoplegia 1 (human) (Peo1), mRNA [NM_153796]	NM_153796	3.11993	2.15e-10
Maged2	Mus musculus melanoma antigen, family D, 2 (Maged2), mRNA [NM_030700]	NM_030700	3.11739	9.98e-11
Dstyk	Mus musculus dual serine/threonine and tyrosine protein kinase (Dstyk), mRNA [NM_172516]	NM_172516	3.11692	4.3e-10
Prr12	Mus musculus proline rich 12 (Prr12), mRNA [NM_175022]	BC025846	3.11631	1.61e-10
TC1668615	YB1E_SCHPO (P87179) Serine-rich protein C30B4.01c precursor, partial (26%) [TC1668615]		3.11562	0.00114
Adipor1	Mus musculus adiponectin receptor 1 (Adipor1), mRNA [NM_028320]	NM_028320	3.11556	1.03e-10
Glce	Mus musculus glucuronyl C5-epimerase (Glce), mRNA [NM_033320]	NM_033320	3.11473	0.00011
Mak10	Mus musculus 9 days embryo whole body cDNA, RIKEN full-length enriched library, clone:D030020M24 product:CORNEAL WOUND HEALING RELATED PROTEIN homolog [Rattus norvegicus], full insert sequence [AK050805]	AK050805	3.11472	3.2e-10
Mov10l1	Mus musculus Moloney leukemia virus 10-like 1 (Mov10l1), mRNA [NM_031260]	NM_031260	3.11452	1.04e-10
Cdo1	Mus musculus cysteine dioxygenase 1, cytosolic (Cdo1), mRNA [NM_033037]	NM_033037	3.11133	1.27e-10
Tsx	Mus musculus testis specific X-linked gene (Tsx), mRNA [NM_009440]	NM_009440	3.11079	1.09e-10
Sugt1	Mus musculus 12 days embryo spinal cord cDNA, RIKEN full-length enriched library, clone:C530010F03 product:SGT1, suppressor of G2 allele of SKP1 (S. cerevisiae), full insert sequence [AK141416]	AK141416	3.10911	1.7e-10
Gstm2	Mus musculus glutathione S-transferase, mu 2 (Gstm2), mRNA [NM_008183]	NM_008183	3.10778	1.07e-10
Nr5a1	Mus musculus nuclear receptor subfamily 5, group A, member 1 (Nr5a1), mRNA [NM_139051]	NM_139051	3.10738	2.67e-10
Mdh1	Mus musculus 8 days embryo whole body cDNA, RIKEN full-length enriched library, clone:5730556L21 product:unclassifiable, full insert sequence [AK077724]	AK077724	3.10726	4e-05
Azgp1	Mus musculus alpha-2-glycoprotein 1, zinc (Azgp1), mRNA [NM_013478]	NM_013478	3.10686	0.00502
Mid1	Mus musculus clone MEX2B-9 Mid1 mRNA, partial sequence. [AY540038]	AY540038	3.10522	4e-05
Tarsl2	Mus musculus threonyl-tRNA synthetase-like 2 (Tarsl2), mRNA [NM_172310]	NM_172310	3.10257	2.12e-09
Dpysl5	Mus musculus dihydropyrimidinase-like 5 (Dpysl5), mRNA [NM_023047]	NM_023047	3.10047	6.64e-08
Cep78	Mus musculus centrosomal protein 78 (Cep78), mRNA [NM_198019]	NM_198019	3.09797	5.37e-10
Zfp462	Mus musculus zinc finger protein 462 (Zfp462), mRNA [NM_172867]	AK173266	3.0969	1.26e-10
Zic1	Mus musculus zinc finger protein of the cerebellum 1 (Zic1), mRNA [NM_009573]	NM_009573	3.09638	2.09e-10
Snx21	Mus musculus sorting nexin family member 21 (Snx21), mRNA [NM_133924]	AK141663	3.09628	1.19e-10
TC1682954	ENPL_MOUSE (P08113) Endoplasmin precursor (Heat shock protein 90 kDa beta member 1) (94 kDa glucose-regulated protein) (GRP94) (ERP99) (Polymorphic tumor rejection antigen 1) (Tumor rejection antigen gp96), partial (22%) [TC1682954]		3.09623	1.21e-10
Slc46a1	Mus musculus solute carrier family 46, member 1 (Slc46a1), mRNA [NM_026740]	NM_026740	3.09597	1.24e-10
Rps6ka6	Mus musculus ribosomal protein S6 kinase polypeptide 6 (Rps6ka6), mRNA [NM_025949]	NM_025949	3.09527	4.05e-06
Zfp280b	Mus musculus zinc finger protein 280b (Zfp280b), mRNA [NM_177475]	NM_177475	3.09443	1.35e-10
Rtn4ip1	Mus musculus reticulon 4 interacting protein 1 (Rtn4ip1), nuclear gene encoding mitochondrial protein, mRNA [NM_130892]	NM_130892	3.09347	2e-10
Unc119	Mus musculus unc-119 homolog (C. elegans) (Unc119), mRNA [NM_011676]	NM_011676	3.09158	1.22e-10
Irgq	Mus musculus immunity-related GTPase family, Q (Irgq), mRNA [NM_153134]	NM_153134	3.09131	2.08e-10
Sbk1	Mus musculus SH3-binding kinase 1 (Sbk1), mRNA [NM_145587]	NM_145587	3.09127	1.34e-10
Vps26b	Mus musculus vacuolar protein sorting 26 homolog B (yeast) (Vps26b), mRNA [NM_178027]	NM_178027	3.09019	1.38e-10
Macf1	Mus musculus microtubule-actin crosslinking factor 1 (Macf1), mRNA [NM_009600]	AF150755	3.08893	1.27e-10
Ccbe1	Mus musculus collagen and calcium binding EGF domains 1 (Ccbe1), mRNA [NM_178793]	BC103803	3.08891	1.08e-08
Lass6	Mus musculus adult male colon cDNA, RIKEN full-length enriched library, clone:9030601N10 product:unclassifiable, full insert sequence [AK136463]	AK136463	3.08815	1.26e-10
Fam110c	Mus musculus family with sequence similarity 110, member C (Fam110c), mRNA [NM_027828]	NM_027828	3.08797	7.67e-09
Ankra2	Mus musculus ankyrin repeat, family A (RFXANK-like), 2 (Ankra2), mRNA [NM_023472]	NM_023472	3.08662	1.31e-10
Osbpl11	Mus musculus oxysterol binding protein-like 11 (Osbpl11), mRNA [NM_176840]	NM_176840	3.08458	1.46e-10
Bahd1	Mus musculus bromo adjacent homology domain containing 1 (Bahd1), mRNA [NM_001045523]	BC100358	3.08362	1.49e-10
Acsl4	Mus musculus acyl-CoA synthetase long-chain family member 4 (Acsl4), transcript variant 1, mRNA [NM_207625]	NM_207625	3.08357	1.32e-10
Mcoln1	Mus musculus adult male stomach cDNA, RIKEN full-length enriched library, clone:2210015I05 product:unclassifiable, full insert sequence. [AK008732]	AK008732	3.08328	5.28e-09
Anapc1	Mus musculus nullipotent stem cell CRL-2070 NE cDNA, RIKEN full-length enriched library, clone:G431003J08 product:meiotic check point regulator, full insert sequence [AK090134]	AK090134	3.08273	1.85e-10
Hfe	Mus musculus partial mRNA for hemochromatosis protein (Hfe gene), 3' UTR long form [AJ306425]	AJ306425	3.08272	7.06e-10
BC066107	Mus musculus cDNA sequence BC066107 (BC066107), mRNA [NM_207245]	NM_207245	3.08133	4.61e-07
Tesc	Mus musculus tescalcin (Tesc), mRNA [NM_021344]	NM_021344	3.08105	1.44e-10
Akap5	Mus musculus A kinase (PRKA) anchor protein 5 (Akap5), mRNA [NM_001101471]	AK014386	3.08037	7e-05
Hadha	Mus musculus adult male urinary bladder cDNA, RIKEN full-length enriched library, clone:9530014F03 product:unclassifiable, full insert sequence. [AK035316]	AK035316	3.0798	0.00057
P4ha1	Mus musculus procollagen-proline, 2-oxoglutarate 4-dioxygenase (proline 4-hydroxylase), alpha 1 polypeptide (P4ha1), mRNA [NM_011030]	NM_011030	3.07935	1.93e-10
Cldn12	Mus musculus claudin 12 (Cldn12), mRNA [NM_022890]	NM_022890	3.07852	3.87e-10
AK034071	Mus musculus adult male diencephalon cDNA, RIKEN full-length enriched library, clone:9330154C14 product:unclassifiable, full insert sequence [AK034071]	AK034071	3.07772	2.44e-07
Uba5	Mus musculus adult male diencephalon cDNA, RIKEN full-length enriched library, clone:9330171K14 product:unclassifiable, full insert sequence [AK034280]	AK034280	3.07615	4.21e-09
Rrm2b	Mus musculus ribonucleotide reductase M2 B (TP53 inducible) (Rrm2b), mRNA [NM_199476]	NM_199476	3.07462	0.00095
Prkd1	Mus musculus protein kinase D1 (Prkd1), mRNA [NM_008858]	NM_008858	3.07412	1.67e-10
Scand3	Mus musculus SCAN domain containing 3 (Scand3), mRNA [NM_183088]	NM_183088	3.07342	1.47e-10
Glt25d1	Mus musculus glycosyltransferase 25 domain containing 1 (Glt25d1), mRNA [NM_146211]	NM_146211	3.07268	1.42e-10
TC1608317	BRD7_MOUSE (O88665) Bromodomain-containing protein 7 (75 kDa bromodomain protein), partial (23%) [TC1608317]		3.07237	4.52e-08
Gpkow	Mus musculus G patch domain and KOW motifs (Gpkow), mRNA [NM_173747]	NM_173747	3.07195	2.2e-10
Tpk1	Mus musculus thiamine pyrophosphokinase (Tpk1), mRNA [NM_013861]	NM_013861	3.07143	0.00218
Zfp108	Mus musculus zinc finger protein 108 (Zfp108), mRNA [NM_018791]	BC100339	3.07066	2.94e-09
Pus1	Mus musculus pseudouridine synthase 1 (Pus1), transcript variant 2, mRNA [NM_019700]	NM_019700	3.07039	1.54e-09
Faf2	Mus musculus Fas associated factor family member 2 (Faf2), mRNA [NM_178397]	NM_178397	3.06957	1.53e-10
Wdr21	Mus musculus WD repeat domain 21 (Wdr21), mRNA [NM_030246]	NM_030246	3.06796	1.51e-10
Ciao1	Mus musculus cytosolic iron-sulfur protein assembly 1 homolog (S. cerevisiae) (Ciao1), mRNA [NM_025296]	NM_025296	3.06721	2.76e-08
5430407P10Rik	Mus musculus RIKEN cDNA 5430407P10 gene (5430407P10Rik), mRNA [NM_144883]	NM_144883	3.06599	3.59e-10
NAP050610-1	Unknown		3.0653	1.85e-06
AI646023	Mus musculus expressed sequence AI646023 (AI646023), mRNA [NM_198860]	NM_198860	3.06421	2.1e-10
Sh3bp5	Mus musculus SH3-domain binding protein 5 (BTK-associated) (Sh3bp5), mRNA [NM_011894]	NM_011894	3.06383	1.53e-10
Smc5	Mus musculus structural maintenance of chromosomes 5, mRNA (cDNA clone MGC:7569 IMAGE:3493165), complete cds. [BC007174]	BC007174	3.06348	2.13e-08
BB268102	BB268102 RIKEN full-length enriched, 10 days neonate cortex Mus musculus cDNA clone A830033I18 3'. [BB268102]		3.06245	1.68e-06
5730601F06Rik	Mus musculus 16 days embryo head cDNA, RIKEN full-length enriched library, clone:C130077H22 product:hypothetical protein, full insert sequence. [AK081787]	AK081787	3.06129	2.93e-10
Setd8	Mus musculus SET domain containing (lysine methyltransferase) 8 (Setd8), mRNA [NM_030241]	NM_030241	3.05801	1.62e-10
Xpo4	exportin 4 Gene [Source:MGI Symbol;Acc:MGI:1888526] [ENSMUST00000089482]	AK129430	3.0575	1.56e-09
Slc16a6	Mus musculus solute carrier family 16 (monocarboxylic acid transporters), member 6 (Slc16a6), transcript variant 1, mRNA [NM_001029842]	NM_001029842	3.0571	1.99e-08
Myst2	Mus musculus 12 days embryo female mullerian duct includes surrounding region cDNA, RIKEN full-length enriched library, clone:6820409K03 product:unclassifiable, full insert sequence. [AK078483]	AK078483	3.05666	3.05e-06
A130038J17Rik	Mus musculus 16 days neonate thymus cDNA, RIKEN full-length enriched library, clone:A130082E16 product:unclassifiable, full insert sequence. [AK038150]	AK038150	3.05649	1.43e-07
Atrx	Mus musculus 0 day neonate head cDNA, RIKEN full-length enriched library, clone:4833408C14 product:unclassifiable, full insert sequence. [AK014663]	AK014663	3.05506	1.08e-06
Tcfap4	Mus musculus transcription factor AP4 (Tcfap4), mRNA [NM_031182]	NM_031182	3.05492	9.08e-10
Mmp9	Mus musculus matrix metallopeptidase 9 (Mmp9), mRNA [NM_013599]	NM_013599	3.05389	4.02e-07
Eif1ay	Mus musculus adult male diencephalon cDNA, RIKEN full-length enriched library, clone:9330022L20 product:eukaryotic translation initiation factor 1A, Y-linked, full insert sequence [AK136814]	NM_025437	3.05385	6.69e-10
DV069243	UGS01_20_K17.x1 FH UGS01 Mus musculus cDNA clone UGS01_20_K17 similar to Anaphase promoting complex subunit 1, mRNA sequence [DV069243]	AK053383	3.05383	2.4e-10
Dnmbp	Mus musculus dynamin binding protein (Dnmbp), mRNA [NM_028029]	NM_028029	3.05373	4.31e-08
Jhdm1d	Mus musculus jumonji C domain-containing histone demethylase 1 homolog D (S. cerevisiae) (Jhdm1d), mRNA [NM_001033430]	NM_001033430	3.05323	1.77e-10
Zfp26	Mus musculus zinc finger protein 26 (Zfp26), mRNA [NM_011753]	AK083426	3.05264	0.00349
Lmo4	Mus musculus 15 days embryo male testis cDNA, RIKEN full-length enriched library, clone:8030411F07 product:LIM only 4, full insert sequence [AK033097]	AK033097	3.05173	1.95e-10
Znrf3	Mus musculus zinc and ring finger 3 (Znrf3), mRNA [NM_001080924]	XM_893176	3.05169	1.11e-09
Fam175a	Mus musculus 6 days embryo whole body cDNA, RIKEN full-length enriched library, clone:5630400M01 product:hypothetical protein, full insert sequence. [AK017468]	AK017468	3.04962	7.2e-10
Tmem201	Mus musculus transmembrane protein 201 (Tmem201), transcript variant 2, mRNA [NM_177672]	NM_177672	3.04961	7.23e-10
AK052617	Mus musculus 0 day neonate kidney cDNA, RIKEN full-length enriched library, clone:D630006C15 product:unclassifiable, full insert sequence. [AK052617]	AK052617	3.04806	2.81e-10
Mobkl1a	Mus musculus adult male corpora quadrigemina cDNA, RIKEN full-length enriched library, clone:B230306A03 product:unclassifiable, full insert sequence [AK045695]	AK045695	3.04798	3.54e-08
NAP014312-001	Unknown		3.04736	1.86e-10
AK039844	Mus musculus 0 day neonate thymus cDNA, RIKEN full-length enriched library, clone:A430018I09 product:unclassifiable, full insert sequence. [AK039844]	AK039844	3.04611	0.00513
Six6os1	Mus musculus Six6 opposite strand transcript 1 (Six6os1), mRNA [NM_029444]	NM_029444	3.04563	1.95e-10
2900056M20Rik	PREDICTED: Mus musculus RIKEN cDNA 2900056M20 gene (2900056M20Rik), mRNA [XM_898625]	XM_898625	3.04525	1.63e-08
Dlgap1	Mus musculus discs, large (Drosophila) homolog-associated protein 1 (Dlgap1), transcript variant 1, mRNA [NM_177639]	NM_177639	3.04274	1.78e-09
Zfp410	Mus musculus zinc finger protein 410 (Zfp410), mRNA [NM_144833]	NM_144833	3.04204	1.92e-10
Zfp839	Mus musculus zinc finger protein 839, mRNA (cDNA clone MGC:183643 IMAGE:9087643), complete cds [BC150732]	XM_138271	3.04058	1.9e-07
Pet2	Mus musculus plasmacytoma expressed transcript 2 (Pet2), mRNA [NM_008821]	NM_008821	3.03911	5.71e-10
Mex3a	Mus musculus mex3 homolog A (C. elegans) (Mex3a), mRNA [NM_001029890]	NM_001029890	3.03847	2.08e-10
Cdca8	Mus musculus 13 days embryo male testis cDNA, RIKEN full-length enriched library, clone:6030454J20 product:hypothetical protein, full insert sequence [AK031571]	AK031571	3.03821	3.95e-07
Diap2	Mus musculus diaphanous homolog 2 (Drosophila) (Diap2), transcript variant 1, mRNA [NM_017398]	NM_017398	3.03819	2.86e-10
3010003L21Rik	Mus musculus cDNA clone IMAGE:6334265. [BC106181]	BC106181	3.03646	3.24e-10
Cdyl	Mus musculus chromodomain protein, Y chromosome-like (Cdyl), transcript variant 1, mRNA [NM_009881]	NM_009881	3.03593	2.64e-10
Ahctf1	Mus musculus AT hook containing transcription factor 1 (Ahctf1), mRNA [NM_026375]	BC023122	3.03571	1.16e-09
2012-09-09	Mus musculus septin 9 (Sept9), transcript variant 4, mRNA [NM_017380]	NM_017380	3.03384	1.94e-10
Svs5	Mus musculus seminal vesicle secretory protein 5 (Svs5), mRNA [NM_009301]	NM_009301	3.03329	1.98e-10
Polr3d	Mus musculus polymerase (RNA) III (DNA directed) polypeptide D (Polr3d), mRNA [NM_025945]	NM_025945	3.03202	2.06e-10
AK053800	Mus musculus 0 day neonate eyeball cDNA, RIKEN full-length enriched library, clone:E130309C02 product:RIKEN cDNA 2310079F23 gene, full insert sequence. [AK053800]	AK053800	3.03175	4.82e-08
Gca	Mus musculus grancalcin (Gca), mRNA [NM_145523]	NM_145523	3.03167	2.36e-10
Rragd	Mus musculus Ras-related GTP binding D (Rragd), mRNA [NM_027491]	NM_027491	3.03161	2.84e-10
Cbx4	Mus musculus chromobox homolog 4 (Drosophila Pc class) (Cbx4), mRNA [NM_007625]	NM_007625	3.0311	1.98e-10
A930041I02Rik	Mus musculus RIKEN cDNA A930041I02 gene (A930041I02Rik), mRNA [NM_178778]	NM_178778	3.03108	2.4e-09
Exod1	Mus musculus exonuclease domain containing 1 (Exod1), mRNA [NM_027698]	NM_027698	3.03104	2.83e-10
Rnf160	Mus musculus ring finger protein 160 (Rnf160), mRNA [NM_001081068]	XM_128374	3.03036	6.67e-07
Gnai1	Mus musculus guanine nucleotide binding protein (G protein), alpha inhibiting 1 (Gnai1), mRNA [NM_010305]	NM_010305	3.03016	2.33e-10
Rprd1a	Mus musculus regulation of nuclear pre-mRNA domain containing 1A (Rprd1a), mRNA [NM_144861]	NM_144861	3.03015	2.89e-10
Mtrf1l	Mus musculus mitochondrial translational release factor 1-like (Mtrf1l), nuclear gene encoding mitochondrial protein, mRNA [NM_175374]	NM_175374	3.02954	2.09e-10
Kbtbd8	Mus musculus kelch repeat and BTB (POZ) domain containing 8 (Kbtbd8), transcript variant 1, mRNA [NM_001008785]	NM_001008785	3.0283	1.54e-08
Dgkk	Mus musculus diacylglycerol kinase kappa (Dgkk), mRNA [NM_177914]	AK081332	3.0267	5.68e-08
Wdr59	Mus musculus mRNA for mKIAA1923 protein. [AK173301]	BC066082	3.02598	2.17e-09
Trim7	Mus musculus tripartite motif-containing 7 (Trim7), mRNA [NM_053166]	AF396656	3.025	2.4e-09
Gpd1	Mus musculus glycerol-3-phosphate dehydrogenase 1 (soluble) (Gpd1), mRNA [NM_010271]	NM_010271	3.02392	1.11e-06
Atad2b	Mus musculus ATPase family, AAA domain containing 2B (Atad2b), mRNA [NM_001099628]	AK220160	3.02345	3.97e-10
Elac1	Mus musculus elaC homolog 1 (E. coli) (Elac1), mRNA [NM_053255]	NM_053255	3.02285	2.59e-08
Cyp2d22	Mus musculus 15 days embryo head cDNA, RIKEN full-length enriched library, clone:D930036L18 product:cytochrome P450, family 2, subfamily d, polypeptide 22, full insert sequence. [AK086555]	AK086555	3.02206	4.37e-07
Dppa4	Mus musculus developmental pluripotency associated 4 (Dppa4), transcript variant 1, mRNA [NM_028610]	NM_028610	3.02162	3.27e-10
Tbc1d4	Mus musculus TBC1 domain family, member 4 (Tbc1d4), mRNA [NM_001081278]	XM_884420	3.02152	4.74e-10
Tspan17	Mus musculus tetraspanin 17 (Tspan17), mRNA [NM_028841]	NM_028841	3.01996	2.16e-10
Plod2	Mus musculus procollagen lysine, 2-oxoglutarate 5-dioxygenase 2 (Plod2), transcript variant 2, mRNA [NM_011961]	NM_011961	3.01962	2.63e-10
Adpgk	Mus musculus ADP-dependent glucokinase (Adpgk), mRNA [NM_028121]	NM_028121	3.01831	2.42e-10
TC1638255	Q8K0H2_MOUSE (Q8K0H2) Chpt1 protein, partial (18%) [TC1638255]		3.01792	2.67e-10
Shroom2	Mus musculus shroom family member 2 (Shroom2), mRNA [NM_172441]	AK049850	3.01565	3.36e-09
Slc38a5	Mus musculus solute carrier family 38, member 5 (Slc38a5), mRNA [NM_172479]	NM_172479	3.01556	2.24e-10
AK031607	Mus musculus 13 days embryo male testis cDNA, RIKEN full-length enriched library, clone:6030459M14 product:unclassifiable, full insert sequence. [AK031607]	AK031607	3.01536	5.36e-10
Wfdc2	Mus musculus WAP four-disulfide core domain 2 (Wfdc2), mRNA [NM_026323]	NM_026323	3.01445	5.44e-10
Pdzd2	Mus musculus PDZ domain containing 2 (Pdzd2), mRNA [NM_001081064]	XM_127972	3.0141	2.67e-10
Zfp238	Mus musculus zinc finger protein 238 (Zfp238), transcript variant 2, mRNA [NM_013915]	NM_013915	3.01307	2.3e-10
AK081376	Mus musculus 16 days embryo head cDNA, RIKEN full-length enriched library, clone:C130012D05 product:unclassifiable, full insert sequence [AK081376]	AK081376	3.0125	0.00016
AK044497	Mus musculus adult retina cDNA, RIKEN full-length enriched library, clone:A930016O12 product:similar to TATA BOX BINDING PROTEIN (TBP)-ASSOCIATED FACTOR, RNA POLYMERASE II, I, 28KD [Mus musculus], full insert sequence. [AK044497]	AK044497	3.01209	8e-05
Brwd1	Mus musculus bromodomain and WD repeat domain containing 1 (Brwd1), transcript variant 1, mRNA [NM_145125]	NM_145125	3.01076	2.38e-10
AK050851	Mus musculus 9 days embryo whole body cDNA, RIKEN full-length enriched library, clone:D030026B04 product:unclassifiable, full insert sequence. [AK050851]	AK050851	3.01058	0.00459
TC1620610	AF052147 cul-3 {Homo sapiens} (exp=-1; wgp=0; cg=0), partial (27%) [TC1620610]		3.00972	1.44e-08
Slc5a3	Mus musculus solute carrier family 5 (inositol transporters), member 3 (Slc5a3), mRNA [NM_017391]	AK133105	3.00893	3.37e-10
B4galnt1	Mus musculus beta-1,4-N-acetyl-galactosaminyl transferase 1 (B4galnt1), transcript variant 1, mRNA [NM_008080]	NM_008080	3.00871	2.47e-10
Sh3tc2	Mus musculus SH3 domain and tetratricopeptide repeats 2 (Sh3tc2), mRNA [NM_172628]	NM_172628	3.00704	2.65e-10
Nanos2	Mus musculus nanos homolog 2 (Drosophila) (Nanos2), mRNA [NM_194064]	NM_194064	3.00648	7e-05
AK083982	Mus musculus 12 days embryo spinal ganglion cDNA, RIKEN full-length enriched library, clone:D130071L03 product:unclassifiable, full insert sequence. [AK083982]	AK083982	3.00459	0.00037
Abcc1	Mus musculus ATP-binding cassette, sub-family C (CFTR/MRP), member 1 (Abcc1), mRNA [NM_008576]	NM_008576	3.0043	2.53e-10
Plekha7	Mus musculus pleckstrin homology domain containing, family A member 7 (Plekha7), mRNA [NM_172743]	NM_172743	3.00392	4.72e-08
Gabpb1	Mus musculus GA repeat binding protein, beta 1 (Gabpb1), transcript variant 1, mRNA [NM_207669]	NM_207669	3.00337	8.31e-10
Lcor	Mus musculus 2 days pregnant adult female ovary cDNA, RIKEN full-length enriched library, clone:E330009D23 product:unclassifiable, full insert sequence [AK054275]	AK054275	3.00286	4.04e-10
Usp37	Mus musculus 6 days neonate head cDNA, RIKEN full-length enriched library, clone:5430409E09 product:unclassifiable, full insert sequence [AK077383]	AK077383	3.00267	4.74e-10
Clstn1	Mus musculus calsyntenin 1, mRNA (cDNA clone MGC:54504 IMAGE:6315355), complete cds. [BC053843]	BC053843	3.00231	2.49e-10
Trrap	Mus musculus transformation/transcription domain-associated protein (Trrap), mRNA [NM_001081362]	BC008264	3.00217	2.5e-10
Ryk	Mus musculus receptor-like tyrosine kinase (Ryk), transcript variant 1, mRNA [NM_013649]	NM_013649	3.0005	2.66e-10
Clip3	Mus musculus CAP-GLY domain containing linker protein 3 (Clip3), mRNA [NM_001081114]	XM_133283	3.00047	2.67e-10
Ocrl	Mus musculus adult retina cDNA, RIKEN full-length enriched library, clone:A930015M15 product:unclassifiable, full insert sequence. [AK044488]	AK044488	3.00021	2.34e-07
Zfp60	Mus musculus zinc finger protein 60 (Zfp60), transcript variant 1, mRNA [NM_009560]	NM_009560	2.99953	0.0003
Dohh	Mus musculus 10 days neonate cortex cDNA, RIKEN full-length enriched library, clone:A830047P19 product:similar to R26529_1 [Homo sapiens], full insert sequence. [AK080664]	AK080664	2.99937	1.11e-09
Dlk1	Mus musculus delta-like 1 homolog (Drosophila) (Dlk1), mRNA [NM_010052]	NM_010052	2.99866	2.92e-10
Wnk1	Mus musculus mRNA for mKIAA0344 protein. [AK172935]	AK172935	2.99822	1.32e-06
Zxda	Mus musculus zinc finger, X-linked, duplicated A (Zxda), non-coding RNA [NR_003292]	XR_002152	2.99758	0.00125
Slc25a1	Mus musculus solute carrier family 25 (mitochondrial carrier, citrate transporter), member 1 (Slc25a1), nuclear gene encoding mitochondrial protein, mRNA [NM_153150]	NM_153150	2.99751	2.6e-10
Cited2	Mus musculus Cbp/p300-interacting transactivator, with Glu/Asp-rich carboxy-terminal domain, 2 (Cited2), mRNA [NM_010828]	NM_010828	2.99678	2.62e-10
Dag1	Mus musculus dystroglycan 1 (Dag1), mRNA [NM_010017]	NM_010017	2.99495	4.08e-10
Adprhl2	Mus musculus ADP-ribosylhydrolase like 2 (Adprhl2), mRNA [NM_133883]	NM_133883	2.9933	3.63e-10
AK079803	Mus musculus 0 day neonate thymus cDNA, RIKEN full-length enriched library, clone:A430073A01 product:unclassifiable, full insert sequence [AK079803]	AK079803	2.99262	4.07e-08
Jarid1c	Mus musculus jumonji, AT rich interactive domain 1C (Rbp2 like) (Jarid1c), mRNA [NM_013668]	AK081887	2.99199	3.14e-10
2410025L10Rik	Mus musculus RIKEN cDNA 2410025L10 gene (2410025L10Rik), transcript variant 2, mRNA [NM_028596]	NM_028596	2.99109	2.74e-10
Exoc1	Mus musculus 0 day neonate thymus cDNA, RIKEN full-length enriched library, clone:A430077I21 product:unclassifiable, full insert sequence. [AK040212]	AK040212	2.99063	1.17e-06
Marveld2	Mus musculus MARVEL (membrane-associating) domain containing 2 (Marveld2), transcript variant 1, mRNA [NM_001038602]	NM_178410	2.99024	5.31e-10
NAP071090-1	Unknown		2.99023	9.04e-10
Trim35	Mus musculus tripartite motif-containing 35 (Trim35), mRNA [NM_029979]	NM_029979	2.98994	2.84e-10
A130019N19	Unknown		2.98974	4.72e-10
Magea5	Mus musculus melanoma antigen, family A, 5 (Magea5), mRNA [NM_020018]	NM_020018	2.98733	1.43e-09
Itsn2	Mus musculus 16 days neonate thymus cDNA, RIKEN full-length enriched library, clone:A130080B19 product:protein phosphatase 1, regulatory (inhibitor) subunit 7, full insert sequence. [AK038116]	AK038116	2.98696	2.98e-07
Golga7	Mus musculus activated spleen cDNA, RIKEN full-length enriched library, clone:F830033L24 product:hypothetical protein, MNCb-1213, full insert sequence. [AK089856]	AK089856	2.98643	2.81e-09
Rbm39	Mus musculus transcription coactivator CAPER (Caper) mRNA, complete cds. [AY061882]	NM_133242	2.98634	2.84e-10
Gtdc1	Mus musculus 13 days embryo heart cDNA, RIKEN full-length enriched library, clone:D330050H21 product:hypothetical protein, full insert sequence [AK084833]	AK084833	2.98335	7e-05
C230021P08Rik	Mus musculus Riken cDNA C230021P08 gene (C230021P08Rik), mRNA [NM_001001884]	NM_001001884	2.98325	4.75e-10
Fbxw2	Mus musculus F-box and WD-40 domain protein 2, mRNA (cDNA clone MGC:6266 IMAGE:3601733), complete cds. [BC003834]	BC003834	2.98312	2e-05
Cbx8	Mus musculus 12 days embryo eyeball cDNA, RIKEN full-length enriched library, clone:D230017K24 product:chromobox homolog 8 (Drosophila Pc class), full insert sequence. [AK051905]	AK051905	2.98302	6e-10
Ncor2	Mus musculus nuclear receptor co-repressor 2 (Ncor2), mRNA [NM_011424]	NM_011424	2.9823	2.94e-10
Sgpp1	Mus musculus sphingosine-1-phosphate phosphatase 1 (Sgpp1), mRNA [NM_030750]	NM_030750	2.98205	3.16e-10
Pitrm1	Mus musculus pitrilysin metallepetidase 1 (Pitrm1), mRNA [NM_145131]	NM_145131	2.9808	3.03e-10
Actr3b	Mus musculus ARP3 actin-related protein 3 homolog B (yeast) (Actr3b), mRNA [NM_001004365]	NM_001004365	2.97924	0.00027
Rasd1	Mus musculus RAS, dexamethasone-induced 1 (Rasd1), mRNA [NM_009026]	NM_009026	2.97803	3.16e-10
Hmgxb4	Mus musculus HMG box domain containing 4 (Hmgxb4), mRNA [NM_178017]	NM_178017	2.97773	7.7e-10
AK083356	Mus musculus 2 days neonate thymus thymic cells cDNA, RIKEN full-length enriched library, clone:C920018C12 product:unclassifiable, full insert sequence. [AK083356]	AK083356	2.97766	4.07e-08
Tgfbrap1	Mus musculus 12 days embryo spinal ganglion cDNA, RIKEN full-length enriched library, clone:D130035M05 product:hypothetical Prenyl group binding site (CAAX box) containing protein, full insert sequence. [AK051333]	AK051333	2.97678	6.28e-07
Six6os1	Mus musculus Six6 opposite strand transcript 1 (Six6os1), mRNA [NM_029444]	NM_029444	2.97549	6.06e-10
Efna2	Mus musculus ephrin A2 (Efna2), mRNA [NM_007909]	NM_007909	2.9742	0.00042
Trp53bp2	Mus musculus transformation related protein 53 binding protein 2 (Trp53bp2), mRNA [NM_173378]	NM_173378	2.97255	4.45e-10
Sdc4	Mus musculus syndecan 4 (Sdc4), mRNA [NM_011521]	NM_011521	2.97073	3.5e-10
LOC552903	Mus musculus 0 day neonate cerebellum cDNA, RIKEN full-length enriched library, clone:C230031J15 product:unclassifiable, full insert sequence. [AK082274]	AK082274	2.97018	1.57e-08
Klhl23	Mus musculus kelch-like 23 (Drosophila) (Klhl23), mRNA [NM_177784]	NM_177784	2.96998	2.78e-09
AK044912	Mus musculus 9.5 days embryo parthenogenote cDNA, RIKEN full-length enriched library, clone:B130011F20 product:unclassifiable, full insert sequence. [AK044912]	AK044912	2.96931	0.00046
Plce1	Mus musculus adult male urinary bladder cDNA, RIKEN full-length enriched library, clone:9530064F18 product:PANCREAS-ENRICHED PHOSPHOLIPASE C homolog [Homo sapiens], full insert sequence. [AK035546]	AK035546	2.96927	2.33e-08
Lzts2	Mus musculus leucine zipper, putative tumor suppressor 2 (Lzts2), transcript variant 1, mRNA [NM_145503]	NM_145503	2.96664	3.35e-10
Slc22a17	Mus musculus solute carrier family 22 (organic cation transporter), member 17 (Slc22a17), mRNA [NM_021551]	NM_021551	2.96639	3.74e-10
Sos1	Mus musculus Son of sevenless homolog 1 (Drosophila) (Sos1), mRNA [NM_009231]	AK047849	2.96556	0.00152
AK085838	Mus musculus 16 days neonate heart cDNA, RIKEN full-length enriched library, clone:D830015M12 product:unclassifiable, full insert sequence. [AK085838]	AK085838	2.96476	2.67e-06
Sft2d3	PREDICTED: Mus musculus SFT2 domain containing 3 (Sft2d3), mRNA [XM_484715]	XM_484715	2.96467	2e-05
Egln1	Mus musculus EGL nine homolog 1 (C. elegans) (Egln1), mRNA [NM_053207]	NM_053207	2.96437	3.86e-10
Exoc3l2	Mus musculus adult male testis cDNA, RIKEN full-length enriched library, clone:4933417E01 product:hypothetical protein, full insert sequence [AK016842]	NM_028954	2.9633	3.46e-10
A_51_P507637	Unknown		2.96217	1.51e-07
CN716893	Mus musculus expressed sequence CN716893 (CN716893), mRNA [NM_001033492]	NM_001033492	2.96153	3.5e-10
Plekhh1	Mus musculus mRNA for mKIAA1200 protein. [AK122464]	AK052692	2.96152	0.00871
AK031051	Mus musculus adult male thymus cDNA, RIKEN full-length enriched library, clone:5832443G15 product:unclassifiable, full insert sequence. [AK031051]	AK031051	2.96133	0.00401
Arf3	Mus musculus ADP-ribosylation factor 3 (Arf3), mRNA [NM_007478]	NM_007478	2.96131	3.5e-10
Mrpl17	Mus musculus mitochondrial ribosomal protein L17 (Mrpl17), nuclear gene encoding mitochondrial protein, mRNA [NM_025301]	NM_025301	2.95992	1e-05
Calcoco1	Mus musculus calcium binding and coiled coil domain 1 (Calcoco1), mRNA [NM_026192]	NM_026192	2.9597	6.05e-10
Arhgef16	Mus musculus Rho guanine nucleotide exchange factor (GEF) 16 (Arhgef16), mRNA [NM_001112744]	BC044805	2.95932	4.34e-09
Gadd45a	Mus musculus growth arrest and DNA-damage-inducible 45 alpha (Gadd45a), mRNA [NM_007836]	NM_007836	2.95823	3.88e-10
Sgpl1	Mus musculus sphingosine phosphate lyase 1 (Sgpl1), mRNA [NM_009163]	NM_009163	2.95722	3.64e-10
Arid4a	Mus musculus 0 day neonate lung cDNA, RIKEN full-length enriched library, clone:E030049C01 product:unclassifiable, full insert sequence. [AK087354]	AK087354	2.95705	3.07e-09
EG328644	Mus musculus predicted gene, EG328644 (EG328644), mRNA [NM_198629]	NM_198629	2.95703	6.06e-06
Dact2	Mus musculus dapper homolog 2, antagonist of beta-catenin (xenopus) (Dact2), mRNA [NM_172826]	NM_172826	2.95682	8.96e-10
Add3	Mus musculus adducin 3 (gamma) (Add3), mRNA [NM_013758]	NM_013758	2.95598	3.71e-10
A_51_P444015	Unknown		2.95497	3.5e-09
Fbxw8	Mus musculus F-box and WD-40 domain protein 8 (Fbxw8), mRNA [NM_172721]	NM_172721	2.95445	7.51e-10
Sema6c	Mus musculus sema domain, transmembrane domain (TM), and cytoplasmic domain, (semaphorin) 6C (Sema6c), mRNA [NM_011351]	NM_011351	2.95387	7.65e-10
Pim2	Mus musculus proviral integration site 2 (Pim2), mRNA [NM_138606]	NM_138606	2.95348	1.13e-08
Tshz1	Mus musculus teashirt zinc finger family member 1 (Tshz1), mRNA [NM_001081300]	BC058264	2.95334	1.37e-09
Mpzl1	Mus musculus myelin protein zero-like 1 (Mpzl1), transcript variant 2, mRNA [NM_001001880]	NM_001001880	2.95272	3.76e-10
5430411K18Rik	PREDICTED: Mus musculus RIKEN cDNA 5430411K18 gene (5430411K18Rik), mRNA [XM_973419]	XM_973419	2.95205	4.06e-10
Tubg2	Mus musculus tubulin, gamma 2 (Tubg2), mRNA [NM_134028]	NM_134028	2.95146	1.99e-09
NAP028353-1	Unknown	XM_620995	2.95042	4.36e-06
Pdia5	Mus musculus protein disulfide isomerase associated 5 (Pdia5), mRNA [NM_028295]	NM_028295	2.94989	3.89e-10
Tmem143	Mus musculus transmembrane protein 143 (Tmem143), mRNA [NM_144801]	NM_144801	2.94943	4.84e-08
Lonrf3	Mus musculus LON peptidase N-terminal domain and ring finger 3 (Lonrf3), mRNA [NM_028894]	NM_028894	2.94845	3.91e-10
TC1614642	Q6GV29_RAT (Q6GV29) UDP-GlcNAc:betaGal beta-1,3-N-acetylglucosaminyltransferase-like 1, partial (31%) [TC1614642]		2.94821	8.43e-10
AK037786	Mus musculus 16 days neonate thymus cDNA, RIKEN full-length enriched library, clone:A130049M12 product:unclassifiable, full insert sequence. [AK037786]	AK037786	2.94792	5.79e-07
Shc2	Mus musculus src homology 2 domain-containing transforming protein C2 (Shc2), mRNA [NM_001024539]	BC059866	2.94632	1e-05
Tnpo3	Mus musculus 7 days embryo whole body cDNA, RIKEN full-length enriched library, clone:C430013M08 product:NUCLEAR TRANSPORT RECEPTOR homolog [Homo sapiens], full insert sequence. [AK049446]	AK049446	2.94517	0.00012
Actn3	Mus musculus actinin alpha 3 (Actn3), mRNA [NM_013456]	NM_013456	2.94474	5.34e-10
AK050998	Mus musculus 9 days embryo whole body cDNA, RIKEN full-length enriched library, clone:D030052H06 product:unclassifiable, full insert sequence. [AK050998]	AK050998	2.94473	0.00052
BI646741	BI646741 603279769F1 NCI_CGAP_Mam3 Mus musculus cDNA clone IMAGE:5320025 5', mRNA sequence [BI646741]	BI646741	2.94444	6.02e-10
Mllt6	Mus musculus myeloid/lymphoid or mixed-lineage leukemia (trithorax homolog, Drosophila); translocated to, 6 (Mllt6), mRNA [NM_139311]	XM_915937	2.94403	4.04e-10
BU558818	AGENCOURT_10337644 NIH_MGC_144 Mus musculus cDNA clone IMAGE:6587403 5', mRNA sequence [BU558818]	AK133483	2.94368	1.51e-09
Sp5	Mus musculus trans-acting transcription factor 5 (Sp5), mRNA [NM_022435]	NM_022435	2.94295	2.06e-07
Klhdc2	Mus musculus 12 days embryo male wolffian duct includes surrounding region cDNA, RIKEN full-length enriched library, clone:6720428K09 product:HOST CELL FACTOR HOMOLOG LCP (CDNA FLJ10909 FIS, CLONE OVARC1000091, WEAKLY SIMILAR TO HOST CELL FACTOR C1) (HEPATOCELLULAR CARCINOMA- ASSOCIATED ANTIGEN 33) homolog [Homo sapiens], full insert sequence. [AK078408]	AK078408	2.9429	6.67e-10
Cytip	Mus musculus cytohesin 1 interacting protein (Cytip), mRNA [NM_139200]	NM_139200	2.94288	4.26e-10
Jam2	Mus musculus 10 days neonate skin cDNA, RIKEN full-length enriched library, clone:4732454B13 product:junction cell adhesion molecule 2, full insert sequence [AK028757]	NM_023844	2.94266	5.51e-09
Perld1	Mus musculus per1-like domain containing 1 (Perld1), mRNA [NM_001033537]	NM_001033537	2.94251	4.59e-10
Hars	Mus musculus 8 days embryo whole body cDNA, RIKEN full-length enriched library, clone:5730408P20 product:histidyl tRNA synthetase, full insert sequence. [AK077437]	AK077437	2.94163	0.00051
Chpf	Mus musculus chondroitin polymerizing factor (Chpf), transcript variant 1, mRNA [NM_001001566]	NM_001001566	2.94136	4.31e-10
Mapre1	Mus musculus microtubule-associated protein, RP/EB family, member 1 (Mapre1), mRNA [NM_007896]	AK087318	2.94102	4.43e-10
Fam60a	Mus musculus family with sequence similarity 60, member A (Fam60a), mRNA [NM_019643]	NM_019643	2.94018	4.57e-10
Mrpl3	Mus musculus 2 days pregnant adult female oviduct cDNA, RIKEN full-length enriched library, clone:E230026B07 product:mitochondrial ribosomal protein L3, full insert sequence. [AK054185]	AK054185	2.93998	1e-05
Nudc	Mus musculus nuclear distribution gene C homolog (Aspergillus) (Nudc), mRNA [NM_010948]	NM_010948	2.93904	4.21e-10
AK036024	Mus musculus 16 days neonate cerebellum cDNA, RIKEN full-length enriched library, clone:9630027O14 product:unclassifiable, full insert sequence. [AK036024]	AK036024	2.93807	0.00032
Dmd	Mus musculus adult male hippocampus cDNA, RIKEN full-length enriched library, clone:2900010C03 product:dystrophin, muscular dystrophy, full insert sequence. [AK013510]	AK013510	2.93776	1.36e-08
Abca2	Mus musculus ATP-binding cassette, sub-family A (ABC1), member 2 (Abca2), mRNA [NM_007379]	NM_007379	2.93611	5.14e-10
F630048H11Rik	Mus musculus NOD-derived CD11c +ve dendritic cells cDNA, RIKEN full-length enriched library, clone:F630048H11 product:hypothetical protein, full insert sequence. [AK170335]	AK170335	2.93553	0.00063
TC1667568	Q8WTY3_HUMAN (Q8WTY3) RPL27 protein, partial (38%) [TC1667568]		2.93528	2.05e-07
Mat2b	Mus musculus 16 days neonate thymus cDNA, RIKEN full-length enriched library, clone:A130094D24 product:similar to 5' of METHIONINE ADENOSYLTRANSFERASE REGULATORY BETA SUBUNIT (HYPOTHETICAL 37.6 KDA PROTEIN) [Homo sapiens], full insert sequence. [AK038303]	AK038303	2.93507	4.89e-07
Prkaa2	Mus musculus protein kinase, AMP-activated, alpha 2 catalytic subunit (Prkaa2), mRNA [NM_178143]	NM_178143	2.9348	1.83e-08
Gata6	Mus musculus GATA binding protein 6 (Gata6), mRNA [NM_010258]	NM_010258	2.9342	4.7e-10
Slc25a45	Mus musculus solute carrier family 25, member 45 (Slc25a45), mRNA [NM_134154]	NM_134154	2.93188	4.64e-10
Kif5b	Mus musculus kinesin family member 5B (Kif5b), mRNA [NM_008448]	NM_008448	2.93146	4.49e-10
Slc25a14	Mus musculus 12 days embryo spinal ganglion cDNA, RIKEN full-length enriched library, clone:D130006J18 product:solute carrier family 25 (mitochondrial carrier, brain), member 14, full insert sequence. [AK051145]	AK051145	2.93028	3e-05
Hdgfrp3	Mus musculus hepatoma-derived growth factor, related protein 3 (Hdgfrp3), mRNA [NM_013886]	NM_013886	2.92912	2.3e-07
Pdia4	Mus musculus protein disulfide isomerase associated 4 (Pdia4), mRNA [NM_009787]	NM_009787	2.92901	4.74e-10
Gpc2	Mus musculus glypican 2 (cerebroglycan) (Gpc2), mRNA [NM_172412]	NM_172412	2.92883	8.87e-07
5033430I15Rik	Mus musculus 11 days pregnant adult female ovary and uterus cDNA, RIKEN full-length enriched library, clone:5033430I15 product:hypothetical protein, full insert sequence. [AK017206]	AK017206	2.9288	8.02e-10
Tmem64	Mus musculus transmembrane protein 64 (Tmem64), mRNA [NM_181401]	NM_181401	2.92815	5.11e-10
Tram1l1	Mus musculus translocation associated membrane protein 1-like 1 (Tram1l1), mRNA [NM_146140]	NM_146140	2.92756	6.75e-09
AK078580	Mus musculus 11 days embryo gonad cDNA, RIKEN full-length enriched library, clone:7030409H12 product:unclassifiable, full insert sequence. [AK078580]	AK078580	2.92731	9.05e-06
Krt28	Mus musculus 10 days neonate skin cDNA, RIKEN full-length enriched library, clone:4733401L19 product:similar to TYPE I KERATIN INTERMEDIATE FILAMENT IRSA1 [Ovis aries], full insert sequence. [AK014642]	AK014642	2.92681	0.00011
TC1653151	Unknown		2.92674	6.17e-10
100042016	Mus musculus 16 days embryo head cDNA, RIKEN full-length enriched library, clone:C130039D07 product:unclassifiable, full insert sequence [AK140834]	AK140834	2.92673	1.01e-09
Ndfip1	Mus musculus Nedd4 WW domain-binding protein 5 mRNA, partial cds [AF220209]	BC020359	2.92653	4.68e-10
Anapc1	Mus musculus nullipotent stem cell CRL-2070 NE cDNA, RIKEN full-length enriched library, clone:G431003J08 product:meiotic check point regulator, full insert sequence [AK090134]	AK090134	2.92584	5.16e-10
Cish	Mus musculus cytokine inducible SH2-containing protein (Cish), mRNA [NM_009895]	NM_009895	2.92581	4.86e-10
Smad3	Mus musculus MAD homolog 3 (Drosophila) (Smad3), mRNA [NM_016769]	NM_016769	2.92539	4e-05
Scg5	Mus musculus secretogranin V (Scg5), mRNA [NM_009162]	NM_009162	2.92443	0.00118
Fancg	Mus musculus Fanconi anemia, complementation group G (Fancg), mRNA [NM_053081]	NM_053081	2.9224	1.62e-09
Fam123b	Mus musculus family with sequence similarity 123, member B (Fam123b), mRNA [NM_175179]	NM_175179	2.92237	5.01e-10
Gtf2h3	Mus musculus general transcription factor IIH, polypeptide 3 (Gtf2h3), mRNA [NM_181410]	NM_181410	2.92188	5.31e-10
A_51_P151675	Unknown		2.92088	4.72e-06
Usp9x	Mus musculus ubiquitin specific peptidase 9, X chromosome (Usp9x), mRNA [NM_009481]	NM_009481	2.92056	2e-09
EG639396	Mus musculus predicted gene, EG639396 (EG639396), mRNA [NM_001039251]	NM_001039251	2.91951	7.92e-10
Fetub	Mus musculus fetuin beta (Fetub), transcript variant 1, mRNA [NM_021564]	NM_021564	2.91873	5.83e-09
Zbtb39	Mus musculus zinc finger and BTB domain containing 39 (Zbtb39), mRNA [NM_198035]	NM_198035	2.91862	8.83e-10
Brca1	Mus musculus breast cancer 1 (Brca1), mRNA [NM_009764]	NM_009764	2.9183	0.00183
AK033818	Mus musculus adult male epididymis cDNA, RIKEN full-length enriched library, clone:9230114P20 product:unclassifiable, full insert sequence. [AK033818]	AK033818	2.9141	7.19e-10
Sema6c	Mus musculus sema domain, transmembrane domain (TM), and cytoplasmic domain, (semaphorin) 6C (Sema6c), mRNA [NM_011351]	NM_011351	2.91393	2.55e-09
Arid4b	Mus musculus AT rich interactive domain 4B (RBP1-like) (Arid4b), transcript variant 1, mRNA [NM_194262]	NM_194262	2.91355	5.47e-10
6330577E15Rik	Mus musculus RIKEN cDNA 6330577E15 gene (6330577E15Rik), mRNA [NM_026377]	NM_026377	2.91347	5.24e-10
Slc27a2	Mus musculus solute carrier family 27 (fatty acid transporter), member 2 (Slc27a2), mRNA [NM_011978]	NM_011978	2.91345	2.16e-08
Hoxb13	Mus musculus homeo box B13 (Hoxb13), mRNA [NM_008267]	NM_008267	2.91325	0.00376
Zfp385b	Mus musculus zinc finger protein 385B (Zfp385b), transcript variant 1, mRNA [NM_178723]	NM_178723	2.91104	1.28e-09
Nbea	Mus musculus neurobeachin (Nbea), mRNA [NM_030595]	Y18276	2.90995	2.18e-08
Plekhh1	Mus musculus mRNA for mKIAA1200 protein. [AK122464]	AK052692	2.90913	2.04e-09
Nono	Mus musculus 10, 11 days embryo whole body cDNA, RIKEN full-length enriched library, clone:2810486E17 product:non-POU-domain-containing, octamer binding protein, full insert sequence. [AK013444]	AK013444	2.90888	1.61e-07
Agfg2	Mus musculus ArfGAP with FG repeats 2 (Agfg2), transcript variant 2, mRNA [NM_178162]	NM_178162	2.90831	5.5e-10
Usp24	Mus musculus 9.5 days embryo parthenogenote cDNA, RIKEN full-length enriched library, clone:B130021E18 product:hypothetical Ubiquitin-associated domain containing protein, full insert sequence. [AK045043]	AK045043	2.90765	5.93e-06
Neil2	Mus musculus nei like 2 (E. coli) (Neil2), mRNA [NM_201610]	NM_201610	2.90449	0.00093
C030015A19Rik	Mus musculus 10 days neonate skin cDNA, RIKEN full-length enriched library, clone:4732459B18 product:unclassifiable, full insert sequence. [AK028820]	AK028820	2.90369	5.42e-06
Sgsm1	Mus musculus small G protein signaling modulator 1 (Sgsm1), mRNA [NM_172718]	NM_172718	2.9036	7.68e-10
Lpar1	Mus musculus lysophosphatidic acid receptor 1 (Lpar1), transcript variant 1, mRNA [NM_010336]	NM_010336	2.90287	1.48e-09
Fbxl4	Mus musculus F-box and leucine-rich repeat protein 4 (Fbxl4), mRNA [NM_172988]	NM_172988	2.90184	8.04e-10
AK133344	Mus musculus adult male testis cDNA, RIKEN full-length enriched library, clone:4932437I03 product:unclassifiable, full insert sequence. [AK133344]		2.90173	1.57e-08
Rnf12	Mus musculus ring finger protein 12 (Rnf12), mRNA [NM_011276]	NM_011276	2.90117	5.84e-10
Lipg	Mus musculus lipase, endothelial (Lipg), mRNA [NM_010720]	NM_010720	2.90078	8e-05
Ube3c	Mus musculus ubiquitin protein ligase E3C (Ube3c), mRNA [NM_133907]	NM_133907	2.90012	7.05e-10
Cry2	Mus musculus cryptochrome 2 (photolyase-like) (Cry2), transcript variant 1, mRNA [NM_009963]	NM_009963	2.9	6.57e-10
1600021P15Rik	Mus musculus RIKEN cDNA 1600021P15 gene (1600021P15Rik), mRNA [NM_177718]	NM_177718	2.89879	7.29e-10
Tmem19	Mus musculus transmembrane protein 19 (Tmem19), mRNA [NM_133683]	NM_133683	2.89865	6.27e-10
Lhx8	Mus musculus LIM homeobox protein 8 (Lhx8), mRNA [NM_010713]	NM_010713	2.89839	0.00436
Fpgt	Mus musculus fucose-1-phosphate guanylyltransferase (Fpgt), mRNA [NM_029330]	XM_001005515	2.8975	2.24e-09
Slc13a4	Mus musculus solute carrier family 13 (sodium/sulfate symporters), member 4 (Slc13a4), mRNA [NM_172892]	NM_172892	2.89678	6.65e-10
Pak1ip1	Mus musculus adult male thymus cDNA, RIKEN full-length enriched library, clone:5830431I15 product:PAK1 interacting protein 1, full insert sequence. [AK017959]	AK017959	2.89599	1.31e-09
Cabc1	Mus musculus chaperone, ABC1 activity of bc1 complex like (S. pombe) (Cabc1), nuclear gene encoding mitochondrial protein, mRNA [NM_023341]	NM_023341	2.89427	6.6e-10
AK033846	Mus musculus adult male epididymis cDNA, RIKEN full-length enriched library, clone:9230119B03 product:unclassifiable, full insert sequence [AK033846]	AK033846	2.89422	0.00013
Fam178a	Mus musculus family with sequence similarity 178, member A (Fam178a), mRNA [NM_001081225]	AK031688	2.89259	3e-05
Soat1	Mus musculus sterol O-acyltransferase 1 (Soat1), mRNA [NM_009230]	NM_009230	2.89035	7.12e-10
Esco2	Mus musculus establishment of cohesion 1 homolog 2 (S. cerevisiae) (Esco2), mRNA [NM_028039]	NM_028039	2.88969	1.02e-09
Slc22a17	Mus musculus solute carrier family 22 (organic cation transporter), member 17 (Slc22a17), mRNA [NM_021551]	NM_021551	2.88928	1.02e-09
Xpo7	Mus musculus exportin 7 (Xpo7), mRNA [NM_023045]	NM_023045	2.88918	6.58e-10
Chd6	Mus musculus chromodomain helicase DNA binding protein 6 (Chd6), mRNA [NM_173368]	NM_173368	2.88812	9.02e-10
Igf1r	Mus musculus 9.5 days embryo parthenogenote cDNA, RIKEN full-length enriched library, clone:B130017I18 product:insulin-like growth factor I receptor, full insert sequence. [AK044980]	AK044980	2.88809	1.01e-09
Dnase2a	Mus musculus ES cells cDNA, RIKEN full-length enriched library, clone:2410038B05 product:unclassifiable, full insert sequence. [AK010630]	AK010630	2.88793	1.25e-08
AK042960	Mus musculus 7 days neonate cerebellum cDNA, RIKEN full-length enriched library, clone:A730043L23 product:unclassifiable, full insert sequence [AK042960]	AK042960	2.88782	0.00531
3100002H09Rik	Mus musculus 13 days embryo head cDNA, RIKEN full-length enriched library, clone:3100002H09 product:hypothetical protein, full insert sequence. [AK013916]	AK013916	2.88725	5.2e-07
Epdr1	Mus musculus ependymin related protein 1 (zebrafish) (Epdr1), mRNA [NM_134065]	NM_134065	2.8861	7.85e-10
Amigo2	Mus musculus adhesion molecule with Ig like domain 2 (Amigo2), mRNA [NM_178114]	NM_178114	2.88591	5.7e-09
Phgdh	Mus musculus 3-phosphoglycerate dehydrogenase (Phgdh), mRNA [NM_016966]	NM_016966	2.8856	6.71e-10
Eif1a	Mus musculus eukaryotic translation initiation factor 1A (Eif1a), mRNA [NM_010120]	NM_010120	2.88502	8.5e-10
Tbl1x	Mus musculus transducin (beta)-like 1 X-linked (Tbl1x), mRNA [NM_020601]	NM_020601	2.88403	8.1e-10
Smyd5	Mus musculus SET and MYND domain containing 5 (Smyd5), mRNA [NM_144918]	NM_144918	2.88374	2.86e-09
AK089684	Mus musculus activated spleen cDNA, RIKEN full-length enriched library, clone:F830008J20 product:unclassifiable, full insert sequence. [AK089684]	AK089684	2.88347	0.00013
1500003O22Rik	Mus musculus RIKEN cDNA 1500003O22 gene (1500003O22Rik), mRNA [NM_025897]	NM_025897	2.88342	8.83e-10
Phip	Mus musculus 3 days neonate thymus cDNA, RIKEN full-length enriched library, clone:A630042G05 product:pleckstrin homology domain interacting protein, full insert sequence. [AK041857]	AK041857	2.88341	9.99e-10
Fat1	Mus musculus FAT tumor suppressor homolog 1 (Drosophila) (Fat1), mRNA [NM_001081286]	XM_885736	2.88268	4.13e-09
Nmt2	Mus musculus 7 days embryo whole body cDNA, RIKEN full-length enriched library, clone:C430016F20 product:unclassifiable, full insert sequence [AK049483]	AK049483	2.88263	4.84e-09
Asphd2	Mus musculus aspartate beta-hydroxylase domain containing 2 (Asphd2), mRNA [NM_028386]	NM_028386	2.88211	6.95e-10
Elavl2	Mus musculus ELAV (embryonic lethal, abnormal vision, Drosophila)-like 2 (Hu antigen B) (Elavl2), transcript variant 1, mRNA [NM_207685]	NM_207685	2.88184	7e-10
Cwc15	Mus musculus adult male hippocampus cDNA, RIKEN full-length enriched library, clone:2900052N06 product:unclassifiable, full insert sequence. [AK013670]	AK013670	2.88103	1.27e-09
Uhmk1	Mus musculus 10 days neonate skin cDNA, RIKEN full-length enriched library, clone:4732477C12 product:unclassifiable, full insert sequence [AK028977]	AK028977	2.88039	9.97e-07
Txndc14	Mus musculus thioredoxin domain containing 14 (Txndc14), mRNA [NM_025868]	NM_025868	2.88012	6.98e-10
BM239853	K0541E02-3 NIA Mouse Hematopoietic Stem Cell (Lin- [BM239853]		2.87987	1e-05
TC1779078	Unknown		2.87987	1.02e-09
4732419C18Rik	Mus musculus 10 days neonate skin cDNA, RIKEN full-length enriched library, clone:4732419C18 product:unclassifiable, full insert sequence [AK076318]	AK076318	2.87897	0.0003
Ptchd1	Mus musculus patched domain containing 1 (Ptchd1), mRNA [NM_001093750]	XM_142262	2.87875	2.59e-08
Atic	Mus musculus 5-aminoimidazole-4-carboxamide ribonucleotide formyltransferase/IMP cyclohydrolase (Atic), mRNA [NM_026195]	NM_026195	2.87626	7.43e-10
Fusip1	Mus musculus 10 days neonate skin cDNA, RIKEN full-length enriched library, clone:4732425P20 product:FUS interacting protein (serine-arginine rich) 1, full insert sequence. [AK161097]	AK161097	2.87565	7.28e-10
Bhlhb9	Mus musculus basic helix-loop-helix domain containing, class B9 (Bhlhb9), transcript variant 1, mRNA [NM_198161]	NM_198161	2.87532	7.64e-10
Slc1a4	Mus musculus solute carrier family 1 (glutamate/neutral amino acid transporter), member 4 (Slc1a4), mRNA [NM_018861]	NM_018861	2.87522	3.06e-06
Cspg5	Mus musculus chondroitin sulfate proteoglycan 5 (Cspg5), mRNA [NM_013884]	NM_013884	2.87486	0.0001
TC1639158	HUAC002400 Acyl carrier protein, Mitochondrial (ACP) (5'partial) {Homo sapiens} (exp=0; wgp=1; cg=0), partial (19%) [TC1639158]		2.87474	2.73e-06
Las1l	Mus musculus LAS1-like (S. cerevisiae) (Las1l), mRNA [NM_152822]	NM_152822	2.87261	7.61e-10
Ldhd	Mus musculus lactate dehydrogenase D (Ldhd), nuclear gene encoding mitochondrial protein, mRNA [NM_027570]	NM_027570	2.87259	4.11e-09
ENSMUSG00000052976	BB609792 RIKEN full-length enriched, 18 days embryo Mus musculus cDNA clone 1190008K20 5', mRNA sequence [BB609792]	BB609792	2.87257	5e-05
NAP113293-1	Unknown		2.87186	7.93e-10
Cds2	Mus musculus 8 days embryo whole body cDNA, RIKEN full-length enriched library, clone:5730450N06 product:unclassifiable, full insert sequence. [AK017654]	AK017654	2.87148	8.06e-10
Glod5	Mus musculus glyoxalase domain containing 5 (Glod5), mRNA [NM_027227]	NM_027227	2.87142	0.00093
Amot	Mus musculus angiomotin (Amot), mRNA [NM_153319]	AK129277	2.87088	7.77e-10
Slc25a13	Mus musculus solute carrier family 25 (mitochondrial carrier, adenine nucleotide translocator), member 13 (Slc25a13), nuclear gene encoding mitochondrial protein, mRNA [NM_015829]	NM_015829	2.87084	1.27e-09
Nutf2	Mus musculus nuclear transport factor 2 (Nutf2), mRNA [NM_026532]	NM_026532	2.86981	1.38e-09
Tuba1a	Mus musculus tubulin, alpha 1A (Tuba1a), mRNA [NM_011653]	NM_011653	2.86867	7.7e-10
Prickle1	Mus musculus prickle like 1 (Drosophila) (Prickle1), mRNA [NM_001033217]	NM_001033217	2.8677	7.9e-10
Mgat4b	Mus musculus mannoside acetylglucosaminyltransferase 4, isoenzyme B (Mgat4b), mRNA [NM_145926]	NM_145926	2.86737	8.26e-10
Laptm4b	Mus musculus lysosomal-associated protein transmembrane 4B (Laptm4b), mRNA [NM_033521]	NM_033521	2.86653	7.87e-10
Aes	Mus musculus amino-terminal enhancer of split (Aes), mRNA [NM_010347]	NM_010347	2.86552	7.95e-10
Pkm2	Mus musculus mRNA for pyruvate kinase M, complete cds. [D38379]	D38379	2.86534	7.93e-10
Slc16a1	Mus musculus solute carrier family 16 (monocarboxylic acid transporters), member 1 (Slc16a1), mRNA [NM_009196]	NM_009196	2.86509	8.04e-10
LOC640869	PREDICTED: Mus musculus similar to Leo1, Paf1/RNA polymerase II complex component, homolog (S. cerevisiae) (LOC640869), mRNA [XM_918061]	XM_918061	2.86303	1.94e-06
A_52_P517668	Unknown		2.86288	8.13e-10
AK039098	Mus musculus adult male hypothalamus cDNA, RIKEN full-length enriched library, clone:A230095O17 product:unclassifiable, full insert sequence [AK039098]	AK039098	2.86237	1.46e-09
Smad3	Mus musculus MAD homolog 3 (Drosophila) (Smad3), mRNA [NM_016769]	NM_016769	2.86201	1.18e-09
AK078294	Mus musculus adult male olfactory brain cDNA, RIKEN full-length enriched library, clone:6430577J20 product:unclassifiable, full insert sequence. [AK078294]	AK078294	2.86188	8.62e-06
Zfp623	Mus musculus zinc finger protein 623 (Zfp623), mRNA [NM_030199]	NM_030199	2.86167	8.53e-08
Myst4	Mus musculus MYST histone acetyltransferase monocytic leukemia 4 (Myst4), mRNA [NM_017479]	AF222800	2.86144	9.82e-10
Slc25a36	Mus musculus 16 days neonate thymus cDNA, RIKEN full-length enriched library, clone:A130013B19 product:hypothetical protein, full insert sequence. [AK037383]	AK087750	2.86105	1.92e-08
Wt1	Mus musculus Wilms tumor 1 homolog (Wt1), mRNA [NM_144783]	NM_144783	2.86105	1.52e-20
Rnf217	PREDICTED: Mus musculus IBR domain containing 1 (Ibrdc1), mRNA [XM_193558]	XM_193558	2.86069	5.25e-09
Snx7	Mus musculus sorting nexin 7 (Snx7), mRNA [NM_029655]	BC087942	2.8601	9.54e-10
Tmco4	Mus musculus transmembrane and coiled-coil domains 4 (Tmco4), mRNA [NM_029857]	NM_029857	2.85999	2.97e-09
Ccnt1	Mus musculus cyclin T1 (Ccnt1), mRNA [NM_009833]	NM_009833	2.85885	9.69e-10
Fam178a	Mus musculus 13 days embryo male testis cDNA, RIKEN full-length enriched library, clone:6030443O07 product:unclassifiable, full insert sequence. [AK020064]	AK020064	2.85675	2.76e-08
Nol5a	Mus musculus 2 days neonate thymus thymic cells cDNA, RIKEN full-length enriched library, clone:E430025A07 product:nucleolar protein 5A, full insert sequence. [AK154024]	AK154024	2.85611	1.99e-09
Kdelc1	Mus musculus KDEL (Lys-Asp-Glu-Leu) containing 1 (Kdelc1), mRNA [NM_023645]	NM_023645	2.85604	1.03e-09
Heatr5b	Mus musculus HEAT repeat containing 5B, mRNA (cDNA clone IMAGE:4237004), complete cds. [BC019508]	BC019508	2.85533	0.00868
Slc35d1	Mus musculus 16 days neonate thymus cDNA, RIKEN full-length enriched library, clone:A130065C03 product:hypothetical protein, full insert sequence [AK037934]	AK037934	2.85468	0.00018
Mtmr1	Mus musculus myotubularin related protein 1 (Mtmr1), mRNA [NM_016985]	NM_016985	2.85451	8.83e-10
AK037313	Mus musculus 16 days neonate thymus cDNA, RIKEN full-length enriched library, clone:A130006C07 product:unclassifiable, full insert sequence. [AK037313]	AK037313	2.8539	6.01e-09
Padi2	Mus musculus peptidyl arginine deiminase, type II (Padi2), mRNA [NM_008812]	NM_008812	2.85367	1.08e-09
Ptgds	Mus musculus prostaglandin D2 synthase (brain) (Ptgds), mRNA [NM_008963]	NM_008963	2.85282	1.26e-09
Jagn1	Mus musculus 10 days neonate cortex cDNA, RIKEN full-length enriched library, clone:A830021G02 product:hypothetical protein, full insert sequence. [AK043698]	AK043698	2.85134	3.17e-06
Fam53a	Mus musculus family with sequence similarity 53, member A (Fam53a), mRNA [NM_178390]	NM_178390	2.85077	9.01e-10
Polr3g	Mus musculus polymerase (RNA) III (DNA directed) polypeptide G (Polr3g), mRNA [NM_001081176]	BC066818	2.84896	1.32e-08
Mmp13	Mus musculus matrix metallopeptidase 13 (Mmp13), mRNA [NM_008607]	NM_008607	2.84821	0.00011
Ikbkg	Mus musculus inhibitor of kappaB kinase gamma (Ikbkg), transcript variant 2, mRNA [NM_178590]	NM_178590	2.8481	9.45e-09
Tnpo3	Mus musculus 9.5 days embryo parthenogenote cDNA, RIKEN full-length enriched library, clone:B130040B20 product:unclassifiable, full insert sequence. [AK045143]	AK045143	2.84786	0.00087
3110052M02Rik	Mus musculus 16 days neonate cerebellum cDNA, RIKEN full-length enriched library, clone:9630012B19 product:unclassifiable, full insert sequence [AK162561]	AK162561	2.84494	0.00066
Itga3	Mus musculus integrin alpha 3 (Itga3), mRNA [NM_013565]	NM_013565	2.84363	2.92e-09
Crlf1	Mus musculus cytokine receptor-like factor 1 (Crlf1), mRNA [NM_018827]	NM_018827	2.84345	0.0007
Ifrg15	Mus musculus interferon alpha responsive gene (Ifrg15), mRNA [NM_022329]	NM_022329	2.84237	9.91e-10
Sh3d19	Mus musculus SH3d19 mRNA for SH3 domain protein D19, complete cds. [D89677]	D89677	2.84124	1.12e-09
Cyth3	Mus musculus cytohesin 3 (Cyth3), mRNA [NM_011182]	NM_011182	2.84047	1.07e-09
Rhot1	Mus musculus ras homolog gene family, member T1 (Rhot1), mRNA [NM_021536]	NM_021536	2.84026	8.64e-06
Mesdc1	Mus musculus mesoderm development candidate 1 (Mesdc1), mRNA [NM_030705]	NM_030705	2.84	1.19e-09
Atp8b2	Mus musculus ATPase, class I, type 8B, member 2 (Atp8b2), mRNA [NM_001081182]	XM_283873	2.83956	1e-09
AK036293	Mus musculus 16 days neonate cerebellum cDNA, RIKEN full-length enriched library, clone:9630054E03 product:unclassifiable, full insert sequence. [AK036293]	AK036293	2.83917	2e-05
Rest	Mus musculus 10 days embryo whole body cDNA, RIKEN full-length enriched library, clone:2610008J04 product:unclassifiable, full insert sequence [AK011349]	AK011349	2.839	1.02e-09
Cpt1a	Mus musculus carnitine palmitoyltransferase 1a, liver (Cpt1a), nuclear gene encoding mitochondrial protein, mRNA [NM_013495]	NM_013495	2.83848	1.19e-09
AK085374	Mus musculus 0 day neonate kidney cDNA, RIKEN full-length enriched library, clone:D630018B17 product:unclassifiable, full insert sequence. [AK085374]	AK085374	2.83719	2.05e-09
Gne	Mus musculus adult male colon cDNA, RIKEN full-length enriched library, clone:9030414E18 product:UDP-N-acetylglucosamine-2-epimerase [AK033507]	AK033507	2.83496	6.3e-08
ENSMUSG00000071543	Mus musculus adult male adrenal gland cDNA, RIKEN full-length enriched library, clone:B330003H21 product:hypothetical protein, full insert sequence. [AK046516]	AK046516	2.83492	1.15e-09
Slc45a4	Mus musculus solute carrier family 45, member 4, mRNA (cDNA clone MGC:67529 IMAGE:5720940), complete cds. [BC056501]	BC056501	2.832	1.06e-09
Col24a1	Mus musculus collagen, type XXIV, alpha 1 (Col24a1), mRNA [NM_027770]	NM_027770	2.83152	0.00028
Cwf19l2	Mus musculus 14, 17 days embryo head cDNA, RIKEN full-length enriched library, clone:3230401L03 product:CWF19-like 2, cell cycle control (S. pombe), full insert sequence. [AK014327]	AK014327	2.83146	5.26e-09
Lmo4	Mus musculus LIM domain only 4 (Lmo4), mRNA [NM_010723]	NM_010723	2.83126	1.31e-09
Nfx1	Mus musculus nuclear transcription factor, X-box binding 1 (Nfx1), mRNA [NM_023739]	NM_023739	2.83043	1.19e-09
Ppp2r1a	Mus musculus protein phosphatase 2 (formerly 2A), regulatory subunit A (PR 65), alpha isoform (Ppp2r1a), mRNA [NM_016891]	NM_016891	2.82981	1.1e-09
Cpne8	Mus musculus copine VIII (Cpne8), transcript variant 2, mRNA [NM_001033851]	NM_025815	2.82914	4.35e-09
E130308A19Rik	Mus musculus RIKEN cDNA E130308A19 gene (E130308A19Rik), transcript variant 2, mRNA [NM_001015681]	NM_001015681	2.82717	1.15e-09
Pdia6	Mus musculus 2 days neonate sympathetic ganglion cDNA, RIKEN full-length enriched library, clone:7120464C04 product:thioredoxin domain containing 7, full insert sequence [AK148928]	AK148928	2.82706	1.31e-09
ENSMUST00000084200	PR domain containing 2, with ZNF domain Gene [Source:MGI (curated);Acc:Prdm2-001] [ENSMUST00000084200]	XM_898822	2.82689	7.2e-07
Heatr3	Mus musculus HEAT repeat containing 3 (Heatr3), mRNA [NM_172757]	NM_172757	2.82387	1.16e-07
9030624J02Rik	Mus musculus RIKEN cDNA 9030624J02 gene, mRNA (cDNA clone IMAGE:3485091), partial cds. [BC007154]	BC007154	2.82332	1e-05
AK038190	Mus musculus 16 days neonate thymus cDNA, RIKEN full-length enriched library, clone:A130085J21 product:unclassifiable, full insert sequence. [AK038190]	AK038190	2.82327	1.48e-09
Fzd3	Mus musculus frizzled homolog 3 (Drosophila) (Fzd3), mRNA [NM_021458]	NM_021458	2.82322	2.28e-09
Fbxl14	Mus musculus F-box and leucine-rich repeat protein 14 (Fbxl14), mRNA [NM_133940]	NM_133940	2.82284	1.17e-09
Spg20	Mus musculus mRNA for mKIAA0610 protein. [AK129171]	AK129171	2.82264	1.24e-09
C030006K11Rik	Mus musculus RIKEN cDNA C030006K11 gene (C030006K11Rik), mRNA [NM_176828]	NM_176828	2.82073	1.31e-09
2610002J23Rik	Mus musculus 15 days embryo head cDNA, RIKEN full-length enriched library, clone:D930027A02 product:unclassifiable, full insert sequence [AK164857]	AK164857	2.82044	1.85e-08
Numa1	Mus musculus nuclear mitotic apparatus protein 1 (Numa1), mRNA [NM_133947]	NM_133947	2.81795	1.2e-09
Gramd3	Mus musculus GRAM domain containing 3 (Gramd3), mRNA [NM_026240]	AK004147	2.8176	1.34e-09
Vamp2	Mus musculus vesicle-associated membrane protein 2 (Vamp2), mRNA [NM_009497]	NM_009497	2.816	1.33e-09
Pygo1	Mus musculus pygopus 1 (Pygo1), mRNA [NM_028116]	NM_028116	2.81494	2e-05
Axin2	Mus musculus axin2 (Axin2), mRNA [NM_015732]	NM_015732	2.81414	7.03e-09
NP384006	GB	D50656	2.81233	6.37e-06
Syne2	Mus musculus synaptic nuclear envelope 2 (Syne2), mRNA [NM_001005510]	BC082586	2.81182	1.27e-09
D19Bwg1357e	Mus musculus DNA segment, Chr 19, Brigham & Women's Genetics 1357 expressed (D19Bwg1357e), mRNA [NM_177474]	AK141893	2.81164	5.75e-09
Uimc1	Mus musculus 13 days embryo heart cDNA, RIKEN full-length enriched library, clone:D330018D10 product:unclassifiable, full insert sequence. [AK084590]	AK084590	2.80896	6.73e-07
Tns3	Mus musculus tensin 3 (Tns3), mRNA [NM_001083587]	XM_109868	2.80877	1.34e-09
Mitd1	Mus musculus MIT, microtubule interacting and transport, domain containing 1, mRNA (cDNA clone MGC:28063 IMAGE:3709157), complete cds. [BC020137]	BC020137	2.80862	7e-05
BC004015	Mus musculus cDNA clone MGC:7593 IMAGE:3493893, complete cds [BC004015]	BC004015	2.80862	1.31e-09
2810403A07Rik	Mus musculus 12 days embryo spinal cord cDNA, RIKEN full-length enriched library, clone:C530033N14 product:RIKEN cDNA 2810403A07 gene (KH-domain structure containing protein), full insert sequence. [AK083018]	AK083018	2.8085	1.31e-06
Lnp	Mus musculus limb and neural patterns (Lnp), transcript variant 1, mRNA [NM_027133]	NM_027133	2.80802	2.63e-09
Ppm1k	Mus musculus protein phosphatase 1K (PP2C domain containing) (Ppm1k), mRNA [NM_175523]	NM_175523	2.80735	1.42e-09
Nedd9	Mus musculus neural precursor cell expressed, developmentally down-regulated gene 9 (Nedd9), transcript variant 2, mRNA [NM_017464]	NM_017464	2.80692	5.83e-09
Bcl9l	Mus musculus B-cell CLL/lymphoma 9-like (Bcl9l), mRNA [NM_030256]	NM_030256	2.80674	1.86e-09
Cdh20	Mus musculus cadherin 20 (Cdh20), mRNA [NM_011800]	NM_011800	2.80618	7.69e-09
Fam120b	Mus musculus family with sequence similarity 120, member B (Fam120b), mRNA [NM_024203]	NM_024203	2.80598	3.19e-08
Zfp295	Mus musculus zinc finger protein 295 (Zfp295), transcript variant 1, mRNA [NM_175428]	AK129313	2.80585	1.02e-06
Plac1	Mus musculus placental specific protein 1 (Plac1), mRNA [NM_019538]	NM_019538	2.80572	7.74e-09
Wdr82	Mus musculus WD repeat domain containing 82 (Wdr82), mRNA [NM_029896]	AK037620	2.80547	3.1e-09
AK047954	Mus musculus 16 days embryo head cDNA, RIKEN full-length enriched library, clone:C130023G17 product:unclassifiable, full insert sequence [AK047954]	AK047954	2.80503	3e-05
AK041753	Mus musculus 3 days neonate thymus cDNA, RIKEN full-length enriched library, clone:A630035A22 product:unclassifiable, full insert sequence. [AK041753]	AK041753	2.80463	1.82e-09
AK042005	Mus musculus 3 days neonate thymus cDNA, RIKEN full-length enriched library, clone:A630051M24 product:origin of replication 3 homolog (S. cerevisiae), full insert sequence. [AK042005]	AK042005	2.80453	0.00657
AK033617	Mus musculus adult male cecum cDNA, RIKEN full-length enriched library, clone:9130202G13 product:unclassifiable, full insert sequence [AK033617]	AK033617	2.80416	0.00678
Sec24a	Mus musculus 13 days embryo male testis cDNA, RIKEN full-length enriched library, clone:6030450O12 product:similar to PROTEIN TRANSPORT PROTEIN SEC24A (SEC24-RELATED PROTEIN A) (FRAGMENT) [Homo sapiens], full insert sequence. [AK031553]	AK031553	2.80408	3.91e-08
Snhg11	Mus musculus small nucleolar RNA host gene 11 (non-protein coding) (Snhg11), mRNA [NM_175692]	BC028327	2.80369	3.23e-08
Snhg11	Mus musculus small nucleolar RNA host gene 11 (non-protein coding) (Snhg11), mRNA [NM_175692]	AK147324	2.80274	0.00011
Trim6	Mus musculus tripartite motif-containing 6 (Trim6), mRNA [NM_001013616]	NM_001013616	2.80252	1.61e-09
Fasn	Mus musculus fatty acid synthase (Fasn), mRNA [NM_007988]	NM_007988	2.80222	1.38e-09
E330009E22Rik	Mus musculus 12 days embryo embryonic body between diaphragm region and neck cDNA, RIKEN full-length enriched library, clone:9430032H24 product:unclassifiable, full insert sequence. [AK034763]	AK034763	2.80208	0.0018
Daam2	Mus musculus dishevelled associated activator of morphogenesis 2 (Daam2), mRNA [NM_001008231]	NM_001008231	2.80203	4.57e-09
Ptpn21	Mus musculus protein tyrosine phosphatase, non-receptor type 21 (Ptpn21), mRNA [NM_011877]	NM_011877	2.80132	1.59e-09
Ncor1	Mus musculus 0 day neonate kidney cDNA, RIKEN full-length enriched library, clone:D630043D02 product:unclassifiable, full insert sequence. [AK052753]	AK052753	2.80032	0.00535
D130062J21Rik	Mus musculus 12 days embryo spinal ganglion cDNA, RIKEN full-length enriched library, clone:D130062J21 product:hypothetical protein, full insert sequence. [AK051661]	AK051661	2.79991	6.39e-08
Ddx19a	Mus musculus DEAD (Asp-Glu-Ala-Asp) box polypeptide 19a (Ddx19a), mRNA [NM_007916]	NM_007916	2.79949	1.01e-08
Ntf5	Mus musculus neurotrophin 5 (Ntf5), mRNA [NM_198190]	NM_198190	2.79893	3.26e-08
Lin28b	Mus musculus lin-28 homolog B (C. elegans) (Lin28b), mRNA [NM_001031772]	NM_001031772	2.79878	2.5e-09
Rbmx2	Mus musculus RNA binding motif protein, X-linked 2 (Rbmx2), mRNA [NM_173376]	NM_173376	2.79827	2.73e-08
Rras2	Mus musculus related RAS viral (r-ras) oncogene homolog 2 (Rras2), mRNA [NM_025846]	NM_025846	2.79806	3.93e-09
BF123006	601761677F1 NCI_CGAP_Mam5 Mus musculus cDNA clone IMAGE:4024794 5'. [BF123006]	XM_992169	2.79778	1.6e-09
Sp6	Mus musculus trans-acting transcription factor 6 (Sp6), mRNA [NM_031183]	NM_031183	2.79715	5.02e-09
Nudt21	Mus musculus 8 days embryo whole body cDNA, RIKEN full-length enriched library, clone:5730530J16 product:inferred: RIKEN cDNA 5730530J16 gene, full insert sequence [AK017799]	BC090834	2.7969	3.33e-09
Ncoa7	Mus musculus nuclear receptor coactivator 7 (Ncoa7), transcript variant 1, mRNA [NM_172495]	BC076623	2.79688	1.48e-09
[truncated: 7,978 more rows]
